# Supplementary material for: Changes in the Structures and Directions of Rock Excavation Research from 1999 to 2020: A Bibliometric Study
Source: Hindawi journal article supplement (doi:10.1155/2021/9274918), 2021-01-01
Supplement: f1 [file 9274918.f1.txt]

PT	AU	BA	BE	GP	AF	BF	CA	TI	SO	SE	BS	LA	DT	CT	CY	CL	SP	HO	DE	ID	AB	C1	RP	EM	RI	OI	FU	FX	CR	NR	TC	Z9	U1	U2	PU	PI	PA	SN	EI	BN	J9	JI	PD	PY	VL	IS	PN	SU	SI
J	Shi, XY; Li, ZL; Cai, QX; Zhou, W; Li, WS				Shi, Xuyang; Li, Zhaolin; Cai, Qingxiang; Zhou, Wei; Li, Wenshuai			Influence of Three-Dimensional Stress Field Variation on Fracture Evolution Characteristics of a Roof	GEOFLUIDS			English	Article								Excavation disturbance on the dynamic variation of the three-dimensional stress field is the main cause for the dynamic disasters of the surrounding rock mass of the roof. The stress condition in the surrounding rock mass of the roof during entry excavation and its impact on entry stability are systemically studied in this study. It is found that the surrounding rock mass of the roof is mainly in…	[Shi, Xuyang; Li, Zhaolin; Cai, Qingxiang; Zhou, Wei] China Univ Min & Technol, Sch Mines, Xuzhou 221116, Jiangsu, Peoples R China; [Shi, Xuyang; Li, Zhaolin; Cai, Qingxiang; Zhou, Wei] China Univ Min & Technol, State Key Lab Coal Resources & Safe Min, Xuzhou 221116, Jiangsu, Peoples R China; [Li, Wenshuai] China Univ Min & Technol, State Key Lab Geomech & Deep Underground Engn, Xuzhou 221116, Ji…	Zhou, W (corresponding author), China Univ Min & Technol, Sch Mines, Xuzhou 221116, Jiangsu, Peoples R China.; Zhou, W (corresponding author), China Univ Min & Technol, State Key Lab Coal Resources & Safe Min, Xuzhou 221116, Jiangsu, Peoples R China.	sxywlp2008@163.com; zhlcumt@163.com; qxcai@cumt.edu.cn; loutian1982@126.com; lwsnote@163.com			School Basic Scientific Research Operating Expenses Project [2017XKQY097]	We gratefully acknowledge the support provided by the School Basic Scientific Research Operating Expenses Project (2017XKQY097).	Bonan Wang, 2019, International Journal of Coal Science & Technology, V6, P536, DOI 10.1007/s40789-019-00277-0; Cai M, 2008, INT J ROCK MECH MIN, V45, P763, DOI 10.1016/j.ijrmms.2007.07.026; Cai YD, 2014, INT J COAL GEOL, V122, P91, DOI 10.1016/j.coal.2013.12.012; Diederichs MS, 2004, INT J ROCK MECH MIN, V41, P785, DOI 10.1016/j.ijrmms.2004.02.003; Eberhardt E, 2001, INT J ROCK MECH MIN, V38, P4…	36	0	0	1	1	WILEY-HINDAWI	LONDON	ADAM HOUSE, 3RD FL, 1 FITZROY SQ, LONDON, WIT 5HE, ENGLAND	1468-8115	1468-8123		GEOFLUIDS	Geofluids	DEC 28	2020	2020
J	Hong, Y; Shao, ZS; Shi, GB; Liu, JB				Hong, Yong; Shao, Zhushan; Shi, Guangbin; Liu, Jiabao			Stability and Countermeasures for a Deposit Slope with Artificial Scarp: Numerical Analysis and Field Monitoring	ADVANCES IN CIVIL ENGINEERING			English	Article							PILES; LANDSLIDE	This paper presents the results of the stability analysis of a deposit slope with an artificial scarp in a tunnel exit and an evaluation of the effectiveness of four proposed reinforcement schemes. A typical slope section was used to study the deposit slope stability and retaining mechanisms of the reinforcement systems. A series of two-dimensional (2D) finite element models (FEM), combined with …	[Hong, Yong; Shao, Zhushan; Shi, Guangbin] Xian Univ Architecture & Technol, Xian 710055, Peoples R China; [Liu, Jiabao] 1st Engn Co Ltd China Railway, Bur Grp 12, Xian 710038, Peoples R China	Shao, ZS (corresponding author), Xian Univ Architecture & Technol, Xian 710055, Peoples R China.	hy201105@xauat.edu.cn; shaozhushan@xauat.edu.cn; sgb0316@163.com; 2894164660@qq.com		Shao, Zhushan/0000-0002-7889-4732	National Natural Science Foundation of ChinaNational Natural Science Foundation of China (NSFC) [11872287]; Foundation of Shaanxi Key Research and Development Program [2019ZDLGY01-10]	The authors would like to express their thanks for the financial support provided by the National Natural Science Foundation of China (Grant no. 11872287) and the Foundation of Shaanxi Key Research and Development Program (no. 2019ZDLGY01-10).	Barla G, 2013, LANDSLIDES, V10, P343, DOI 10.1007/s10346-013-0396-2; Bicocchi G, 2019, B ENG GEOL ENVIRON, V78, P4875, DOI 10.1007/s10064-018-01449-z; Chen Hongqi, 2005, J GEOTECHNICAL ENG, V27, P323; Chen ZY, 2016, J ROCK MECH GEOTECH, V8, P775, DOI 10.1016/j.jrmge.2016.11.001; Cheng WC, 2020, TUNN UNDERGR SP TECH, V96, DOI 10.1016/j.tust.2019.103178; Griffiths DV, 1999, GEOTECHNIQUE, V49, P387,…	37	0	0	4	4	HINDAWI LTD	LONDON	ADAM HOUSE, 3RD FLR, 1 FITZROY SQ, LONDON, W1T 5HF, ENGLAND	1687-8086	1687-8094		ADV CIV ENG	Adv. Civ. Eng.	DEC 28	2020	2020
J	Xu, CB; Qin, YL				Xu Chongbang; Qin Youlin			Study on Identification of Construction Method for Ultra-Large-Span Tunnel	ADVANCES IN CIVIL ENGINEERING			English	Article								Although the determination of tunnel construction methods is extremely critical for the construction of ultra-large-span tunnels, the determination of construction methods is still at a qualitative level, which relies on the engineering experience of on-site technicians and lacks rigorous and systematic theoretical basis and technical standards. By means of orthogonal test method, the proper cons…	[Xu Chongbang; Qin Youlin] Highway Minist Transport, Bridge & Tunnel Res Ctr, Res Inst, Beijing 100088, Peoples R China; [Xu Chongbang; Qin Youlin] Natl Engn Lab Bridge Sructure Safety Technol, Beijing 100088, Peoples R China; [Xu Chongbang; Qin Youlin] Minist Transport, Res Inst, Res & Dev Ctr Transport Ind Technol & Equipments, Highway Minist Transport, Beijing 100088, Peoples R China	Xu, CB (corresponding author), Highway Minist Transport, Bridge & Tunnel Res Ctr, Res Inst, Beijing 100088, Peoples R China.; Xu, CB (corresponding author), Natl Engn Lab Bridge Sructure Safety Technol, Beijing 100088, Peoples R China.; Xu, CB (corresponding author), Minist Transport, Res Inst, Res & Dev Ctr Transport Ind Technol & Equipments, Highway Minist Transport, Beijing 100088, Peoples R C…	xubang-2003@163.com			Special Science and Technology Innovation Fund of Research Institute of Highway Ministry of Transport [2019-C505]; Central Public-Interest Scientific Institution Basal Research Fund [2020-9032]	This study was financially supported by the Special Science and Technology Innovation Fund of Research Institute of Highway Ministry of Transport (grant no. 2019-C505) and the Central Public-Interest Scientific Institution Basal Research Fund (grant no. 2020-9032).	CCCC Second Highway Consultants Co. Ltd, 2010, GUID DES HIGHW TUNN; Chong-bang X., 2009, CHINESE J ROCK MECH, V28, P17; Chong-bang X., 2016, HIGHWAY, V61, P261; HAN Xian-min, 2011, ROCK SOIL MECH S1, V32, P725; Hong-Xing H., 2020, J WATER RESOURCES AR, V18, P150; Jian-xun C., 2018, ROAD MACHINERY CONST, V35, P36; Kai-Tai F., 2001, ORTHOGONAL UNIFORM E; [李炎延 Li Yanyan], 2015, [地下空间与工程学报, Chinese J…	24	0	0	0	0	HINDAWI LTD	LONDON	ADAM HOUSE, 3RD FLR, 1 FITZROY SQ, LONDON, W1T 5HF, ENGLAND	1687-8086	1687-8094		ADV CIV ENG	Adv. Civ. Eng.	DEC 24	2020	2020
J	Li, CW; Zhang, XQ; Wei, CM; Nie, Y				Li, Chengwu; Zhang, Xiaoqian; Wei, Chengmin; Nie, Yao			Study on Plastic Zone Distribution Characteristic of Coal and Rock Mass in Excavation from Crosscut Coal	GEOFLUIDS			English	Article								Coal and gas outburst is a serious disaster in the mining, and crosscut coal is the most prone to cause the coal and gas outburst. In order to study the mechanism of outburst, this paper studied the stress distribution characteristics in front of the working face in the process of rock roadway driving before implementing crosscut coal firstly. On this basis, the hypothesis of stress distribution …	[Li, Chengwu; Zhang, Xiaoqian; Wei, Chengmin; Nie, Yao] China Univ Min & Technol Beijing, Sch Emergency Management & Safety Engn, Beijing 100083, Peoples R China	Zhang, XQ (corresponding author), China Univ Min & Technol Beijing, Sch Emergency Management & Safety Engn, Beijing 100083, Peoples R China.	sdslcszxq@163.com		Zhang, Xiaoqian/0000-0003-3876-9440			Black DJ, 2019, INT J MIN SCI TECHNO, V29, P815, DOI 10.1016/j.ijmst.2019.01.007; Britain, 2018, BAS BP WORLD EN PROS, V2017; Chen Y.J, 2015, STUDY METHODS OUTBUR; Ding YL, 2018, FUEL, V234, P1221, DOI 10.1016/j.fuel.2018.07.143; Du CG, 2019, APPL SCI-BASEL, V9, DOI 10.3390/app9235223; [高魁 Gao Kui], 2015, [岩石力学与工程学报, Chinese Journal of Rock Mechanics and Engineering], V34, P305; Griffith WA, 2014…	32	1	1	1	1	WILEY-HINDAWI	LONDON	ADAM HOUSE, 3RD FL, 1 FITZROY SQ, LONDON, WIT 5HE, ENGLAND	1468-8115	1468-8123		GEOFLUIDS	Geofluids	DEC 24	2020	2020
J	Liu, YT; Qiao, J; Han, TY; Li, LH; Xu, T				Liu, Yongtao; Qiao, Jie; Han, Tianyuan; Li, Longhui; Xu, Ting			A 3D Image Reconstruction Model for Long Tunnel Geological Estimation	JOURNAL OF ADVANCED TRANSPORTATION			English	Article								Long tunnels often collapse during the construction period. To ensure personnel safety, the geological characteristics must be predicted before tunnel face excavation. In this study, the ground-penetrating radar (GPR) technique is introduced to obtain information regarding the tunnel excavation face at a certain interval. The amplitude of the radar echo signal is expressed as a function of the po…	[Liu, Yongtao; Qiao, Jie; Han, Tianyuan] Changan Univ, Sch Automobile, Xian 710064, Peoples R China; [Li, Longhui] Automot Data China Co Ltd, Tianjin 300300, Peoples R China; [Xu, Ting] Changan Univ, Coll Transportat Engn, Xian 710064, Peoples R China	Qiao, J (corresponding author), Changan Univ, Sch Automobile, Xian 710064, Peoples R China.; Xu, T (corresponding author), Changan Univ, Coll Transportat Engn, Xian 710064, Peoples R China.	2016022001@chd.edu.cn; 850573553@qq.com			National Science of Foundation of ChinaNational Natural Science Foundation of China (NSFC) [U1664264, 51878066]; Humanities and Social Sciences Youth Fund of Ministry of Education [18YJCZH110]; Fundamental Research Funds for the Central Universities in China [300102220111, 300102120111, 300102229201, 300102229668]	The authors would like to thank Chang'an University for providing equipment. Also, they specially thank the graduate students who helped them in data collection. The project was supported by the National Science of Foundation of China (Grant nos. U1664264 and 51878066), the Humanities and Social Sciences Youth Fund of Ministry of Education (18YJCZH110), and Fundamental Research Funds for the Cent…	Alani AM, 2018, CONSTR BUILD MATER, V158, P1111, DOI 10.1016/j.conbuildmat.2017.09.100; Benedetto A, 2017, SIGNAL PROCESS, V132, P201, DOI 10.1016/j.sigpro.2016.05.016; Cao X, 2014, RAILWAY STANDARD DES, V58, P8; DAVIS JL, 1989, GEOPHYS PROSPECT, V37, P531, DOI 10.1111/j.1365-2478.1989.tb02221.x; Frederick J R, 1965, ULTRASONIC ENG; He Z.N, 2016, TUNNEL CONSTRUC, V36, P636; Ismail MAM, 2019, MEAS…	42	0	0	4	4	WILEY-HINDAWI	LONDON	ADAM HOUSE, 3RD FL, 1 FITZROY SQ, LONDON, WIT 5HE, ENGLAND	0197-6729	2042-3195		J ADV TRANSPORT	J. Adv. Transp.	DEC 23	2020	2020
J	Rao, JY; Tao, YH; Xiong, P; Nie, CX; Peng, H; Xue, YH; Xi, ZW				Rao, Junying; Tao, Yonghu; Xiong, Peng; Nie, Chongxin; Peng, Hao; Xue, Yanghao; Xi, Zuowei			Research on the Large Deformation Prediction Model and Supporting Measures of Soft Rock Tunnel	ADVANCES IN CIVIL ENGINEERING			English	Article								The weak surrounding rock has the characteristics of easy softening, poor integrity, low mechanical strength, etc., which makes it easy to induce different degrees of deformation and damage under excavation disturbance and then seriously affects the stability of the tunnel. Carrying out soft rock tunnel deformation prediction research and designing the supporting structure according to the predic…	[Rao, Junying; Tao, Yonghu; Xiong, Peng; Nie, Chongxin; Peng, Hao; Xue, Yanghao; Xi, Zuowei] Guizhou Univ, Sch Civil Engn, Guiyang 550025, Guizhou, Peoples R China	Tao, YH (corresponding author), Guizhou Univ, Sch Civil Engn, Guiyang 550025, Guizhou, Peoples R China.	1562521808@qq.com		Tao, Yonghu/0000-0002-9575-1047	National Science Foundation of ChinaNational Natural Science Foundation of China (NSFC) [51968010, 51608141]; Science and Technology Planning Project of Guizhou Province [[2012]63, [2017]5788]	This paper was sponsored by the National Science Foundation of China (Grant nos. 51968010 and 51608141) and the Science and Technology Planning Project of Guizhou Province (Grant nos. [2012]63 and [2017]5788).	Bi W., 2011, MODERN TUNNELLING TE, V48, P53; Cammardella NJ, 2018, CLEM UNIV POWER SYST; Chen Y., 2007, GEOTECHNICAL ENG WOR, V12, P30; Das R., 2020, UNDERGROUND SPACE, DOI [10.1016/j.undsp.2020.06.001, DOI 10.1016/J.UNDSP.2020.06.001]; Gong Y., 2020, SCI J EC MANAGEMENT, V2; Guan B., 1993, INTRO TUNNEL MECH; Harding A., 2014, P 15 AUSTR TUNN C 20; Hu D., 2016, INT J EARTH SCI ENG, V9, P1839; Hu …	33	0	0	3	3	HINDAWI LTD	LONDON	ADAM HOUSE, 3RD FLR, 1 FITZROY SQ, LONDON, W1T 5HF, ENGLAND	1687-8086	1687-8094		ADV CIV ENG	Adv. Civ. Eng.	DEC 22	2020	2020
J	Keneti, A; Sainsbury, BA				Keneti, Ali; Sainsbury, Bre-Anne			Development of a semi-quantitative risk matrix for strain-burst hazard assessment - A numerical modelling approach in the absence of micro-seismic data	ENGINEERING GEOLOGY			English	Article						Rock mass violent failure; Strain-burst; Geo-hazard risk assessment; Three-dimensional non-linear numerical modelling	CANADIAN GEOTECHNICAL COLLOQUIUM; II HYDROPOWER STATION; HARD-ROCK; IN-SITU; ROCKBURST; STRESS; ENERGY; BRITTLENESS; PROPAGATION; PREDICTION	Existing rockburst evaluation techniques are empirical in nature which limit their use to situations where seismic monitoring data is available. The proposed technique outlined herein is intended to be most useful to consider the risk of strain-burst events when seismic data is not available, e.g. during pre-feasibility or feasibility stage studies. As development progresses and seismic data is g…	[Keneti, Ali] Monash Univ, Dept Civil Engn, Melbourne, Vic 3800, Australia; [Sainsbury, Bre-Anne] Deakin Univ, Sch Sci Engn & Built Environm, Waurn Ponds, Vic 3216, Australia	Keneti, A (corresponding author), Monash Univ, Dept Civil Engn, Melbourne, Vic 3800, Australia.	Seyedali.Rezaeikeneti@Monash.Edu			Aeris Resources Ltd. (Australia); Tritton Gold Mine (Australia); Agnico Eagle Mines Ltd. (Canada); LaRonde Mine (Canada); AngloGold Ashanti Ltd. (Australia); Ernest Henry Mining (Australia); Glencore Sudbury Integrated Nickel Operations (Canada); Gold Fields Australia Pty Ltd. (Australia); Granny Smith Mine (Australia); St Ives and Agnew Mines (Australia); Luossavaara -Kiirunavaara AB (Sweden); N…	The authors would like to thank the M464 Sponsors that include Aeris Resources Ltd., Tritton Gold Mine (Australia); Agnico Eagle Mines Ltd., LaRonde Mine (Canada); AngloGold Ashanti Ltd. (Australia); Ernest Henry Mining (Australia); Glencore Sudbury Integrated Nickel Operations (Canada); Gold Fields Australia Pty Ltd., Granny Smith Mine, St Ives and Agnew Mines (Australia); Luossavaara -Kiirunava…	Abioye AV, 2017, ENG GEOL, V221, P82, DOI 10.1016/j.enggeo.2017.02.029; Bieniawski Z.T., 1967, MECH BRITTLE FRACTUR, DOI [10.1016/0148-9062(67)90030-7, DOI 10.1016/0148-9062(67)90030-7]; Cai M., 2018, ROCKBURST SUPPORT RE, V1; Cundall P., 2005, ICG05229218; Diederichs MS, 2007, CAN GEOTECH J, V44, P1082, DOI 10.1139/T07-033; Diederichs MS, 2004, INT J ROCK MECH MIN, V41, P785, DOI 10.1016/j.ijrmm…	59	0	0	6	6	ELSEVIER	AMSTERDAM	RADARWEG 29, 1043 NX AMSTERDAM, NETHERLANDS	0013-7952	1872-6917		ENG GEOL	Eng. Geol.	DEC 20	2020	279
J	Cai, J				Cai, Jie			Determination of the Installation Time of Secondary Liner during Excavation of Large Cross-Section Double-Arch Tunnels	ADVANCES IN CIVIL ENGINEERING			English	Article							CONVERGENCE	Double-arch tunnel construction involves in high risk due to its large span and special structural shape. In order to explore the proper installation time for the secondary liner during the excavation of large cross-sectional double-arch tunnels supported by three layers of the liner, this paper optimizes the distribution of the stress release ratio based on the analysis of surrounding rock defor…	[Cai, Jie] Transportat Infrastruct Construct Qual & Safet Su, Fuzhou 350001, Fujian, Peoples R China	Cai, J (corresponding author), Transportat Infrastruct Construct Qual & Safet Su, Fuzhou 350001, Fujian, Peoples R China.	1141577673@qq.com					[Anonymous], 2016, INT J ROCK MECH MINI; [Anonymous], 2015, 500862015 GB; Bizjak KF, 2004, ENG GEOL, V75, P89, DOI 10.1016/j.enggeo.2004.05.003; Carranza-Torres C, 2000, TUNN UNDERGR SP TECH, V15, P187, DOI 10.1016/S0886-7798(00)00046-8; Chang Z. H., 2017, STUDY INITIAL INSTAL; Galli G, 2004, COMPUT GEOTECH, V31, P171, DOI 10.1016/j.compgeo.2004.02.003; [刘志春 LIU Zhichun], 2008, [岩石力学与工程学报, Chines…	17	0	0	1	1	HINDAWI LTD	LONDON	ADAM HOUSE, 3RD FLR, 1 FITZROY SQ, LONDON, W1T 5HF, ENGLAND	1687-8086	1687-8094		ADV CIV ENG	Adv. Civ. Eng.	DEC 18	2020	2020
J	Zhang, C; Wang, C; Niu, XB; Zhang, SQ; Zhao, HL				Zhang, Chao; Wang, Chao; Niu, Xibin; Zhang, Shaoqiang; Zhao, Huiling			Effect of the Double-Line Spiral Tunnel Curvature on the Tunnel Construction Stability	ADVANCES IN CIVIL ENGINEERING			English	Article							DISPLACEMENT; STRESS; EXCAVATION; SIMULATION; BEHAVIOR; FIELD	In the construction of mountain highway, in order to avoid complicated geology and adapt to the requirements of the terrain of the large height difference and the large slope, the double-line spiral tunnels are gradually applied. The purpose of this paper is to analyze the mechanical behavior of the double-line spiral tunnel and its surrounding rock under different line curvatures, and to obtain …	[Zhang, Chao; Wang, Chao; Niu, Xibin; Zhang, Shaoqiang] PowerChina Roadbridge Grp Co Ltd, Beijing 100048, Peoples R China; [Zhao, Huiling] Shanghai Univ, Dept Civil Engn, Shanghai 200444, Peoples R China	Zhao, HL (corresponding author), Shanghai Univ, Dept Civil Engn, Shanghai 200444, Peoples R China.	tjwangt@163.com; 1710200@tongji.edu.cn; 836059237@qq.com; 2383275675@qq.com; hlzhao@shu.edu.cn					Alsahly A, 2016, ADV ENG SOFTW, V100, P198, DOI 10.1016/j.advengsoft.2016.07.011; Chen B, 2011, APPL MECH MATER, V94-96, P1879, DOI 10.4028/www.scientific.net/AMM.94-96.1879; David M., 1987, TUNNELS TUNNELLING I, V16, P15; Fu JY, 2015, INT J NUMER ANAL MET, V39, P524, DOI 10.1002/nag.2322; Hao F., 2019, CIVIL ENG RES J, V7, DOI 10.19080/CERJ.2019.07.555720; He S., 2019, P 11 INT S HEAT VENT; Huyn…	26	0	0	3	3	HINDAWI LTD	LONDON	ADAM HOUSE, 3RD FLR, 1 FITZROY SQ, LONDON, W1T 5HF, ENGLAND	1687-8086	1687-8094		ADV CIV ENG	Adv. Civ. Eng.	DEC 17	2020	2020
J	Wang, XF; Lu, MY; Gao, YH; Luo, WB; Liu, WG				Wang, Xinfeng; Lu, Mingyuan; Gao, Yuhao; Luo, Wenbo; Liu, Wengang			Structural Mechanical Characteristics and Instability Law of Roof Key Block Breaking in Gob-Side Roadway	ADVANCES IN CIVIL ENGINEERING			English	Article								The influence of mining on the upper section of working face leads to the fracture of the lateral key block of the roof. From the goaf to the coal body, a group of "left-middle-right" key blocks are formed. According to the three different spatial position structure relations formed by roadway and broken key block in practical engineering, the mechanical causes of broken structure of key block in…	[Wang, Xinfeng; Lu, Mingyuan; Gao, Yuhao; Liu, Wengang] Xiangtan Univ, Coll Environm & Resources, Xiangtan 411105, Hunan, Peoples R China; [Wang, Xinfeng; Liu, Wengang] Anhui Univ Sci & Technol, Minist Educ, Key Lab Safety & High Efficiency Coal Min, Huainan 232001, Anhui, Peoples R China; [Wang, Xinfeng; Luo, Wenbo] Xiangtan Univ, Coll Civil Engn & Mech, Hunan Key Lab Geomech & Engn Safety, Xian…	Wang, XF (corresponding author), Xiangtan Univ, Coll Environm & Resources, Xiangtan 411105, Hunan, Peoples R China.; Wang, XF (corresponding author), Anhui Univ Sci & Technol, Minist Educ, Key Lab Safety & High Efficiency Coal Min, Huainan 232001, Anhui, Peoples R China.; Wang, XF (corresponding author), Xiangtan Univ, Coll Civil Engn & Mech, Hunan Key Lab Geomech & Engn Safety, Xiangtan 411105, …	wangxinfeng110@126.com; 1197660874@qq.com; 1102054569@qq.com; luowenbo@xtu.edu.cn; 1912882876@qq.com			National Natural Science Foundation of ChinaNational Natural Science Foundation of China (NSFC) [51904266]; Key Laboratory of Safety and High-Efficiency Coal Mining, Ministry of Education (Anhui University of Science and Technology) [JYBSYS2018203]; High-Level Talent Gathering Project in Hunan Province [2019RS1059]; Hunan Key Laboratory of Geomechanics and Engineering Safety [16GES10]	This study was financially supported by the National Natural Science Foundation of China (51904266); Key Laboratory of Safety and High-Efficiency Coal Mining, Ministry of Education (Anhui University of Science and Technology) (JYBSYS2018203); High-Level Talent Gathering Project in Hunan Province (2019RS1059); and Hunan Key Laboratory of Geomechanics and Engineering Safety (16GES10).	[冯国瑞 Feng Guorui], 2019, [采矿与安全工程学报, Journal of Mining & Safety Engineering], V36, P1109; [何富连 He Fulian], 2020, [煤炭学报, Journal of China Coal Society], V45, P2704; [何满潮 He Miannchao], 2005, [岩石力学与工程学报, Chinese Journal of Rock Mechanics and Engineering], V24, P2803; [何尚森 He Shangsen], 2016, [煤炭学报, Journal of China Coal Society], V41, P2596; HOU CJ, 1989, J CHINA COAL SOC, V4, P21; [阚甲广 Kan Jiaguan…	20	0	0	1	1	HINDAWI LTD	LONDON	ADAM HOUSE, 3RD FLR, 1 FITZROY SQ, LONDON, W1T 5HF, ENGLAND	1687-8086	1687-8094		ADV CIV ENG	Adv. Civ. Eng.	DEC 15	2020	2020
J	Liu, N; Huang, YX; Cai, W; Chen, K				Liu, Ning; Huang, Yi-Xiong; Cai, Wei; Chen, Kun			Application of Improved Single-Hole Superposition Theory in Nonequal Cross-Section Tunnel Intersection	ADVANCES IN CIVIL ENGINEERING			English	Article								With the excavation towards the intersecting tunnels' direction, the impact on the surrounding rock stress between the two tunnels will gradually decrease, but how it decreased is not clear. At present, engineers often directly superimpose the stress in the triangular area of the crossing tunnel when calculating the stress in this area (single-hole superposition theory). The theory is also used a…	[Liu, Ning; Huang, Yi-Xiong; Cai, Wei; Chen, Kun] Guizhou Univ, Sch Civil Engn, Guiyang, Peoples R China; [Liu, Ning] Guangxi Univ, Coll Civil Engn & Architecture, Nanning, Peoples R China	Liu, N (corresponding author), Guizhou Univ, Sch Civil Engn, Guiyang, Peoples R China.; Liu, N (corresponding author), Guangxi Univ, Coll Civil Engn & Architecture, Nanning, Peoples R China.	nliu1@gzu.edu.cn; redxiaxiong@163.com; cailaoban666666@163.com; 18785157908@163.com			Guizhou Province Basic Research Project [[2020]1Y250]; China Postdoctoral Science FoundationChina Postdoctoral Science Foundation [2017M622929]; Guizhou Province Science and Technology Support Plan Project [[2020]2Y036]; Guizhou University Talent Introduction Research Project [GDRGHZ(2017)62]; Guangxi University Open Project [2016ZDK012]; Guizhou Province Civil Engineering First Class [QYNYL[2017…	The authors gratefully acknowledge the support from the projects funded by the Guizhou Province Basic Research Project ([2020]1Y250), China Postdoctoral Science Foundation (No. 2017M622929), Guizhou Province Science and Technology Support Plan Project ([2020]2Y036), Guizhou University Talent Introduction Research Project (GDRGHZ(2017)62), Guangxi University Open Project(2016ZDK012) and Guizhou Pr…	Chen HW, 2018, ADV CIV ENG, V2018, DOI 10.1155/2018/4842308; Chen Z., 1994, ANAL METHODS ANAL RO; Chugh Y. R., P HARM ROCK ENG ENV; [董捷 Dong Jie], 2020, [铁道科学与工程学报, Journal of Rail Way Science and Engineering], V17, P947; Hao XJ, 2019, ADV CIV ENG, V2019, DOI 10.1155/2019/3439543; Lei MF, 2020, SHOCK VIB, V2020, DOI 10.1155/2020/2749540; Lei MF, 2020, EUR J ENVIRON CIV EN, V24, P1558, DOI 10.1080…	32	0	0	2	2	HINDAWI LTD	LONDON	ADAM HOUSE, 3RD FLR, 1 FITZROY SQ, LONDON, W1T 5HF, ENGLAND	1687-8086	1687-8094		ADV CIV ENG	Adv. Civ. Eng.	DEC 10	2020	2020
J	Xue, YG; Li, X; Li, GK; Qiu, DH; Gong, HM; Kong, FM				Xue, Yiguo; Li, Xin; Li, Guangkun; Qiu, Daohong; Gong, Huimin; Kong, Fanmeng			An analytical model for assessing soft rock tunnel collapse risk and its engineering application	GEOMECHANICS AND ENGINEERING			English	Article						soft rock tunnel; collapse risk factors; combination weights method; soft rock tunnel collapse; fuzzy evaluation model	LANDSLIDE SUSCEPTIBILITY; STABILITY; FAILURE; STRENGTH; METHODOLOGY; MASS	The tunnel collapse, large deformation of surrounding rock, water and mud inrush are the major geological disasters in soft rock tunnel construction. Among them, tunnel collapse has the most serious impact on tunnel construction. Current research backed theories have certain limitations in identifying the collapse risk of soft rock tunnels Examining the Zhengwan high-speed railway tunnel, eight s…	[Xue, Yiguo; Li, Guangkun; Qiu, Daohong; Gong, Huimin; Kong, Fanmeng] Shandong Univ, Geotech & Struct Engn Res Ctr, Jinan, Shandong, Peoples R China; [Li, Xin] Shandong Univ, Inst Marine Sci & Technol, Qingdao, Shandong, Peoples R China	Xue, YG (corresponding author), Shandong Univ, Geotech & Struct Engn Res Ctr, Jinan, Shandong, Peoples R China.	xieagle@sdu.edu.cn			National Natural Science Foundation of ChinaNational Natural Science Foundation of China (NSFC) [51379112, 51422904, 41877239, 41772298]; State Key Development Program for Basic Research of ChinaState Key Development Program for Basic Research of China [2013CB036002]; Fundamental Research Funds for the Central UniversitiesFundamental Research Funds for the Central Universities [2018JC044]; Natura…	Much of the work presented in this paper was supported by the National Natural Science Foundation of China (grant numbers 51379112, 51422904, 41877239 and 41772298), and the State Key Development Program for Basic Research of China (grant number 2013CB036002), and Fundamental Research Funds for the Central Universities (grant number 2018JC044), and Natural Science Foundation of Shandong Province …	Aalianvari A, 2012, ARAB J GEOSCI, V5, P275, DOI 10.1007/s12517-010-0172-8; Aliabadian Z, 2015, ARAB J GEOSCI, V8, P1229, DOI 10.1007/s12517-014-1286-1; Aliyu MM, 2019, INT J ROCK MECH MIN, V113, P310, DOI 10.1016/j.ijrmms.2018.12.002; Bakun-Mazor D, 2009, INT J ROCK MECH MIN, V46, P262, DOI 10.1016/j.ijrmms.2008.04.001; Benardos AG, 2004, INT J ROCK MECH MIN, V41, P987, DOI 10.1016/j.ijrmms.2004…	38	0	0	45	45	TECHNO-PRESS	DAEJEON	PO BOX 33, YUSEONG, DAEJEON 305-600, SOUTH KOREA	2005-307X	2092-6219		GEOMECH ENG	Geomech. Eng.	DEC 10	2020	23	5
J	Yang, J; Yang, XG; Zhou, JW; Liu, Y; Dong, BS; Li, HB				Yang, Jing; Yang, Xing-Guo; Zhou, Jia-Wen; Liu, Yong; Dong, Bao-Shun; Li, Hai-Bo			Comparative Study of the Excavation Damage and Rockburst of the Deeply Buried Jinping II Diversion Tunnels Using a TBM and the Drilling-Blasting Method	ADVANCES IN CIVIL ENGINEERING			English	Article							DISTURBED ZONE; LARGE-SCALE; ROCK; FAILURE; MECHANISMS	The rock mass failure induced by high in-situ stresses during the excavation of deep diversion tunnels is one of the key problems in the construction of the Jinping II Hydropower Station. Based on the results of acoustic wave tests and rockburst statistical analysis conducted, this study focuses on the excavation damaged zone (EDZ) and rockburst events in the Jinping II diversion tunnels excavate…	[Yang, Jing; Yang, Xing-Guo; Li, Hai-Bo] Sichuan Univ, Coll Water Resource & Hydropower, Chengdu 610065, Peoples R China; [Yang, Jing; Liu, Yong] Huaneng Tibet Yarlung Zangbo River Hydropower Dev, Chengdu 610061, Peoples R China; [Zhou, Jia-Wen] Sichuan Univ, State Key Lab Hydraul & Mt River Engn, Chengdu 610065, Peoples R China; [Dong, Bao-Shun] PowerChina Huadong Engn Co Ltd, Hangzhou 311122, Z…	Li, HB (corresponding author), Sichuan Univ, Coll Water Resource & Hydropower, Chengdu 610065, Peoples R China.	2015323060025@stu.scu.edu.cn; yangxingguo@scu.edu.cn; jwzhou@scu.edu.cn; 13808063477@163.com; dong_bs@ecidi.com; hbli@scu.edu.cn	Zhou, Jia-wen/A-7807-2012	Zhou, Jia-wen/0000-0002-6817-1071	Graduate Student's Research Innovation Foundation of Sichuan University [2018YJSY076]; Science Foundation for Excellent Youth Scholars of Sichuan University [2013SCU04A07]	The authors gratefully thank the support of the Graduate Student's Research Innovation Foundation of Sichuan University (2018YJSY076) and the Science Foundation for Excellent Youth Scholars of Sichuan University (2013SCU04A07). The authors also thank LetPub (www.letpub.com) for its linguistic assistance during the preparation of this manuscript.	[Anonymous], 2006, 5028799 GB CHIN MIN; [Anonymous], 2007, DLT53892007 DEV REF; [Anonymous], 2008, 504872008 GB MIN HOU; Barton N, 2007, ROCK QUALITY SEISMIC; Barton N. R., 2000, TBM TUNNELLING JOINT, P3; Cai M, 2008, INT J ROCK MECH MIN, V45, P763, DOI 10.1016/j.ijrmms.2007.07.026; Chen YF, 2015, TUNN UNDERGR SP TECH, V49, P253, DOI 10.1016/j.tust.2015.05.007; Deng JH, 2001, CAN GEOTECH J, V38, …	37	0	0	9	9	HINDAWI LTD	LONDON	ADAM HOUSE, 3RD FLR, 1 FITZROY SQ, LONDON, W1T 5HF, ENGLAND	1687-8086	1687-8094		ADV CIV ENG	Adv. Civ. Eng.	DEC 9	2020	2020
J	Zhang, Q; Huang, BX; He, MC; Guo, S				Zhang, Quan; Huang, Bingxiang; He, Manchao; Guo, Shan			A Numerical Investigation on the Hydraulic Fracturing Effect of Water Inrush during Tunnel Excavation	GEOFLUIDS			English	Article							SANDSTONES; PRESSURE; WIDTH	When a high-pressure water source is located near a tunnel under excavation, water inrush is commonly associated with a hydraulic fracturing effect. To study the hydraulic fracturing effect of water inrush (HFEWI), flow-rock failure process analysis (F-RFPA(2D)) was adopted to simulate the water inrush process. The simulated results indicated that a stress disturbance area formed in front of the …	[Zhang, Quan; Huang, Bingxiang] China Univ Min & Technol, State Key Lab Coal Resources & Safe Min, Xuzhou 221116, Jiangsu, Peoples R China; [Zhang, Quan] China Univ Min & Technol, Sch Mines, Xuzhou 221116, Jiangsu, Peoples R China; [Zhang, Quan; He, Manchao; Guo, Shan] China Univ Min & Technol, State Key Lab Geomech & Deep Underground Engn, Beijing 100083, Peoples R China	Zhang, Q; Huang, BX (corresponding author), China Univ Min & Technol, State Key Lab Coal Resources & Safe Min, Xuzhou 221116, Jiangsu, Peoples R China.; Zhang, Q (corresponding author), China Univ Min & Technol, Sch Mines, Xuzhou 221116, Jiangsu, Peoples R China.; Zhang, Q (corresponding author), China Univ Min & Technol, State Key Lab Geomech & Deep Underground Engn, Beijing 100083, Peoples R Ch…	zhangquan@cumt.edu.cn; huangbxcumt@outlook.com; manchaohe@yeah.net; 1940408206@qq.com		zhang, quan/0000-0002-9392-6261	National Key Research and Development Program of China [2016YFC0600901]; National Natural Science Foundation of ChinaNational Natural Science Foundation of China (NSFC) [41941018]	The authors gratefully acknowledge the financial support from the National Key Research and Development Program of China (No. 2016YFC0600901), and the National Natural Science Foundation of China (No. 41941018).	Biot MA, 1941, J APPL PHYS, V12, P155, DOI 10.1063/1.1712886; [陈忠辉 Chen Zhonghui], 2011, [中国矿业大学学报. 自然科学版, Journal of China University of Mining & Technology], V40, P673; Chu M. X., 2003, COAL SCI TECHNOLOGY, V31, P53; Dong X, 2017, OPEN GEOSCI, V9, P186, DOI 10.1515/geo-2017-0016; GEERTSMA J, 1969, J PETROL TECHNOL, V21, P1571, DOI 10.2118/2458-PA; [郭佳奇 Guo Jiaqi], 2012, [铁道学报, Journal of the Ch…	40	1	1	9	9	WILEY-HINDAWI	LONDON	ADAM HOUSE, 3RD FL, 1 FITZROY SQ, LONDON, WIT 5HE, ENGLAND	1468-8115	1468-8123		GEOFLUIDS	Geofluids	DEC 9	2020	2020
J	Lei, Z; Chen, Q; Zhao, W; Li, YJ; Gao, ZH				Lei, Zhen; Chen, Qing; Zhao, Wen; Li, Yu-Jing; Gao, Zheng-Hua			Dynamic Response Characteristics of the Structures under Excavation by High-Efficiency Blasting in the Urban Ultradeep Foundation Pit	SHOCK AND VIBRATION			English	Article								To ensure the safe and efficient excavation of ultradeep foundation pits in a complex urban environment, the ultradeep foundation pit excavation project of Liuguangmen Urban Complex in Guiyang City was taken as the study point. A high-efficiency blasting method was proposed for the excavation of vibration-isolating slot and electronic detonators, and a three-dimensional spatial calculation model …	[Lei, Zhen] Guizhou Inst Technol, Min Coll, Guiyang 550025, Peoples R China; [Chen, Qing] Publ Secur Corps Guizhou Prov Publ Securit Dept, Guiyang 550001, Peoples R China; [Zhao, Wen; Li, Yu-Jing] Guizhou Kaiyuan Blasting Engn Co Ltd, Guiyang 551400, Peoples R China; [Gao, Zheng-Hua] China Univ Min & Technol, Dept Mech & Civil Engn, Beijing 100083, Peoples R China	Gao, ZH (corresponding author), China Univ Min & Technol, Dept Mech & Civil Engn, Beijing 100083, Peoples R China.	52337741@qq.com; 1142564370@qq.com; 741037778@qq.com; 312997137@qq.com; 837224105@qq.com			National Natural Science Foundation of ChinaNational Natural Science Foundation of China (NSFC) [51664007]	This study was supported by the National Natural Science Foundation of China (Grant no. 51664007).	Dowding CH, 2016, ROCK MECH ROCK ENG, V49, P4073, DOI 10.1007/s00603-016-0921-4; Gao BY, 2011, INT J ENVIRON POLLUT, V45, P58, DOI 10.1504/IJEP.2011.039085; [高坛 Gao Tan], 2017, [安全与环境学报, Journal of Safety and Environment], V17, P2191; Kong D. D., 2005, J SHENYANG JIANZHU U, V21, P122; Li Y. J., 2019, ENG BLASTING, V25, P42, DOI [10.3969/j.issn.1006-7051.2019.05.007, DOI 10.3969/J.ISSN.1006-7051.2…	20	0	0	3	3	HINDAWI LTD	LONDON	ADAM HOUSE, 3RD FLR, 1 FITZROY SQ, LONDON, W1T 5HF, ENGLAND	1070-9622	1875-9203		SHOCK VIB	Shock Vib.	DEC 9	2020	2020
J	Peng, SQ; Zhang, KJ; Fan, L; Kang, JY; Peng, K; Wang, F				Peng, Shuquan; Zhang, Kejia; Fan, Ling; Kang, Jingyu; Peng, Kang; Wang, Fan			Permeability Reduction and Electrochemical Impedance of Fractured Rock Grouted by Microbial-Induced Calcite Precipitation	GEOFLUIDS			English	Article							MODEL; FLOW	The poor impermeability of fractured rock induced by excavation and construction is improved through the application of microbial-induced calcite precipitation (MICP), but it is difficult to monitor and evaluate the permeability reduction under a confining pressure and fracture aperture. For this, the grouting ratio, permeability, and electrochemical impedance of fractured rock with MICP grouting…	[Peng, Shuquan; Zhang, Kejia; Fan, Ling; Peng, Kang; Wang, Fan] Cent South Univ, Sch Resource & Safety Engn, Changsha 410083, Hunan, Peoples R China; [Kang, Jingyu] Chinese Acad Sci, Inst Rock & Soil Mech, State Key Lab Geomech & Geotech Engn, Wuhan 430071, Peoples R China; [Kang, Jingyu] Univ Chinese Acad Sci, Sch Engn Sci, Beijing 100049, Peoples R China	Fan, L (corresponding author), Cent South Univ, Sch Resource & Safety Engn, Changsha 410083, Hunan, Peoples R China.	pqr97linger@csu.edu.cn; zhangkejia@csu.edu.cn; pqrfanlinger@csu.edu.cn; 1045398191@qq.com; pengkang2020@csu.edu.cn; wangf_xnz@csu.edu.cn		peng, shuquan/0000-0002-6702-1004	National Natural Science Foundation of ChinaNational Natural Science Foundation of China (NSFC) [51674287, 51508579, 51974043, 51774058]; Chongqing Basic and Frontier Research Project [cstc2018jcyjA3320]	This study was funded by the National Natural Science Foundation of China (grant #51674287, #51508579, #51974043, and #51774058), and Chongqing Basic and Frontier Research Project (grant #cstc2018jcyjA3320).	Akhavan A, 2017, J MATER CIVIL ENG, V29, DOI 10.1061/(ASCE)MT.1943-5533.0001964; Al Qabany A, 2012, J GEOTECH GEOENVIRON, V138, P992, DOI 10.1061/(ASCE)GT.1943-5606.0000666; Chen JG, 2006, ROCK SOIL MECH, V27, P577; Cheng Y. J., 1994, CHINESE J GEOTECHNIC, V16, P22; Choi SG, 2020, CONSTR BUILD MATER, V246, DOI 10.1016/j.conbuildmat.2020.118415; Choi SG, 2017, CEMENT CONCRETE COMP, V83, P209, DOI …	32	0	0	7	7	WILEY-HINDAWI	LONDON	ADAM HOUSE, 3RD FL, 1 FITZROY SQ, LONDON, WIT 5HE, ENGLAND	1468-8115	1468-8123		GEOFLUIDS	Geofluids	DEC 8	2020	2020
J	Shi, LQ; Xu, DJ				Shi, Longqing; Xu, Dongjing			Effects of Flaw Geometry on the Fracturing Behavior of Rock-Like Materials Containing Two Arch-Like Parallelogram Flaws	ADVANCES IN CIVIL ENGINEERING			English	Article							CRACK COALESCENCE; MODEL; BRITTLE; PROPAGATION; SPECIMENS; STRATA; FLOW	To increase understanding of the strength and failure mechanism of rocks with arch-like fractures generated in the overlying strata above a gob during coal mining, a series of uniaxial compression tests on rock-like specimens containing two preexisting parallelogram flaws at inclination angles varying from 45 degrees to 75 degrees were made using a rock mechanics servocontrolled testing system. B…	[Shi, Longqing; Xu, Dongjing] Shandong Univ Sci & Technol, Shandong Prov Key Lab Deposit Mineralizat & Sedim, Qingdao 266590, Peoples R China; [Shi, Longqing; Xu, Dongjing] Shandong Univ Sci & Technol, Coll Earth Sci & Engn, Qingdao 266590, Peoples R China	Xu, DJ (corresponding author), Shandong Univ Sci & Technol, Shandong Prov Key Lab Deposit Mineralizat & Sedim, Qingdao 266590, Peoples R China.; Xu, DJ (corresponding author), Shandong Univ Sci & Technol, Coll Earth Sci & Engn, Qingdao 266590, Peoples R China.	1025198205@qq.com; xudongjinggg@126.com			National Natural Science Foundation ProgramNational Natural Science Foundation of China (NSFC) [41572244, 41807283, 51804184]; Natural Science Foundation of Shandong ProvinceNatural Science Foundation of Shandong Province [ZR2015DM013]; Scientific Research Foundation of Shandong University of Science and Technology for Recruited Talents [2017RCJJ031]; Open Fund of State Key Laboratory of Coal Res…	This work was financially supported by the National Natural Science Foundation Program under Grant nos. 41572244, 41807283, and 51804184, the Natural Science Foundation of Shandong Province under Grant no. ZR2015DM013, the Scientific Research Foundation of Shandong University of Science and Technology for Recruited Talents under Grant no. 2017RCJJ031, Open Fund of State Key Laboratory of Coal Res…	Al-Khattaf S, 2018, ENERG FUEL, V32, P6189, DOI 10.1021/acs.energyfuels.8b00691; CANNON NP, 1990, ACTA METALL MATER, V38, P1955, DOI 10.1016/0956-7151(90)90307-3; Cao P, 2015, ENG GEOL, V187, P113, DOI 10.1016/j.enggeo.2014.12.010; Feng XT, 2009, INT J ROCK MECH MIN, V46, P159, DOI 10.1016/j.ijrmms.2008.08.001; Fujii Y, 2004, INT J ROCK MECH MIN, V41, P1035, DOI 10.1016/j.ijrmms.2004.04.001; Haer…	31	0	0	1	1	HINDAWI LTD	LONDON	ADAM HOUSE, 3RD FLR, 1 FITZROY SQ, LONDON, W1T 5HF, ENGLAND	1687-8086	1687-8094		ADV CIV ENG	Adv. Civ. Eng.	DEC 7	2020	2020
J	Sun, ML; Zhu, YQ; Li, XZ; Zhu, ZG; He, BG				Sun, Minglei; Zhu, Yongquan; Li, Xinzhi; Zhu, Zhengguo; He, Benguo			Experimental Study of Mechanical Characteristics of Tunnel Support System in Hard Cataclastic Rock with High Geostress	SHOCK AND VIBRATION			English	Article								In hard cataclastic surrounding rock with high geostress, the rock monomer strength is high and the rock is broken, and tunnel excavation in it is apt to cause large deformation, collapsing, and breaking, causing initial support crack and even intruding of the initial support deformation. The characteristics of the support system under different support parameters and shapes are analyzed, and the…	[Sun, Minglei; Zhu, Yongquan; Li, Xinzhi; Zhu, Zhengguo] Shijiazhuang Tiedao Univ, State Key Lab Mech Behav & Syst Safety Traff Engn, Shijiazhuang 050043, Hebei, Peoples R China; [Sun, Minglei; Zhu, Zhengguo] Hebei Prov Tech Innovat Ctr Safe & Effect Min Met, Shijiazhuang 050043, Hebei, Peoples R China; [He, Benguo] Northeastern Univ, Minist Educ Safe Min Deep Met Mines, Key Lab, Shenyang 110819,…	Li, XZ (corresponding author), Shijiazhuang Tiedao Univ, State Key Lab Mech Behav & Syst Safety Traff Engn, Shijiazhuang 050043, Hebei, Peoples R China.	hshaocun@163.com			National Natural Science Foundation of China (NSFC)National Natural Science Foundation of China (NSFC) [51778380]; Key Research and Development Program of Hebei Province [17275408D]; Science and Technology Research Project of Hebei Province [ZD2019034]	This work was supported by National Natural Science Foundation of China (NSFC) under Grant no. 51778380, the Key Research and Development Program of Hebei Province under Grant no. 17275408D, and the Science and Technology Research Project of Hebei Province under Grant no. ZD2019034.	BROCH E, 1984, ROCK MECH ROCK ENG, V17, P15, DOI 10.1007/BF01088368; Cao X., 2018, J RAILWAY ENG SOC, V35, P65; He MC, 2010, INT J ROCK MECH MIN, V47, P286, DOI 10.1016/j.ijrmms.2009.09.003; Hoek E., 1980, UNDERGROUND EXCAVATI; [黄明利 Huang Mingli], 2016, [现代隧道技术, Modern Tunnelling Technology], V53, P89; Lei L. I., 2018, CHINA CIVIL ENG J, V37, P3593; Lei SX, 2020, ROCK SOIL MECH, V41, P1039, DOI 1…	17	0	0	4	4	HINDAWI LTD	LONDON	ADAM HOUSE, 3RD FLR, 1 FITZROY SQ, LONDON, W1T 5HF, ENGLAND	1070-9622	1875-9203		SHOCK VIB	Shock Vib.	DEC 4	2020	2020
J	Qi, XY; Wang, RJ; Mi, WT				Qi, Xueyuan; Wang, Ruijie; Mi, Wentian			Failure Characteristics and Control Technology of Surrounding Rock in Deep Coal Seam Roadway with Large Dip Angle under the Influence of Weak Structural Plane	ADVANCES IN CIVIL ENGINEERING			English	Article							MECHANISM	In view of the unsymmetrical large deformation and failure phenomenon that often occurs after the excavation and support of the roadway in steep seam with weak structural plane, the numerical simulation analysis and engineering application research on the deformation and failure characteristics of its surrounding rock are carried out. The results show that the key position of asymmetric deformati…	[Qi, Xueyuan] Xian Univ Sci & Technol, Coll Energy Sci & Engn, Xian 710054, Peoples R China; [Qi, Xueyuan; Mi, Wentian] Inner Mongolia Univ Technol, Sch Mines, Hohhot 010051, Peoples R China; [Wang, Ruijie] China Univ Min & Technol, State Key Lab Coal Resources & Safe Min, Xuzhou 221116, Jiangsu, Peoples R China	Mi, WT (corresponding author), Inner Mongolia Univ Technol, Sch Mines, Hohhot 010051, Peoples R China.	miwentian1982@imut.edu.cn			Natural Science Foundation of Inner Mongolia Autonomous Region [2020MS04009]; Science research project of Inner Mongolia University of Technology [2016030092]	This research is supported by the Natural Science Foundation of Inner Mongolia Autonomous Region (no. 2020MS04009) and Science research project of Inner Mongolia University of Technology (No. 2016030092).	Dong Y., 2019, RES ASYMMETRIC DEFOR; [樊克恭 FAN Kegong], 2007, [中国矿业大学学报. 自然科学版, Journal of China University of Mining & Technology. Natural science], V36, P54; Hu S., 2018, STUDY STABILITY ANAL; Hu SX, 2018, INT J MIN SCI TECHNO, V28, P533, DOI 10.1016/j.ijmst.2017.10.001; Kulatilake PHSW, 2013, INT J MIN SCI TECHNO, V23, P579, DOI 10.1016/j.ijmst.2013.07.018; Li X. M., 2015, P 2015 INT C MAN SCI;…	20	0	0	5	5	HINDAWI LTD	LONDON	ADAM HOUSE, 3RD FLR, 1 FITZROY SQ, LONDON, W1T 5HF, ENGLAND	1687-8086	1687-8094		ADV CIV ENG	Adv. Civ. Eng.	DEC 3	2020	2020
J	Zhou, YH; Hu, QX; Liu, WT; Wu, ZQ; Yan, YL; Ma, JL				Yuhui, Zhou; Qingxiong, Hu; Wentao, Liu; Zhiqi, Wu; Yule, Yan; Jialing, Ma			Study on the Origin and Fluid Identification of Low-Resistance Gas Reservoirs	GEOFLUIDS			English	Article								The Wu 2 section of the Ke017 well block is a low-resistance gas reservoir with ultralow porosity and low permeability. The comprehensive analysis of rock lithology, physical properties, sedimentary characteristics, and gas content demonstrated that the development of micropores in illite/smectite dominated clay minerals together with the resulted additional conductivity capability and complex re…	[Yuhui, Zhou; Jialing, Ma] Yangtze Univ, Wuhan 430100, Hubei, Peoples R China; [Yuhui, Zhou; Yule, Yan] Natl Coal Chem Prod Qual Supervis & Inspect Ctr, Huainan 232001, Anhui, Peoples R China; [Qingxiong, Hu] PetroChina Xinjiang Oilfield Co, Oil Prod Plant 1, Karamay 834000, Xinjiang, Peoples R China; [Wentao, Liu] PetroChina, Xinjiang Oilfield Co, Res Inst Explorat & Dev, Karamay 834000, Xinjian…	Zhou, YH (corresponding author), Yangtze Univ, Wuhan 430100, Hubei, Peoples R China.; Zhou, YH (corresponding author), Natl Coal Chem Prod Qual Supervis & Inspect Ctr, Huainan 232001, Anhui, Peoples R China.	zhyhtree@yangtzeu.edu.cn; 669230374@qq.com; wentao-211@163.com; 190251456@qq.com; 56762213@qq.com; 799738054@qq.com		Zhou, Yuhui/0000-0001-7843-8959			China Petroleum Exploration and production Corporation, 2006, WELL LOGG ID METH TE; Duan X. G., 2011, J CHENGDU U TECHNOLO, V32, P124; He B., 2019, UNCONVENTIONAL OIL G, V6, P29; Jin W., 2010, RES GAS WATER DISTRI; Li Q, 2009, J I TELECOMMUN PROF, V3, P43; Li Y., 2009, NATURAL GAS EXPLORAT, V32, P12; Luo N., 2010, NATURAL GAS EXPLORAT, V33, P26; Luo Shuiliang, 2014, Natural Gas Industry, V34, P41…	21	0	0	0	0	WILEY-HINDAWI	LONDON	ADAM HOUSE, 3RD FL, 1 FITZROY SQ, LONDON, WIT 5HE, ENGLAND	1468-8115	1468-8123		GEOFLUIDS	Geofluids	DEC 2	2020	2020
J	Di Bella, M; Mastelloni, MA; Italiano, F; Tripodo, A; Quartieri, S; Magazu, S; Sabatino, G				Di Bella, Marcella; Mastelloni, Maria Amalia; Italiano, Francesco; Tripodo, Alessandro; Quartieri, Simona; Magazu, Salvatore; Sabatino, Giuseppe			Archaeometric constraints on the architectural from the submerged installation discovered at the harbor of Lipari (Aeolian Archipelago, Italy)	PERIODICO DI MINERALOGIA			English	Article						Lipari Island; harbor installation; Roman age; petrography; SEM-EDX; Tyrrhenian Sea	EVOLUTION; ISLANDS; ARC	Submarine surveys, started in 2008 during the preliminary excavations preceding the construction of a new pier in the port of Lipari Island (Italy), brought to light the presence of large submerged remains, dated to the Roman age, in the base of typological features of the related pottery fragment styles. The archaeological discoveries included the find of structural elements - interpreted in the…	[Di Bella, Marcella; Italiano, Francesco] Natl Inst Geophys & Volcanol INGV, Palermo Sect, Via Ugo La Malfa 153, I-98057 Milazzo, ME, Italy; [Mastelloni, Maria Amalia] Archaeol Museum L Bernabo Brea, Reg Pole Isole Eolie, Via Castello, Lipari, Italy; [Tripodo, Alessandro; Quartieri, Simona; Magazu, Salvatore; Sabatino, Giuseppe] Univ Messina, Phys Sci & Earth Sci MIFT, Dept Math & Comp Sci, V Sta…	Di Bella, M (corresponding author), Natl Inst Geophys & Volcanol INGV, Palermo Sect, Via Ugo La Malfa 153, I-98057 Milazzo, ME, Italy.	marcella.dibella@ingv.it					Anzidei M, 2016, QUATERN INT, V401, P162, DOI 10.1016/j.quaint.2015.07.003; BARBERI F, 1974, EARTH PLANET SC LETT, V21, P269, DOI 10.1016/0012-821X(74)90161-7; BARKER DS, 1987, CONTRIB MINERAL PETR, V97, P460, DOI 10.1007/BF00375324; Bernabo Brea L., 1980, LACROPOLI LIPARI NEL; Bernabo Brea L., 2003, QUADERNI ARCHEOLOGIA, V4, P5; Bernabo Brea L., 2001, MELIGUNIS LIPARA; Bernabo Brea L., 1985, ARC…	37	0	0	0	0	EDIZIONI NUOVA CULTURA	ROME	PIAZZALE ALDO MORO 5, ROME, I-00185, ITALY	0369-8963			PERIOD MINERAL	Period. Mineral.	DEC	2020	89	3
J	Hu, YB; Li, WP; Wang, QQ; Liu, SL				Hu, Yanbo; Li, Wenping; Wang, Qiqing; Liu, Shiliang			Vertical Shaft Excavation Shaping and Surrounding Rock Control Technology Under the Coupling Action of High Ground Stress and Fracture Formation	JOURNAL OF PERFORMANCE OF CONSTRUCTED FACILITIES			English	Article						Mechanical model; Construction technology; Ventilation shaft		The stability discrimination method of surrounding rock in vertical shaft construction and the safety technology of shaft construction under the geological condition of a super-thick crush belt were studied. Through the establishment of a shaft surrounding rock mechanical model, quantitative analysis was conducted on the displacement of broken surrounding rock during shaft construction under the …	[Hu, Yanbo] Nanjing Tech Univ, Sch Transportat Engn, Nanjing 211816, Jiangsu, Peoples R China; [Li, Wenping; Wang, Qiqing] China Univ Min & Technol, Sch Resources & Geosci, Xuzhou 221116, Jiangsu, Peoples R China; [Liu, Shiliang] Shandong Univ, Sch Civil Engn, Jinan 250100, Shandong, Peoples R China	Li, WP (corresponding author), China Univ Min & Technol, Sch Resources & Geosci, Xuzhou 221116, Jiangsu, Peoples R China.	huyanbo@cumt.edu.cn; wplicumt@126.com; 1537267558@qq.com; 161317531@qq.com			National Basic Research Program of China (973 Program)National Basic Research Program of China [2015CB251601]; State Key Program of the National Natural Science Foundation of ChinaNational Natural Science Foundation of China (NSFC) [41430643]; Fundamental Research Funds for the Central UniversitiesFundamental Research Funds for the Central Universities [2017XKZD07]	This work was supported by the National Basic Research Program of China (973 Program) under Grant No. 2015CB251601, the State Key Program of the National Natural Science Foundation of China under Grant No. 41430643, and the Fundamental Research Funds for the Central Universities under Grant No. 2017XKZD07.	Baron I, 2019, ENG GEOL, V261, DOI 10.1016/j.enggeo.2019.105284; Bi T.F., 2015, THESIS LIAONING U TE; Bourne-Webb PJ, 2009, GEOTECHNIQUE, V59, P237, DOI 10.1680/geot.2009.59.3.237; Bym T, 2013, GEOTECHNIQUE, V63, P791, DOI 10.1680/geot.12.T.003; [曹树刚 Cao Shugang], 2014, [岩石力学与工程学报, Chinese Journal of Rock Mechanics and Engineering], V33, P1536; Cheng WC, 2018, TUNN UNDERGR SP TECH, V71, P494, DOI…	45	0	0	9	9	ASCE-AMER SOC CIVIL ENGINEERS	RESTON	1801 ALEXANDER BELL DR, RESTON, VA 20191-4400 USA	0887-3828	1943-5509		J PERFORM CONSTR FAC	J. Perform. Constr. Facil.	DEC 1	2020	34	6
J	Guo, TK; Tang, SJ; Liu, S; Liu, XQ; Zhang, W; Qu, GZ				Guo, Tiankui; Tang, Songjun; Liu, Shun; Liu, Xiaoqiang; Zhang, Wei; Qu, Guanzheng			Numerical simulation of hydraulic fracturing of hot dry rock under thermal stress	ENGINEERING FRACTURE MECHANICS			English	Article						Hot dry rock; Hydraulic fracturing; Thermal stress; THMD coupling model; Numerical simulation	ENHANCED GEOTHERMAL SYSTEMS; EXCAVATION DAMAGED ZONE; PROPAGATION; MODEL; SHALE; EGS; PERFORMANCE; BEHAVIOR	y The hot dry rock (HDR) hydraulic fracturing is a complex physical process coupling the effects of seepage, stress, temperature, and damage. The high temperature and brittleness of the HDR leads to the great thermal stress, and the rock is possibly thermally damaged, thus promoting hydraulic fracture (HF) extension and significantly improving the permeability around the HF. In this paper, a ther…	[Guo, Tiankui; Tang, Songjun; Liu, Xiaoqiang] China Univ Petr, Coll Petr Engn, Huadong 266580, Peoples R China; [Liu, Shun; Qu, Guanzheng] Xian Shiyou Univ, Coll Petr Engn, Xian 710065, Shaanxi, Peoples R China; [Zhang, Wei] Shandong Univ Sci & Technol, Dept Resource Engn, Qingdao 266590, Shandong, Peoples R China	Guo, TK (corresponding author), China Univ Petr, Coll Petr Engn, Huadong 266580, Peoples R China.; Liu, S (corresponding author), Xian Shiyou Univ, Coll Petr Engn, Xian 710065, Shaanxi, Peoples R China.	guotiankui@126.com; S18020045@s.upc.edu.cn; liushun631@163.com; 1105150696@qq.com; 1557859787@qq.com; quguanzheng@126.com	Liu, shun/AAM-6843-2021		National Natural Science Foundation of ChinaNational Natural Science Foundation of China (NSFC) [51874338, ZR2019QEE005]; Shandong Provincial Natural Science FoundationNatural Science Foundation of Shandong Province; Shaanxi Provincial Education Department's Scientific Research Program [18JK0611]	The authors would like to acknowledge the financial support of the National Natural Science Foundation of China (Grant No.51874338), and express their gratitude to project ZR2019QEE005 supported by Shandong Provincial Natural Science Foundation and the project supported by the Shaanxi Provincial Education Department's Scientific Research Program (18JK0611).	[Anonymous], 2020, COMSOL MULT US GUID; Bary B, 2008, INT J HEAT MASS TRAN, V51, P2847, DOI 10.1016/j.ijheatmasstransfer.2007.09.021; Bujakowski W, 2015, RENEW ENERG, V80, P441, DOI 10.1016/j.renene.2015.02.018; Chen H.-Y., 1995, SPE ANN TECHN C EXH, DOI [10.2118/30752-MS, DOI 10.2118/30752-MS]; Ghassemi A, 2004, ENG ANAL BOUND ELEM, V28, P1363, DOI 10.1016/j.enganabound.2004.05.003; Guo TK, 2020…	42	0	0	13	13	PERGAMON-ELSEVIER SCIENCE LTD	OXFORD	THE BOULEVARD, LANGFORD LANE, KIDLINGTON, OXFORD OX5 1GB, ENGLAND	0013-7944	1873-7315		ENG FRACT MECH	Eng. Fract. Mech.	DEC	2020	240
J	Shan, Z; Porter, I; Nemcik, J; Baafi, E				Shan, Z.; Porter, I; Nemcik, J.; Baafi, E.			Beam enhancement capacity of a thin fibre-reinforced polymer liner	GEOTECHNIQUE LETTERS			English	Article						deformation; laboratory tests; rocks/rock mechanics	STRENGTH	This study investigates a glass-reinforced polymeric thin spray-on liner and its ability to reinforce substrate surface in underground excavations by the use of laboratory testing. Twenty-three hydrostone beams uncoated and coated with 5 mm thick fibre-reinforced polymer (FRP) coating were subjected to four-point bending tests to study their strength. The hydrostone beams coated with FRP experien…	[Shan, Z.; Porter, I; Nemcik, J.; Baafi, E.] Univ Wollongong, Fac Engn & Informat Sci, Sch Civil Min & Environm Engn, Wollongong, NSW, Australia	Shan, Z (corresponding author), Univ Wollongong, Fac Engn & Informat Sci, Sch Civil Min & Environm Engn, Wollongong, NSW, Australia.						Adsam Gideon D. S., 2018, IOP Conference Series: Materials Science and Engineering, V431, DOI 10.1088/1757-899X/431/7/072006; Ahn T.S, 2011, THESIS; Archibald J. F., 2004, SURFACE SUPPORT MINI, P73; Brady BH, 2006, ROCK MECH UNDERGROUN; COQUARD P, 1994, INT J ROCK MECH MIN, V31, P517, DOI 10.1016/0148-9062(94)90153-8; Espley S. J., 2004, SURFACE SUPPORT MINI, P205; Fanning PJ, 2001, J COMPOS CONS…	33	0	0	11	11	ICE PUBLISHING	WESTMINISTER	INST CIVIL ENGINEERS, 1 GREAT GEORGE ST, WESTMINISTER SW 1P 3AA, ENGLAND	2049-825X	2045-2543		GEOTECH LETT	Geotech. Lett.	DEC	2020	10	4
J	Ma, HS; Wang, J; Man, K; Chen, L; Gong, QM; Zhao, XG				Ma, Hongsu; Wang, Ju; Man, Ke; Chen, Liang; Gong, Qiuming; Zhao, Xingguang			Excavation of underground research laboratory ramp in granite using tunnel boring machine: Feasibility study	JOURNAL OF ROCK MECHANICS AND GEOTECHNICAL ENGINEERING			English	Article						Underground research laboratory (URL); High-level radioactive waste (HLW) disposal; Tunnel boring machine (TBM); Extremely hard rock mass; Rock mass boreability; Spiral layout; Beishan	TBM PERFORMANCE PREDICTION; LEVEL RADIOACTIVE-WASTE; CONFINING STRESS; CUTTING TESTS; GEOLOGICAL DISPOSAL; PENETRATION RATE; ROCK; EFFICIENCY; CUTTERS; MODEL	Underground research laboratory (URL) plays an important role in safe disposal of high-level radioactive waste (HLW). At present, the Xinchang site, located in Gansu Province of China, has been selected as the final site for China's first URL, named Beishan URL. For this, a preliminary design of the Beishan URL has been proposed, including one spiral ramp, three shafts and two experimental levels…	[Ma, Hongsu; Wang, Ju; Chen, Liang; Zhao, Xingguang] Beijing Res Inst Uranium Geol, CNNC Key Lab Geol Disposal High Level Radioact Wa, Beijing, Peoples R China; [Man, Ke] North China Univ Technol, Beijing, Peoples R China; [Gong, Qiuming] Beijing Univ Technol, Key Lab Urban Secur & Disaster Engn, Minist Educ, Beijing, Peoples R China	Wang, J (corresponding author), Beijing Res Inst Uranium Geol, CNNC Key Lab Geol Disposal High Level Radioact Wa, Beijing, Peoples R China.	wangju9818@163.com	gong, qiuming/G-2052-2011	MA, Hongsu/0000-0001-5305-4326	China Atomic Energy Authority	China Atomic Energy Authority is thanked for its financial support for this project. The authors would like to acknowledge China Railway Engineering Equipment Group Co., Ltd., China Railway Construction Heavy Industry Co., Ltd., Herrenknecht AG, China Railway 18th Bureau Group Co., Ltd., China Railway Tunnel Group Co., Ltd., and Liaoning Censcience Industry Co., Ltd. for their technical support o…	Backblom G, 2004, R0462 SKB; Balci C, 2009, TUNN UNDERGR SP TECH, V24, P423, DOI 10.1016/j.tust.2008.12.001; Barla G., 2000, GEOENG2000; Barton N., 2000, TBM TUNNELLING JOINT; Bieniawski ZT, 2008, ITAEAITES WORLD TUNN; Bruland A., 1998, THESIS; Bruland A, 1998, NORWEGIAN TBM TUNNEL; Chang S.H., 2006, TUNNELL UNDERGROUND, V21, P271, DOI DOI 10.1016/J.TUST.2005.12.131; Cho JW, 2013, TUNN UNDERGR SP…	46	0	0	2	2	SCIENCE PRESS	BEIJING	16 DONGHUANGCHENGGEN NORTH ST, BEIJING 100717, PEOPLES R CHINA	1674-7755	2589-0417		J ROCK MECH GEOTECH	J. Rock Mech. Geotech. Eng.	DEC	2020	12	6
J	Tiwari, B; Ye, GL; Li, MG; Khalid, U; Yadav, SK				Tiwari, Bandana; Ye, Guanlin; Li, Mingguang; Khalid, Usama; Yadav, Santosh Kumar			Strength and dilatancy behaviors of deep sands in Shanghai with a focus on grain size and shape effect	JOURNAL OF ROCK MECHANICS AND GEOTECHNICAL ENGINEERING			English	Article						Deep sands in Shanghai; Laboratory tests; Shear strength; Dilatancy; Relative density	CRITICAL-STATE; MECHANICAL-BEHAVIOR; GRANULAR-MATERIALS; SHEAR-STRENGTH; PARTICLE-SHAPE; STEADY-STATE; MARINE CLAY; ANGULARITY; DEFORMATION; EXCAVATION	With rapid development of infrastructures like tunnels and open excavations in Shanghai, investigations on deeper soils have become critically important. Most of the existing laboratory works were focused on the clayey strata up to Layer 6 in Shanghai, i.e. at depth of up to 40 m. In this paper, Layers 7, 9, and 11, which were mostly formed of sandy soils at depth of up to 150 m, were experimenta…	[Tiwari, Bandana; Ye, Guanlin; Li, Mingguang; Khalid, Usama; Yadav, Santosh Kumar] Shanghai Jiao Tong Univ, Dept Civil Engn, Shanghai 200240, Peoples R China; [Tiwari, Bandana; Ye, Guanlin; Li, Mingguang; Khalid, Usama; Yadav, Santosh Kumar] Shanghai Jiao Tong Univ, State Key Lab Ocean Engn, Shanghai 200240, Peoples R China; [Yadav, Santosh Kumar] Tribhuvan Univ, Dept Civil Engn, IOE, Pulchowk Ca…	Ye, GL (corresponding author), Shanghai Jiao Tong Univ, Dept Civil Engn, Shanghai 200240, Peoples R China.; Ye, GL (corresponding author), Shanghai Jiao Tong Univ, State Key Lab Ocean Engn, Shanghai 200240, Peoples R China.	ygl@sjtu.edu.cn			National Natural Science Foundation of ChinaNational Natural Science Foundation of China (NSFC) [42072317, 41727802]	The financial support of the National Natural Science Foundation of China (Grant Nos. 42072317 and 41727802) is gratefully acknowledged.	[Anonymous], D4767922002 ASTM; [Anonymous], A12242009 JIS, P136; [Anonymous], JGS05232000, P54; BEEN K, 1991, GEOTECHNIQUE, V41, P365, DOI 10.1680/geot.1991.41.3.365; BOLTON MD, 1986, GEOTECHNIQUE, V36, P65, DOI 10.1680/geot.1986.36.1.65; Cabalar AF, 2013, ENG GEOL, V156, P92, DOI 10.1016/j.enggeo.2013.01.011; Chattopadhya BC, 1981, INT J GEOMECH, V81, P291; Chen JJ, 2014, ACTA GEOTECH, V9, P981,…	60	0	0	2	2	SCIENCE PRESS	BEIJING	16 DONGHUANGCHENGGEN NORTH ST, BEIJING 100717, PEOPLES R CHINA	1674-7755	2589-0417		J ROCK MECH GEOTECH	J. Rock Mech. Geotech. Eng.	DEC	2020	12	6
J	Xing, YK; Huang, BX; Ning, EQ; Zhao, L; Jin, F				Xing, Yuekun; Huang, Bingxiang; Ning, Erqiang; Zhao, Long; Jin, Feng			Quasi-static loading rate effects on fracture process zone development of mixed-mode (I-II) fractures in rock-like materials	ENGINEERING FRACTURE MECHANICS			English	Article						Quasi-static loading rates; Mixed-mode (I-II) fracture; Fracture process zone; Rock-like materials; DIC method; CCBD specimen	POLYCRYSTALLINE CERAMICS; LIMESTONE ROCK; TOUGHNESS; STRESS; PROPAGATION; INITIATION; BEHAVIORS; SPECIMENS; GEOMETRY	The development of a fracture process zone (FPZ) (microcrack zone) ahead of a fracture tip is a prominent fracture characteristic of rock-like materials. At present, understanding of the quasi static loading-rate effect on the FPZ development of a mixed-mode (I-II) fracture remains challenging for rock-like materials. In this paper, the centrally cracked Brazilian disk (CCBD) specimens of artific…	[Xing, Yuekun; Huang, Bingxiang; Ning, Erqiang; Zhao, Long; Jin, Feng] China Univ Min & Technol, Sture Key Lab Cool Resources & Safe Min, Xuzhou 221116, Jiangsu, Peoples R China	Huang, BX (corresponding author), China Univ Min & Technol, Sture Key Lab Cool Resources & Safe Min, Xuzhou 221116, Jiangsu, Peoples R China.	huangbingxiang@cumt.edu.cn			Fundamental Research Funds for the Central UniversitiesFundamental Research Funds for the Central Universities [2020QN45]; National Natural Science Foundation of ChinaNational Natural Science Foundation of China (NSFC) [52004265]	This work was financially supported by the Fundamental Research Funds for the Central Universities (2020QN45) and the National Natural Science Foundation of China (No. 52004265).	Akbardoost J, 2014, INT J ROCK MECH MIN, V71, P369, DOI 10.1016/j.ijrmms.2014.07.019; Aliha MRM, 2006, APPL MECH MATER, V5-6, P181, DOI 10.4028/www.scientific.net/AMM.5-6.181; Aliha MRM, 2012, INT J SOLIDS STRUCT, V49, P1877, DOI 10.1016/j.ijsolstr.2012.03.029; Aliha MRM, 2011, APPL MECH MATER, V70, P159, DOI 10.4028/www.scientific.net/AMM.70.159; Aliha MRM, 2012, ROCK MECH ROCK ENG, V45, P65, DO…	58	1	1	12	12	PERGAMON-ELSEVIER SCIENCE LTD	OXFORD	THE BOULEVARD, LANGFORD LANE, KIDLINGTON, OXFORD OX5 1GB, ENGLAND	0013-7944	1873-7315		ENG FRACT MECH	Eng. Fract. Mech.	DEC	2020	240
J	Fang, K; Tang, HM; Su, XX; Shang, WT; Jia, SL				Fang, Kun; Tang, Huiming; Su, Xuexue; Shang, Wentao; Jia, Shenglong			Geometry and Maximum Width of a Stable Slope Considering the Arching Effect	JOURNAL OF EARTH SCIENCE			English	Article						slope failure; geological engineering; cracked soil slope; large-scale model test; deformation mechanism; arching slope	LANDSLIDE; EARTHQUAKE; STABILITY	The stability of an arching slope in deformable materials above strong rocks strongly depends on the shape and width of the span. Equations for a free surface problem that incorporate these two parameters were derived using a simplified two-dimensional arching slope model, and were validated using physical model tests under 1g and centrifugal conditions. The results are used to estimate the maxim…	[Fang, Kun; Tang, Huiming; Su, Xuexue] China Univ Geosci, Fac Engn, Wuhan 430074, Peoples R China; [Shang, Wentao] Shandong Jianzhu Univ, Sch Civil Engn, Jinan 250101, Peoples R China; [Jia, Shenglong] Univ Alberta, Fac Engn, Edmonton, AB T6G2R3, Canada	Tang, HM (corresponding author), China Univ Geosci, Fac Engn, Wuhan 430074, Peoples R China.	zjmnm@163.com					Beddoe RA, 2015, ENG GEOL, V187, P170, DOI 10.1016/j.enggeo.2015.01.006; BOSSCHER PJ, 1986, J GEOTECH ENG-ASCE, V112, P626, DOI 10.1061/(ASCE)0733-9410(1986)112:6(626); Chen CY, 2002, COMPUT GEOTECH, V29, P363, DOI 10.1016/S0266-352X(01)00035-0; Coulomb C A, 1781, RECUEIL SAVANTS ETRA, V10, P161; Coulomb C. A, 1776, MEMOIRES ACAD ROYALE, V7, P343; Das B. M., 2016, FUNDAMENTALS GEOTECH; Davis RO, …	38	0	0	11	11	CHINA UNIV GEOSCIENCES, WUHAN	WUHAN	388 LIMO RD, WUHAN, CHINA MAINLAND 430074, PEOPLES R CHINA	1674-487X	1867-111X		J EARTH SCI-CHINA	J. Earth Sci.	DEC	2020	31	6			SI
J	Li, C; Guo, XF; Lian, XY; Ma, NJ				Li, Chen; Guo, Xiaofei; Lian, Xiaoyong; Ma, Nianjie			Failure Analysis of a Pre-Excavation Double Equipment Withdrawal Channel and Its Control Techniques	ENERGIES			English	Article						equipment withdrawal channel; stress distribution; plastic zone; surrounding rock control	PLASTIC ZONE; ROOF STRATA; STABILITY; MECHANISM; ROADWAY; STRESS; TUNNELS; SYSTEM	The use of pre-excavation equipment withdrawal channels (EWCs) at the stop-production line is important for the rapid withdrawal of coal mining equipment. However, during the final mining period, the dynamic pressure of a pre-excavated double EWC is severe, which leads to instability of the surrounding rock around the EWCs. Therefore, in this paper, the methods of field monitoring, theoretical an…	[Li, Chen; Guo, Xiaofei; Lian, Xiaoyong; Ma, Nianjie] China Univ Min & Technol Beijing, Sch Energy & Min Engn, Beijing 100083, Peoples R China	Guo, XF (corresponding author), China Univ Min & Technol Beijing, Sch Energy & Min Engn, Beijing 100083, Peoples R China.	bqt1800101008@student.cumtb.edu.cn; b201901@student.cumtb.edu.cn; bqt2000101013@student.cumtb.edu.cn; 108031@cumtb.edu.cn		Li, Chen/0000-0003-1098-7729	National Natural Science Foundation of ChinaNational Natural Science Foundation of China (NSFC) [52004289]; National Key Research and Development Program [2016YFC0600708]	This work was partially supported by the National Natural Science Foundation of China (Grant No. 52004289) and the National Key Research and Development Program (Grant No. 2016YFC0600708).	Bai QS, 2017, INT J COAL GEOL, V173, P176, DOI 10.1016/j.coal.2017.02.015; Chen H., 2018, J MIN SCI TECHNOL, V3, P543, DOI [10.19606/j.cnki.jmst.2018.06.005, DOI 10.19606/J.CNKI.JMST.2018.06.005]; Cohen T, 2009, INT J SOLIDS STRUCT, V46, P3643, DOI 10.1016/j.ijsolstr.2009.06.013; Diederichs MS, 1999, INT J ROCK MECH MIN, V36, P97, DOI 10.1016/S0148-9062(98)00180-6; Gao XC, 2019, GEOTECH GEOL ENG,…	43	0	0	2	2	MDPI	BASEL	ST ALBAN-ANLAGE 66, CH-4052 BASEL, SWITZERLAND		1996-1073		ENERGIES	Energies	DEC	2020	13	23
J	Shao, H; Wang, YF; Nagel, T; Kolditz, O; Yoshioka, K				Shao, Hua; Wang, Yifeng; Nagel, Thomas; Kolditz, Olaf; Yoshioka, Keita			Determination of permeability for hydrocarbon release due to excavation-induced stress redistribution in rock salt	INTERNATIONAL JOURNAL OF ROCK MECHANICS AND MINING SCIENCES			English	Article						Fluid inclusion; Rock salt; Micro-scale pathway dilation; Multi-scale modelling; OpenGeoSys; DECOVALEX 2019	BRINE INCLUSIONS; LIQUID DROPLETS; MIGRATION; DEFORMATION; POLYCRYSTALS	Due to a stress redistribution after the excavation of an underground tunnel for radioactive waste disposal, an Ed/DZ (excavation disturbed/damaged zone) will be generated in the near field of the opening, resulting in significant changes in the hydraulic and mechanical properties of the rock mass in the zone. Initially more or less randomly distributed hydrocarbons at grain boundaries in rock sa…	[Shao, Hua] Fed Inst Geosci & Nat Resources BGR, Hannover, Germany; [Wang, Yifeng] Sandia Natl Labs SNL, Albuquerque, NM USA; [Nagel, Thomas; Kolditz, Olaf; Yoshioka, Keita] UFZ Helmholtz Ctr Environm Res, Leipzig, Germany; [Nagel, Thomas] Tech Univ Bergakad Freiberg TUBAF, Freiberg, Germany; [Kolditz, Olaf] Tech Univ Dresden TUD, Dresden, Germany	Shao, H (corresponding author), Fed Inst Geosci & Nat Resources BGR, Hannover, Germany.	shao@bgr.de	Nagel, Thomas/T-8805-2019	Nagel, Thomas/0000-0001-8459-4616	DECOVALEX Funding Organisations Andra; BGR/UFZ; CNSC; US DOEUnited States Department of Energy (DOE); ENSI; JAEAJapan Atomic Energy Agency; IRSN; KAERI; NWMO; RWM; SURAO; SSMMinistry of National Defence, Turkey; Taipower; BMWi (Bundesministerium fur Wirtschaft und Technologie, Berlin); iCROSS-Project (Integrity of nuclear waste repository systems - Crossscale system understanding and analysis) by…	DECOVALEX is an international research project comprising participants from industry, government and academia, focusing on the development of understanding, models and codes in complex coupled problems in sub-surface geological and engineering applications. DECOVALEX 2019 is the current phase of the project. The authors appreciate and thank the DECOVALEX 2019 Funding Organisations Andra, BGR/UFZ,…	ANTHONY TR, 1971, J APPL PHYS, V42, P3380, DOI 10.1063/1.1660741; ANTHONY TR, 1972, ACTA METALL MATER, V20, P247, DOI 10.1016/0001-6160(72)90187-3; Bechthold W, 2004, EUR20621EN; Birkholzer JT, 2019, INT J ROCK MECH MIN, V122, DOI 10.1016/j.ijrmms.2019.03.015; Bottcher N, 2017, ENVIRON EARTH SCI, V76, DOI 10.1007/s12665-017-6414-2; Bourdin B, 2012, 146951 ATCE SPE; BRADSHAW RL, 1969, J GEOPHYS RE…	39	0	0	3	3	PERGAMON-ELSEVIER SCIENCE LTD	OXFORD	THE BOULEVARD, LANGFORD LANE, KIDLINGTON, OXFORD OX5 1GB, ENGLAND	1365-1609	1873-4545		INT J ROCK MECH MIN	Int. J. Rock Mech. Min. Sci.	DEC	2020	136
J	Patel, S; Martin, CD				Patel, Shantanu; Martin, C. Derek			Effect of Stress Path on the Failure Envelope of Intact Crystalline Rock at Low Confining Stress	MINERALS			English	Article						stress path; confined extension test; flat-jointed bonded particle model; intermediate principal stress	BONDED-PARTICLE MODEL; SUGGESTED METHODS; FRACTURE; STRENGTH; DAMAGE; PROPAGATION; INITIATION; MECHANICS	Numerical modelling is playing an increasing role in the interpretation of geological observations. A similar phenomenon is occurring with respect to the interpretation of the stress-strain response of intact rock measured in laboratory tests. In this research, the three-dimensional (3D) bonded particle model (BPM) with flat-jointed (FJ) contact was used to investigate the impact of stress paths …	[Patel, Shantanu] Indian Inst Technol Kharagpur, Dept Min Engn, Kharagpur 721302, W Bengal, India; [Martin, C. Derek] Univ Alberta, Dept Civil & Environm Engn, Edmonton, AB T6G 2R3, Canada	Patel, S (corresponding author), Indian Inst Technol Kharagpur, Dept Min Engn, Kharagpur 721302, W Bengal, India.	shantanu.patel@mining.iitkgp.ac.in; derek.martin@ualberta.ca		Patel, Shantanu/0000-0002-8617-2043	Swedish Nuclear Fuel and Waste Management Co. (SKB) Sweden; Canadian Nuclear Waste Management Organization (NWMO); Natural Sciences and Engineering Research Council of CanadaNatural Sciences and Engineering Research Council of Canada (NSERC)CGIAR	This research was funded by the Swedish Nuclear Fuel and Waste Management Co. (SKB) Sweden, the Canadian Nuclear Waste Management Organization (NWMO), and the Natural Sciences and Engineering Research Council of Canada.	Andersson JC, 2009, INT J ROCK MECH MIN, V46, P879, DOI 10.1016/j.ijrmms.2009.03.002; Bahrani N, 2015, INT J ROCK MECH MIN, V80, P40, DOI 10.1016/j.ijrmms.2015.09.002; BIENIAWSKI ZT, 1979, INT J ROCK MECH MIN, V16, P137, DOI 10.1016/0148-9062(79)91450-5; BIENIAWSKI ZT, 1978, INT J ROCK MECH MIN, V15, P99; Bieniawski ZT., 1967, INT J ROCK MECH MIN, V4, P407, DOI [DOI 10.1016/0148-9062(67)90031-9, …	35	1	1	0	0	MDPI	BASEL	ST ALBAN-ANLAGE 66, CH-4052 BASEL, SWITZERLAND		2075-163X		MINERALS-BASEL	Minerals	DEC	2020	10	12
J	Han, KH; Wang, XT; Hou, BB; Lin, XT; Cao, CY				Han, Kaihang; Wang, Xuetao; Hou, Beibei; Lin, Xingtao; Cao, Chengyong			Analysis of Instability Mode and Limit Support Pressure of Shallow Tunnel Face in Sands	SYMMETRY-BASEL			English	Article						shallow tunnel; symmetrical model test; shear failure band; pressure arch; limit support pressure	STABILITY; SEEPAGE	The stability analysis of the tunnel face is not only essential for guaranteeing the safe construction of urban shallow tunnels, but also directly affecting the influence degree of tunnel construction on nearby structures. The primary concerns in the stability analysis of the tunnel face are the instability mode of surrounding rocks and the limit support pressure on the tunnel face. In this paper…	[Han, Kaihang; Wang, Xuetao; Lin, Xingtao; Cao, Chengyong] Shenzhen Univ, Coll Civil & Transportat Engn, Shenzhen 518060, Peoples R China; [Han, Kaihang; Wang, Xuetao; Lin, Xingtao; Cao, Chengyong] Shenzhen Univ, Underground Polis Acad, Shenzhen 518060, Peoples R China; [Hou, Beibei] China Jingye Engn Co Ltd, Beijing 100088, Peoples R China	Wang, XT (corresponding author), Shenzhen Univ, Coll Civil & Transportat Engn, Shenzhen 518060, Peoples R China.; Wang, XT (corresponding author), Shenzhen Univ, Underground Polis Acad, Shenzhen 518060, Peoples R China.	hankaihang@szu.edu.cn; xuetao.wang@szu.edu.cn; houbeibei0311@hotmail.com; xtlin@szu.edu.cn; cy-cao@szu.edu.cn		Han, Kaihang/0000-0002-5623-6376	National Natural Science Foundation of ChinaNational Natural Science Foundation of China (NSFC) [51908371]	This research was funded by the National Natural Science Foundation of China (No. 51908371).	ATKINSON JH, 1977, GEOTECHNIQUE, V27, P203, DOI 10.1680/geot.1977.27.2.203; Bezuijen A., 1997, 22 BOR TUNN LEID DEL; CHAMBON P, 1994, J GEOTECH ENG-ASCE, V120, P1148, DOI 10.1061/(ASCE)0733-9410(1994)120:7(1148); Chen RP, 2018, TUNN UNDERGR SP TECH, V81, P315, DOI 10.1016/j.tust.2018.06.031; Hisatake M, 1995, INTERNATIONAL CONGRESS ON ROCK MECHANICS - PROCEEDINGS, VOLS 1 AND 2, P587; Idinger G, 2…	13	0	0	4	4	MDPI	BASEL	ST ALBAN-ANLAGE 66, CH-4052 BASEL, SWITZERLAND		2073-8994		SYMMETRY-BASEL	Symmetry-Basel	DEC	2020	12	12
J	Song, Y; Huang, ML; Zhang, XD; Li, ZP; Peng, XX				Song, Yuan; Huang, Mingli; Zhang, Xudong; Li, Zhaoping; Peng, Xingxin			Experimental and Numerical Investigation on Bearing Capacity of Circumferential Joint of New Spatial Steel Tubular Grid Arch in Mined Tunnel	SYMMETRY-BASEL			English	Article						spatial steel tubular grid (SSTG) arches; circumferential joint; mechanical behavior; bearing capacity; failure mode; numerical simulation	LATTICE GIRDER; PERFORMANCE; SIMULATION	Under the circumstance of soft fractured surrounding rock with high geo-stress, the support technology of tunnel has become a major challenge. Traditional I-shaped steel and bar lattice girder, which cross-sections are often designed to be left-right symmetrical, may have insufficient strength and stiffness. Based on the concept of symmetry, a new support technology of spatial steel tubular grid …	[Song, Yuan; Huang, Mingli; Li, Zhaoping] Beijing Jiaotong Univ, Key Lab Urban Underground Engn, Minist Educ, Beijing 100044, Peoples R China; [Song, Yuan; Huang, Mingli; Li, Zhaoping] Beijing Jiaotong Univ, Sch Civil Engn, Beijing 100044, Peoples R China; [Zhang, Xudong] China Railway 11th Bur Grp Co Ltd, Wuhan 430000, Peoples R China; [Peng, Xingxin] China Railway 11th Bur Grp 4th Engn Co Ltd, …	Huang, ML (corresponding author), Beijing Jiaotong Univ, Key Lab Urban Underground Engn, Minist Educ, Beijing 100044, Peoples R China.; Huang, ML (corresponding author), Beijing Jiaotong Univ, Sch Civil Engn, Beijing 100044, Peoples R China.	18115036@bjtu.edu.cn; mlhuang@bjtu.edu.cn; 19121103@bjtu.edu.cn; zhpli@bjtu.edu.cn; 19125902@bjtu.edu.cn			National Key R&D Program of China [2018YFC0808705]	This research was funded by the National Key R&D Program of China (2018YFC0808705).	BAUMANN T, 1984, ROCK MECH ROCK ENG, V17, P67, DOI 10.1007/BF01042710; China Machinery Industry, 2006, 12312006 GBT CHIN MA; China Machinery Industry, 2017, 500172017 GB CHIN MA; [杜贝举 Du Beiju], 2020, [采矿与安全工程学报, Journal of Mining & Safety Engineering], V37, P1123; Fan Jianting, 2014, Zhejiang Nonglin Daxue Xuebao, V31, P78; [方星桦 Fang Xinghua], 2020, [中国铁道科学, China Railway Science], V41, P92; Jin…	27	0	0	1	1	MDPI	BASEL	ST ALBAN-ANLAGE 66, CH-4052 BASEL, SWITZERLAND		2073-8994		SYMMETRY-BASEL	Symmetry-Basel	DEC	2020	12	12
J	Qiu, HZ; Chen, XQ; Wu, QH; Wang, RC; Zhao, WY; Qian, KJ				Qiu Hong-zhi; Chen Xiao-qing; Wu Qi-hong; Wang Ren-chao; Zhao Wan-yu; Qian Ke-jiang			Deformation mechanism and collapse treatment of the rock surrounding a shallow tunnel based on on-site monitoring	JOURNAL OF MOUNTAIN SCIENCE			English	Article						Shallow tunnel; Surrounding rock deformation; Field monitoring; Treatment for collapse; Information feedback	FAILURE; TIME; SOIL	When tunnels are constructed at shallow depths in areas with poor geological conditions, such as portal sections, valleys and hillsides in regions with granitic bedrock, considerable excavation-induced deformation of the surrounding rock may occur, potentially resulting in tunnel collapses. The main reason for these problems is the lack of understanding of the deformation mechanism and evolution …	[Qiu Hong-zhi; Wu Qi-hong; Qian Ke-jiang] Chengdu Univ, Sch Architecture & Civil Engn, Chengdu 610106, Peoples R China; [Qiu Hong-zhi; Chen Xiao-qing; Zhao Wan-yu] Chinese Acad Sci, Inst Mt Hazards & Environm, Key Lab Mt Hazards & Earth Surface Proc, Chengdu 610041, Peoples R China; [Qiu Hong-zhi] Changsha Univ Sci Technol, Hunan Int Sci & Technol Innovat Cooperat Base Adv, Changsha 410114, Peopl…	Wu, QH (corresponding author), Chengdu Univ, Sch Architecture & Civil Engn, Chengdu 610106, Peoples R China.; Chen, XQ (corresponding author), Chinese Acad Sci, Inst Mt Hazards & Environm, Key Lab Mt Hazards & Earth Surface Proc, Chengdu 610041, Peoples R China.	hongzhi@imde.ac.cn; xqchen@imde.ac.cn; wqh1016@cdu.edu.cn; renchao1225@sina.com; wyzhao@imde.ac.cn; qiankejiang@stu.cdu.edu.cn		chen, xiao qing/0000-0002-0177-0811; Qian, Kejiang/0000-0003-3523-1709			Abdellah Wael R., 2018, Journal of Sustainable Mining, V17, P20, DOI 10.1016/j.jsm.2018.02.001; Cao CY, 2018, KSCE J CIV ENG, V22, P3170, DOI 10.1007/s12205-017-1586-6; Casse C, 2019, SAFETY SCI, V116, P222, DOI 10.1016/j.ssci.2019.03.015; Chakeri H, 2011, B ENG GEOL ENVIRON, V70, P439, DOI 10.1007/s10064-010-0333-8; China First Highway Engineering Company, 2009, JTGF602009; China State Railway G…	56	0	0	8	8	SCIENCE PRESS	BEIJING	16 DONGHUANGCHENGGEN NORTH ST, BEIJING 100717, PEOPLES R CHINA	1672-6316	1993-0321		J MT SCI-ENGL	J Mt. Sci.	DEC	2020	17	12
J	Ren, SL; Tao, ZG; He, MC; Pang, SH; Li, MN; Xu, HT				Ren Shu-lin; Tao Zhi-gang; He Man-chao; Pang Shi-hui; Li Meng-nan; Xu Hao-tian			Stability analysis of open-pit gold mine slopes and optimization of mining scheme in Inner Mongolia, China	JOURNAL OF MOUNTAIN SCIENCE			English	Article						Open pit mine; Slope stability; Numerical simulation; Excavation scheme	FAILURE-MECHANISM; BEDDING ROCKSLIDE; ROCK SLOPE; LANDSLIDE; RESERVOIR; AREA	The geological structure of the Changshanhao open-pit mine in Urad Middle Banner, Inner Mongolia, China is extremely complicated, and slope instability has frequently occurred in various forms, such as wedge sliding, bedding sliding, and toppling failure. In order to study the failure mechanisms of these slopes, the geological structure and mechanical rock properties were investigated based on fi…	[Ren Shu-lin; Tao Zhi-gang; He Man-chao; Pang Shi-hui; Li Meng-nan; Xu Hao-tian] State Key Lab Geomech & Deep Underground Engn, Beijing 100083, Peoples R China; [Ren Shu-lin; Tao Zhi-gang; He Man-chao; Pang Shi-hui; Li Meng-nan; Xu Hao-tian] China Univ Min & Technol, Sch Mech & Civil Engn, Beijing 100083, Peoples R China	Tao, ZG (corresponding author), State Key Lab Geomech & Deep Underground Engn, Beijing 100083, Peoples R China.; Tao, ZG (corresponding author), China Univ Min & Technol, Sch Mech & Civil Engn, Beijing 100083, Peoples R China.	rsl1995@126.com; taozhigang@cumtb.edu.cn; 805309740@qq.com; pshpower@163.com; lmn493622439@163.com; xuhaotian2019@163.com		Xu, Haotian/0000-0003-1012-4632			Bishop W., 1955, GEOTECHNIQUE, V5, P7, DOI [10.1680/geot.1955.5.1.7, DOI 10.1680/GEOT.1955.5.1.7]; Cevasco A, 2014, B ENG GEOL ENVIRON, V73, P859, DOI 10.1007/s10064-013-0544-x; Coe JA, 2018, LANDSLIDES, V15, P393, DOI 10.1007/s10346-017-0879-7; Dhahri F, 2016, B ENG GEOL ENVIRON, V75, P1459, DOI 10.1007/s10064-015-0827-5; Loi DH, 2017, LANDSLIDES, V14, P1207, DOI 10.1007/s10346-017-0814-y; Froud…	35	0	0	24	24	SCIENCE PRESS	BEIJING	16 DONGHUANGCHENGGEN NORTH ST, BEIJING 100717, PEOPLES R CHINA	1672-6316	1993-0321		J MT SCI-ENGL	J Mt. Sci.	DEC	2020	17	12
J	Cheng, JL; Jiang, ZH; Han, WF; Li, ML; Wang, YX				Cheng, Jian-Long; Jiang, Zi-Hao; Han, Wei-Feng; Li, Ming-Li; Wang, Yong-Xing			Breakage mechanism of hard-rock penetration by TBM disc cutter after high pressure water jet precutting	ENGINEERING FRACTURE MECHANICS			English	Article						TBM disc cutter; Pre-cutting by high-pressure water jet; Penetration test; Rock breakage; 3DEC numerical simulation	INDENTATION TESTS; CONFINING STRESS; NUMERICAL-SIMULATION; FRAGMENTATION; PERFORMANCE; EXCAVATION; PREDICTION; SUBJECT; ENERGY; WEAR	To achieve greater efficiency of TBM driving and lower cutter maintenance costs in hard rock formations, the TBM integrated high pressure water jet system was developed. By examining the working modes of water jets and disc cutters, this paper investigates the mechanical response and failure mechanisms for the simple case in which a water jet is first used to cut, followed by disc cutter rock bre…	[Cheng, Jian-Long; Jiang, Zi-Hao; Li, Ming-Li; Wang, Yong-Xing] Chengdu Univ Technol, State Key Lab Geohazard Prevent & Geoenvironm, Chengdu 610059, Sichuan, Peoples R China; [Han, Wei-Feng] State Key Lab Shield Machine & Boring Technol, Zhengzhou 450001, Peoples R China	Cheng, JL (corresponding author), Chengdu Univ Technol, State Key Lab Geohazard Prevent & Geoenvironm, Chengdu 610059, Sichuan, Peoples R China.	chengjl2018@foxmail.com			Teacher Development Research Foundation in Chengdu University of Technology of China [10912-2019KYQD07278]; Youth Program of National Natural Science Foundation of China [42007277]	This work was financially supported by the Teacher Development Research Foundation in Chengdu University of Technology of China (Grant No. 10912-2019KYQD07278) and Youth Program of National Natural Science Foundation of China (Grant No. 42007277).	Bejari H, 2013, ROCK MECH ROCK ENG, V46, P897, DOI 10.1007/s00603-012-0314-2; Carpinteri A, 2004, ENG FRACT MECH, V71, P567, DOI 10.1016/S0013-7944(03)00037-7; Chen LH, 2006, INT J ROCK MECH MIN, V43, P1023, DOI 10.1016/j.ijrmms.2006.03.005; Ciccu R, 2014, ROCK MECH ROCK ENG, V47, P733, DOI 10.1007/s00603-013-0433-4; Ciccu R, 2010, ROCK MECH ROCK ENG, V43, P465, DOI 10.1007/s00603-009-0068-7; Far…	28	1	1	27	27	PERGAMON-ELSEVIER SCIENCE LTD	OXFORD	THE BOULEVARD, LANGFORD LANE, KIDLINGTON, OXFORD OX5 1GB, ENGLAND	0013-7944	1873-7315		ENG FRACT MECH	Eng. Fract. Mech.	DEC	2020	240
J	Niu, L; Hong, T; Xu, XW; Li, H; Ke, Q; Wang, XH; Ma, YC				Niu, Lei; Hong, Tao; Xu, Xing-Wang; Li, Hang; Ke, Qiang; Wang, Xue-Hai; Ma, Yin-Ce			A revised stratigraphic and tectonic framework for the Ashele volcanogenic massive sulfide deposit in the southern Chinese Altay: Evidence from stratigraphic relationships and zircon geochronology	ORE GEOLOGY REVIEWS			English	Article						Stratigraphic and tectonic framework; Zircon geochronology; VMS deposit; Ashele district; Southern Chinese Altay	DEVONIAN VOLCANIC-ROCKS; CU-ZN DEPOSIT; U-PB AGES; OROGENIC BELT; NW CHINA; STRUCTURAL RECONSTRUCTION; FLUID INCLUSION; VMS DEPOSIT; ICP-MS; XINJIANG	The Ashele volcanogenic massive sulfide (VMS) deposit is the largest and most representative VMS deposit in the Chinese Altay Metallogenic Belt, but its stratigraphic sequence, tectonic framework, and morphology are debated. In this paper, on the basis of previous research, field investigations, excavation pits, drill-core sampling, and new LA-ICP-MS U-Pb analyses of zircons from mafic and felsic…	[Niu, Lei; Xu, Xing-Wang; Li, Hang; Ke, Qiang; Wang, Xue-Hai; Ma, Yin-Ce] Chinese Acad Sci, Inst Geol & Geophys, Key Lab Mineral Resources, Beijing 100029, Peoples R China; [Niu, Lei; Xu, Xing-Wang; Li, Hang; Ke, Qiang; Wang, Xue-Hai; Ma, Yin-Ce] Chinese Acad Sci, Innovat Acad Earth Sci, Beijing 100029, Peoples R China; [Niu, Lei; Xu, Xing-Wang; Li, Hang; Ke, Qiang; Wang, Xue-Hai; Ma, Yin-Ce] Uni…	Hong, T (corresponding author), Sun Yat Sen Univ, Sch Earth Sci & Geol Engn, Guangzhou 510472, Peoples R China.	hongtao12@mail.iggcas.ac.cn			National Key R&D Program of China [2017YFC0601201, 2018YFC0604002]; International Partnership Program of International Cooperation Bureau, Chinese Academy of Sciences [132A11KYSB20190070]; National Natural Science Foundation of ChinaNational Natural Science Foundation of China (NSFC) [41802093]; China Postdoctoral Science FoundationChina Postdoctoral Science Foundation [2018M630201]; 2018 Sino-Ge…	This research was jointly supported by the National Key R&D Program of China (Grant Numbers 2017YFC0601201 and 2018YFC0604002), International Partnership Program of International Cooperation Bureau, Chinese Academy of Sciences (132A11KYSB20190070), National Natural Science Foundation of China (41802093) and the China Postdoctoral Science Foundation (2018M630201), as well as the 2018 Sino-German (…	Allen RL, 2011, MINER DEPOSITA, V46, P429, DOI 10.1007/s00126-011-0368-1; Barrie C.T., 1999, SOC EC GEOL, P1; Barrie CT, 2007, ECON GEOL, V102, P717, DOI 10.2113/gsecongeo.102.4.717; Brueckner SM, 2015, MINER DEPOSITA, V50, P619, DOI 10.1007/s00126-014-0567-7; Cai KD, 2011, LITHOS, V127, P261, DOI 10.1016/j.lithos.2011.09.001; Cai KD, 2010, GONDWANA RES, V18, P638, DOI 10.1016/j.gr.2010.02.010; C…	62	1	1	5	5	ELSEVIER	AMSTERDAM	RADARWEG 29, 1043 NX AMSTERDAM, NETHERLANDS	0169-1368	1872-7360		ORE GEOL REV	Ore Geol. Rev.	DEC	2020	127
J	Gui, Y; Zhao, ZX; Qin, XQ; Wang, JF				Gui, Yue; Zhao, Zhenxing; Qin, Xiaqiang; Wang, Jianfei			Study on Deformation Law of Deep Foundation Pit with the Top-Down Method and Its Influence on Adjacent Subway Tunnel	ADVANCES IN CIVIL ENGINEERING			English	Article							GROUND SURFACE SETTLEMENT; EXCAVATION; CONSTRUCTION	Based on a long-term comprehensive instrumentation program, the performance of an excavation pit constructed by the top-down method in downtown Kunming was extensively examined. The measured excavation responses included the deflections of diaphragm wall, vertical column movement, slab axial force, building settlement caused by ground deformation, and the influence of pit excavation on the adjace…	[Gui, Yue; Zhao, Zhenxing] Kunming Univ Sci & Technol, Dept Civil Engn, Kunming 650504, Yunnan, Peoples R China; [Qin, Xiaqiang] China Mcc20 Grp Corp Ltd, Shanghai 201900, Peoples R China; [Wang, Jianfei] Yunnan Construct & Investment Holding Grp CO Ltd, Kunming 650504, Yunnan, Peoples R China	Gui, Y (corresponding author), Kunming Univ Sci & Technol, Dept Civil Engn, Kunming 650504, Yunnan, Peoples R China.	gydrgui@kmust.edu.cn		gui, yue/0000-0003-4067-0001	National Natural Science Foundation of ChinaNational Natural Science Foundation of China (NSFC) [51568030, 51768027, 52068039]; Yunnan Basic Research Key Project [2018BC013]	This article was supported by the National Natural Science Foundation of China (nos. 51568030, 51768027, and 52068039) and the Yunnan Basic Research Key Project (no. 2018BC013).	Ai H. T., 2005, CHINESE J ROCK MECH, V2, P5485; Bjerrum L, 1963, 2 EUR C SOIL MED FDN, V2, P135; Cai J. P., 2015, CHINA FOREIGN HIGHWA, V35, P23; Chang CT, 2001, TUNN UNDERGR SP TECH, V16, P151, DOI 10.1016/S0886-7798(01)00049-9; Clough G.W., 1990, GEOTECH SP, P439; Fan QG, 2006, ROCK SOIL MECH, V27, P2169; Hsieh PG, 1998, CAN GEOTECH J, V35, P1004, DOI 10.1139/cgj-35-6-1004; Hu ZF, 2003, CAN GEO…	30	0	0	17	17	HINDAWI LTD	LONDON	ADAM HOUSE, 3RD FLR, 1 FITZROY SQ, LONDON, W1T 5HF, ENGLAND	1687-8086	1687-8094		ADV CIV ENG	Adv. Civ. Eng.	DEC 1	2020	2020
J	Jo, KN				Jo, Kyoung-nam			An ancient tufa in South Korea associated with topographic evolution from a stable cave environment to a near-surface environment	EPISODES			English	Article							CALCITE; DEPOSITS; SEDIMENTOLOGY; FRACTIONATION; GEOCHEMISTRY; RECOGNITION; TRAVERTINES; MORPHOLOGY; ISOTOPES; CARBON	Buried freshwater carbonates in the Moorungri region (Jeongseon-gun, South Korea) were discovered in 2003 during a local excavation for natural ornamental stones. Although the local government recently designated the Moorungri freshwater carbonates (MR-FC) as a potential natural monument based on its surficial beauty, the origin, processes, and depositional environments of the MR-FC are still unk…	[Jo, Kyoung-nam] Kangwon Natl Univ KNU, Div Geol & Geophys, 1 Kangwondaehak Gil, Chuncheon Si 24341, Gangwon Do, South Korea; [Jo, Kyoung-nam] Kangwon Natl Univ KNU, Crit Zone Frontier Res Lab CFRL, 1 Kangwondaehak Gil, Chuncheon Si 24341, Gangwon Do, South Korea	Jo, KN (corresponding author), Kangwon Natl Univ KNU, Div Geol & Geophys, 1 Kangwondaehak Gil, Chuncheon Si 24341, Gangwon Do, South Korea.; Jo, KN (corresponding author), Kangwon Natl Univ KNU, Crit Zone Frontier Res Lab CFRL, 1 Kangwondaehak Gil, Chuncheon Si 24341, Gangwon Do, South Korea.	kjo@kangwon.ac.kr			National Research Foundation of Korea (NRF) - Korean government (Ministry of Science and ICT) [NRF-2015R1A4A1041105, NRF-2016R1C1B2016525, NRF-2019R1H1A1101097]; Korea Basic Science Institute National Research Facilities & Equipment Center - Korean government (Ministry of Education) [2019R1A6C1010006]	This research was supported by a National Research Foundation of Korea (NRF) grant funded by the Korean government (Ministry of Science and ICT) (NRF-2015R1A4A1041105, NRF-2016R1C1B2016525, and NRF-2019R1H1A1101097). This work was also partially supported by a Korea Basic Science Institute National Research Facilities & Equipment Center grant funded by the Korean government (Ministry of Education…	Andrews JE, 1997, PALAEOGEOGR PALAEOCL, V129, P171, DOI 10.1016/S0031-0182(96)00120-4; Andrews JE, 2006, EARTH-SCI REV, V75, P85, DOI 10.1016/j.earscirev.2005.08.002; Arenas C, 2000, SEDIMENTOLOGY, V47, P883; Capezzuoli E, 2014, SEDIMENTOLOGY, V61, P1, DOI 10.1111/sed.12075; CHAFETZ HS, 1984, J SEDIMENT PETROL, V54, P289; Chough S.K., 2013, GEOLOGY SEDIMENTOLOG; DANDURAND JL, 1982, CHEM GEOL, V36…	32	0	0	3	3	GEOLOGICAL SOC KOREA	SEOUL	KOREA SCIENCE & TECHNOLOGY CTR, RM 813, 7 GIL 22, TEHERAN- RO, GANGNAM-GUNA, SEOUL, 06130, SOUTH KOREA	0705-3797			EPISODES	Episodes	DEC	2020	43	4
J	Dong, XJ; Karrech, A; Basarir, H; Elchalakani, M; Qi, CC				Dong, Xiangjian; Karrech, Ali; Basarir, Hakan; Elchalakani, Mohamed; Qi, Chongchong			Closed-Form Solution to the Poromechanics of Deep Arbitrary-Shaped Openings Subjected to Rock Mass Alteration	INTERNATIONAL JOURNAL OF GEOMECHANICS			English	Article						Closed-form solution; Arbitrary-shaped opening; Complex variable method; Deep excavation	ELASTIC SOLUTION; CROSS-SECTION; STRESS; TUNNELS; PLATE; HOLE; DISPLACEMENT; PRESSURE; SUPPORT; PLANE	The aim of this paper is to propose a closed-form solution to the poromechanics problem of stress and pore pressure distribution around noncircular openings at great depth subjected to hydrostatic water pressure and far-field geostresses. The problem is solved by superposing the effects of fluid and solid skeleton obtained over simple circular geometries and generalizing the obtained expression t…	[Dong, Xiangjian; Karrech, Ali; Basarir, Hakan; Elchalakani, Mohamed; Qi, Chongchong] Univ Western Australia, Dept Civil Environm & Min Engn, 35 Stirling Hwy, Crawley, WA 6009, Australia; [Basarir, Hakan] Norwegian Univ Sci & Technol, Dept Petr Geosci, Trondheim, Norway	Karrech, A (corresponding author), Univ Western Australia, Dept Civil Environm & Min Engn, 35 Stirling Hwy, Crawley, WA 6009, Australia.	ali.karrech@uwa.edu.au	Qi, Chongchong/K-1167-2019; Basarir, Hakan/C-2237-2014	Qi, Chongchong/0000-0001-5189-1614; Elchalakani, Mohamed/0000-0002-9018-0572; Dong, Xiangjian/0000-0002-0900-189X; Karrech, Ali/0000-0001-7013-319X; Basarir, Hakan/0000-0003-4556-4953	China Scholarship Council (CSC)China Scholarship Council [201606420056]	The first author would like to acknowledge financial support provided by the China Scholarship Council (CSC) under grant number 201606420056. The authors would like to thank the anonymous reviewers for their considerable effort in improving the paper.	Ahmed S, 2019, INT J ROCK MECH MIN, V114, P62, DOI 10.1016/j.ijrmms.2018.12.019; Biot M., 1957, J APPL MECH, V44, P594, DOI DOI 10.1002/9780470172766.CH13; Bobet A, 2003, TUNN UNDERGR SP TECH, V18, P377, DOI 10.1016/S0886-7798(03)00008-7; Cai MF., 2002, ROCK MECH ENG; Chauhan MM, 2015, INT J MECH SCI, V101, P272, DOI 10.1016/j.ijmecsci.2015.08.007; Dienstmann G, 2018, COMPUT GEOTECH, V97, P134, D…	47	0	0	5	5	ASCE-AMER SOC CIVIL ENGINEERS	RESTON	1801 ALEXANDER BELL DR, RESTON, VA 20191-4400 USA	1532-3641	1943-5622		INT J GEOMECH	Int. J. Geomech.	DEC 1	2020	20	12
J	Shi, C; Yang, B; Zhang, YP; Yang, JX				Shi, Chong; Yang, Bo; Zhang, Yiping; Yang, Junxiong			Application of Discrete-Element Numerical Simulation for Calculating the Stability of Dangerous Rock Mass: A Case Study	INTERNATIONAL JOURNAL OF GEOMECHANICS			English	Article						Unstable rock masses; Stability; Discrete element; Intensity reduction method	MECHANICAL-PROPERTIES; LIMIT ANALYSIS; SLOPE; MODELS	An unstable rock mass is a common geological hazard in water conservancy and hydropower engineering in southwest China. The mechanical properties of a rock mass joint and the internal and external physical environment are closely related. In this study, the factors to evaluate the stability of a dangerous rock mass and the geological conditions of a highway slope in Yunnan Province will be evalua…	[Shi, Chong; Yang, Bo; Zhang, Yiping; Yang, Junxiong] Hohai Univ, Minist Educ Geomech & Embankment Engn, Key Lab, 1 Xikang Rd, Nanjing 210098, Peoples R China; [Shi, Chong; Yang, Bo; Zhang, Yiping; Yang, Junxiong] Hohai Univ, Res Inst Geotech Engn, 1 Xikang Rd, Nanjing 210098, Peoples R China	Yang, B (corresponding author), Hohai Univ, Minist Educ Geomech & Embankment Engn, Key Lab, 1 Xikang Rd, Nanjing 210098, Peoples R China.; Yang, B (corresponding author), Hohai Univ, Res Inst Geotech Engn, 1 Xikang Rd, Nanjing 210098, Peoples R China.	hero_yangbo@163.com		shi, chong/0000-0003-1386-0651; Yang, Junxiong/0000-0002-8726-7909	National Natural Science Foundation of ChinaNational Natural Science Foundation of China (NSFC) [41831278, 51679071]; National Key R&D Program of China [2018YFC1508501]; Natural Science Foundation of Jiangsu ProvinceNatural Science Foundation of Jiangsu Province [BK20171434]	The work presented in this study was financially supported by the National Natural Science Foundation of China (Grants Nos. 41831278 and 51679071), the National Key R&D Program of China (2018YFC1508501), and the Natural Science Foundation of Jiangsu Province (Grant No. BK20171434).	Bonilla-Sierra V, 2015, ACTA GEOTECH, V10, P497, DOI 10.1007/s11440-015-0374-z; Colombero C, 2017, J GEOPHYS RES-SOL EA, V122, P6346, DOI 10.1002/2017JB014111; Conte E, 2014, LANDSLIDES, V11, P723, DOI 10.1007/s10346-013-0446-9; Dawson EM, 1999, GEOTECHNIQUE, V49, P835, DOI 10.1680/geot.1999.49.6.835; De Novellis V, 2016, REMOTE SENS-BASEL, V8, DOI 10.3390/rs8080670; Griffiths DV, 1999, GEOTECHNI…	26	2	2	24	24	ASCE-AMER SOC CIVIL ENGINEERS	RESTON	1801 ALEXANDER BELL DR, RESTON, VA 20191-4400 USA	1532-3641	1943-5622		INT J GEOMECH	Int. J. Geomech.	DEC 1	2020	20	12
J	Zou, JQ; Han, JH; Zhang, T; Yang, WH				Zou, Jiuqun; Han, Jihuan; Zhang, Tao; Yang, Weihao			Experimental Investigation and Numerical Analyses for Red Sandstone Rock Fragmentation	INTERNATIONAL JOURNAL OF GEOMECHANICS			English	Article						Rock fragmentation; Initial stress conditions; Indentation test; Breaking parameters; DEM; Red sandstone	CONFINING STRESS; INDENTATION TESTS; PARTICLE MODEL; CUTTING TESTS; PERFORMANCE; EXCAVATION; BREAKING; BEHAVIOR	The effects of initial stress conditions and rock breaking parameters on rock fragmentation were investigated through indentation tests and numerical analysis with a discrete element method (DEM). Different initial stress conditions and the thrusting velocity of the cutter were the focus in the design of indentation tests. Some indicators were used to reflect the instability of the thrusting forc…	[Zou, Jiuqun; Han, Jihuan; Zhang, Tao] China Univ Min & Technol, State Key Lab Geomech & Deep Underground Engn, Xuzhou 221116, Jiangsu, Peoples R China; [Yang, Weihao] China Univ Min & Technol, Sch Mech & Civil Engn, Xuzhou 221116, Jiangsu, Peoples R China	Yang, WH (corresponding author), China Univ Min & Technol, Sch Mech & Civil Engn, Xuzhou 221116, Jiangsu, Peoples R China.	tb15220027b0@cumt.edu.cn; hanjhcumt@sina.com; zhangtao080818@163.com; whyang@cumt.edu.cn			National Key Research and Development Program of China [2016YFC0600904]	The research was supported by the National Key Research and Development Program of China (Grant No. 2016YFC0600904).	Alehossein H, 2000, ROCK MECH ROCK ENG, V33, P267, DOI 10.1007/s006030070003; Balci C, 2007, INT J ROCK MECH MIN, V44, P468, DOI 10.1016/j.ijrmms.2006.09.001; Balci C, 2004, J S AFR I MIN METALL, V104, P633; Bilgin N, 2006, INT J ROCK MECH MIN, V43, P139, DOI 10.1016/j.ijrmms.2005.04.009; Cai M., 1995, PRINCIPLE TECHNOLOGY; Chen LH, 2006, INT J ROCK MECH MIN, V43, P1023, DOI 10.1016/j.ijrmms.2006…	43	0	0	22	22	ASCE-AMER SOC CIVIL ENGINEERS	RESTON	1801 ALEXANDER BELL DR, RESTON, VA 20191-4400 USA	1532-3641	1943-5622		INT J GEOMECH	Int. J. Geomech.	DEC 1	2020	20	12
J	Huo, XF; Shi, XZ; Qiu, XY; Zhou, J; Gou, YG; Yu, Z; Ke, WY				Huo, Xiaofeng; Shi, Xiuzhi; Qiu, Xianyang; Zhou, Jian; Gou, Yonggang; Yu, Zhi; Ke, Wuyang			Rock damage control for large-diameter-hole lateral blasting excavation based on charge structure optimization	TUNNELLING AND UNDERGROUND SPACE TECHNOLOGY			English	Article						Rock damage control; Large-diameter hole; Lateral blasting; Charge structure; Numerical simulation	NUMERICAL-SIMULATION; VIBRATION; DESIGN; FRAGMENTATION	Controlling rock damage induced by lateral blasting excavation is a source of concern. In underground mines, large-diameter-hole lateral blasting excavation often causes engineering disasters such as large blocks falling and overall collapse of the remaining rock mass. Because of their high cost and cumbersome operation, conventional contour blasting techniques, such as smooth and presplit blasti…	[Huo, Xiaofeng; Shi, Xiuzhi; Qiu, Xianyang; Zhou, Jian; Gou, Yonggang; Yu, Zhi; Ke, Wuyang] Cent South Univ, Sch Resources & Safety Engn, Changsha 410083, Peoples R China	Shi, XZ; Gou, YG (corresponding author), Cent South Univ, Sch Resources & Safety Engn, Changsha 410083, Peoples R China.	huoxiaofeng@csu.edu.cn; baopo@csu.edu.cn; gouyonggang@csu.edu.cn; yuzhi_blasting@csu.edu.cn; kewuyang@csu.edu.cn			National Natural Science Foundation Project of ChinaNational Natural Science Foundation of China (NSFC) [51874350, 41807259]; National Key Research and Development Program of China [2017YFC0602902]	The authors acknowledge the financial support from the National Natural Science Foundation Project of China (grant numbers 51874350 and 41807259) and the National Key Research and Development Program of China (grant number 2017YFC0602902) for carrying out this research work.	Ambrosini RD, 2002, SHOCK WAVES, V12, P69, DOI 10.1007/s00193-002-0136-3; BLAIR DP, 1985, GEOPHYSICS, V50, P1676, DOI 10.1190/1.1441858; Chen X, 2020, CONSTR BUILD MATER, V246, DOI 10.1016/j.conbuildmat.2020.118520; Chen X, 2020, MATERIALS, V13, DOI 10.3390/ma13030718; Cui J, 2018, CONSTR BUILD MATER, V160, P440, DOI 10.1016/j.conbuildmat.2017.11.083; Dong Q, 2015, AER ADV ENG RES, V23, P668; Bas…	43	2	2	26	26	PERGAMON-ELSEVIER SCIENCE LTD	OXFORD	THE BOULEVARD, LANGFORD LANE, KIDLINGTON, OXFORD OX5 1GB, ENGLAND	0886-7798			TUNN UNDERGR SP TECH	Tunn. Undergr. Space Technol.	DEC	2020	106
J	Ma, K; Feng, B; Zhuang, DY; Guo, XF; Gao, Q				Ma, K.; Feng, B.; Zhuang, D. Y.; Guo, X. F.; Gao, Q.			Distance effects of the fault on the surrounding rock mass stability of the main powerhouse at the Huanggou pumped-storage power station	TUNNELLING AND UNDERGROUND SPACE TECHNOLOGY			English	Article						Underground powerhouse; Distance effect; Microseismic monitoring; Numerical simulation; Fault	HYDROPOWER STATION; ACOUSTIC-EMISSION; TUNNEL; FAILURE; DEFORMATION; SYSTEM; ZONE; CAVERNS	The distance between the fault and the underground cavern affects the surrounding rock mass stability, which is of great importance to the design and construction of the large-scale underground cavern especially the underground powerhouse. This study focuses on the distance effects of the fault on the rock mass stability of the main powerhouse at the Huanggou pumped-storage power station. Firstly…	[Ma, K.; Feng, B.; Gao, Q.] Dalian Univ Technol, State Key Lab Coastal & Offshore Engn, Dalian 116024, Liaoning, Peoples R China; [Ma, K.; Feng, B.; Gao, Q.] Dalian Univ Technol, Inst Rock Instabil & Seismic Res, Dalian 116024, Liaoning, Peoples R China; [Zhuang, D. Y.] Zhejiang Univ, Ctr Hypergrav Expt & Interdisciplinary Res, Hangzhou 310058, Zhejiang, Peoples R China; [Zhuang, D. Y.] Zhejiang …	Zhuang, DY (corresponding author), Zhejiang Univ, Ctr Hypergrav Expt & Interdisciplinary Res, Hangzhou 310058, Zhejiang, Peoples R China.	zhuangdy@zju.edu.cn			National Natural Science Foundation of ChinaNational Natural Science Foundation of China (NSFC) [41941018]; SpecialFunded Program on National Key Scientific Instruments and Equipment Development [51627804]; National Key Research and Development Plan of China [2017YFC1503103]	This research was supported by the National Natural Science Foundation of China (Grant nos.51774064 and 51974055), the SpecialFunded Program on National Key Scientific Instruments and Equipment Development (No.51627804), the National Key Research and Development Plan of China (Grant No. 2017YFC1503103), and the National Natural Science Foundation of China (No.41941018).	Abdollahi MS, 2019, TUNN UNDERGR SP TECH, V88, P186, DOI 10.1016/j.tust.2019.03.008; Bian K, 2016, TUNN UNDERGR SP TECH, V54, P123, DOI 10.1016/j.tust.2015.10.030; Dai F, 2016, INT J ROCK MECH MIN, V86, P269, DOI 10.1016/j.ijrmms.2016.05.001; Gao Q., 2019, TUNNEL CONSTR, V39, P775; GIBOWICZ SJ, 1991, B SEISMOL SOC AM, V81, P1157; Hao YH, 2005, TUNN UNDERGR SP TECH, V20, P49, DOI 10.1016/j.tust.20…	35	1	1	15	15	PERGAMON-ELSEVIER SCIENCE LTD	OXFORD	THE BOULEVARD, LANGFORD LANE, KIDLINGTON, OXFORD OX5 1GB, ENGLAND	0886-7798			TUNN UNDERGR SP TECH	Tunn. Undergr. Space Technol.	DEC	2020	106
J	Cao, JC; Zhang, N; Wang, SY; Qian, DY; Xie, ZZ				Cao, Juncai; Zhang, Nong; Wang, Shanyong; Qian, Deyu; Xie, Zhengzheng			Physical model test study on support of super pre-stressed anchor in the mining engineering	ENGINEERING FAILURE ANALYSIS			English	Article						Failure process; Physical model test; Super pre-stressed anchor; Rock mechanics; Dynamic disaster	ENERGY-ABSORBING BOLT; COAL-MINE; ROADWAY; ROCK; FAILURE	With the increase in mining depths, support problems of anchor such as roof accidents and large deformation of soft rock are becoming more and more prominent. Whether the anchor is suitable for deep roadway support has been questioned. In order to explore this problem, this paper studies the ultimate support effect of super pre-stressed anchors. Based on current higher prestress support technolog…	[Cao, Juncai; Zhang, Nong; Qian, Deyu; Xie, Zhengzheng] China Univ Min & Technol, Sch Mines, Key Lab Deep Coal Resource Min, Minist Educ China, Xuzhou 221116, Jiangsu, Peoples R China; [Cao, Juncai; Wang, Shanyong] Univ Newcastle, ARC Ctr Excellence Geotech Sci & Engn Civil Surve, Callaghan, NSW 2308, Australia	Zhang, N (corresponding author), China Univ Min & Technol, Sch Mines, Key Lab Deep Coal Resource Min, Minist Educ China, Xuzhou 221116, Jiangsu, Peoples R China.	zhangnong@126.com			joint Ph.D. program of "double first rate construction disciplines of CUMT	Supported by joint Ph.D. program of "double first rate construction disciplines of CUMT.	Angelo C., 2017, COMPOS STRUCT, V181, P336; Chen H., 2009, CHIN J ROCK MECH ENG, V28, P2922; Chen LB, 2014, INT J ROCK MECH MIN, V70, P559, DOI 10.1016/j.ijrmms.2014.06.003; [范鹏贤 Fan Pengxian], 2016, [采矿与安全工程学报, Journal of Mining & Safety Engineering], V33, P146; [范鹏贤 Fan Pengxian], 2014, [岩石力学与工程学报, Chinese Journal of Rock Mechanics and Engineering], V33, P1843; Feng XW, 2017, GEOTECH TEST J, V4…	28	2	2	56	56	PERGAMON-ELSEVIER SCIENCE LTD	OXFORD	THE BOULEVARD, LANGFORD LANE, KIDLINGTON, OXFORD OX5 1GB, ENGLAND	1350-6307	1873-1961		ENG FAIL ANAL	Eng. Fail. Anal.	DEC	2020	118
J	Chen, M; Ye, ZW; Lu, WB; Wei, D; Yan, P				Chen, Ming; Ye, Zhiwei; Lu, Wenbo; Wei, Dong; Yan, Peng			An improved method for calculating the peak explosion pressure on the borehole wall in decoupling charge blasting	INTERNATIONAL JOURNAL OF IMPACT ENGINEERING			English	Article						Contour blasting; Decoupling charge; Peak explosion pressure; Pressure increase ratio	ROCK DAMAGE; EXCAVATION; SIMULATION; WAVES; GAS	The peak explosion pressure acting on the borehole wall in decoupling charge blasting was investigated by employing analytical, numerical, and experimental approaches. The theoretical solution of the pressure increase ratio after collision between an air shock wave and an elastic wall was derived to analyse factors influencing the peak explosion pressure acting on the borehole wall. A numerical s…	[Chen, Ming; Ye, Zhiwei; Lu, Wenbo; Wei, Dong; Yan, Peng] Wuhan Univ, State Key Lab Water Resources & Hydropower Engn S, Wuhan 430072, Peoples R China; [Chen, Ming; Ye, Zhiwei; Lu, Wenbo; Wei, Dong; Yan, Peng] Wuhan Univ, Key Lab Rock Mech Hydraul Struct Engn, Minist Educ, Wuhan 430072, Peoples R China	Chen, M (corresponding author), Wuhan Univ, State Key Lab Water Resources & Hydropower Engn S, Wuhan 430072, Peoples R China.; Chen, M (corresponding author), Wuhan Univ, Key Lab Rock Mech Hydraul Struct Engn, Minist Educ, Wuhan 430072, Peoples R China.	whuchm@whu.edu.cn			Chinese National Natural Science FoundationNational Natural Science Foundation of China (NSFC) [51779193, 51979205]	This work is supported by the Chinese National Natural Science Foundation (51779193, 51979205). The authors wish to express their thanks to the supporter.	Benselama AM, 2010, INT J IMPACT ENG, V37, P385, DOI 10.1016/j.ijimpeng.2009.08.003; Borovikov VA, 1975, SOVIET MIN, V11, P493, DOI [10.1007/BF02499366, DOI 10.1007/BF02499366]; CAI F, 2011, P ENG, V26, P418, DOI DOI 10.1016/J.PR0ENG.2011.11.2187; Ceng Y, 2005, PRESSURE VESSEL TECH, V22, P15; Dai J., 2013, DYNAMIC BEHAV BLASTI, V2; Dehghan Banadaki MM, 2008, P 5 AS ROCK MECH S A, P933; Feldgun VR…	37	1	1	17	22	PERGAMON-ELSEVIER SCIENCE LTD	OXFORD	THE BOULEVARD, LANGFORD LANE, KIDLINGTON, OXFORD OX5 1GB, ENGLAND	0734-743X	1879-3509		INT J IMPACT ENG	Int. J. Impact Eng.	DEC	2020	146
J	Lin, S; Zheng, H; Jiang, W; Li, W; Sun, GH				Lin, Shan; Zheng, Hong; Jiang, Wei; Li, Wei; Sun, Guanhua			Investigation of the excavation of stony soil slopes using the virtual element method	ENGINEERING ANALYSIS WITH BOUNDARY ELEMENTS			English	Article						Slope; Virtual element method; Finite element method; Stony soil slope; Excavation; Shear strength reduction	SHEAR-STRENGTH; STABILITY ANALYSIS; ROCK-MIXTURE; PARTICLE-SHAPE; DEFORMATION; BEHAVIOR; PROPAGATION; MODEL	This study improved two parts of the virtual element method (VEM) to ensure that the stability of a stony soil slope, especially under excavation conditions, could be better studied. One of the improvements was the specific realization of the excavation algorithm, including the determination of how to identify polygonal elements that needed to be excavated, and the "deactivate and reactivate poly…	[Lin, Shan; Zheng, Hong] Beijing Univ Technol, Key Lab Urban Secur & Disaster Engn, Minist Educ, Beijing 100124, Peoples R China; [Jiang, Wei] China Three Gorges Univ, Coll Civil Engn & Architecture, Yichang 443002, Peoples R China; [Li, Wei] Linyi Univ, Sch Civil Engn & Architecture, Linyi 276000, Shandong, Peoples R China; [Sun, Guanhua] Chinese Acad Sci, Inst Rock & Soil Mech, State Key Lab Ge…	Sun, GH (corresponding author), Chinese Acad Sci, Inst Rock & Soil Mech, State Key Lab Geomech & Geotech Engn, Wuhan 430071, Peoples R China.	ghsun@whrsm.ac.cn			National Key R&D Program of China [2018YFE0100100]; Natural Science Foundation of ChinaNational Natural Science Foundation of China (NSFC) [11972043, 11902134]; Open Research Fund of the State Key Laboratory of Geomechanics and Geotechnical Engineering, Institute of Rock and Soil Mechanics; Chinese Academy of SciencesChinese Academy of Sciences [Z019008]	Supported by the National Key R&D Program of China (2018YFE0100100), Natural Science Foundation of China (Grant No. 11972043 and 11902134), Open Research Fund of the State Key Laboratory of Geomechanics and Geotechnical Engineering, Institute of Rock and Soil Mechanics, and Chinese Academy of Sciences (Z019008). We thank LetPub (www.letpub.com) for its linguistic assistance during the preparation…	Abramson LW, 1995, SLOPE STABILITY STAB, P629; Afifipour M, FAILURE PATTERNS GEO, V7, P2781; Afifipour M, 2014, ARAB J GEOSCI, V7, P2781, DOI 10.1007/s12517-013-0907-4; Alaei E, 2012, GRANUL MATTER, V14, P707, DOI 10.1007/s10035-012-0367-7; Aldakheel F, 2018, COMPUT METHOD APPL M, V341, P443, DOI 10.1016/j.cma.2018.07.008; Areias P, 2017, FINITE ELEM ANAL DES, V132, P27, DOI 10.1016/j.finel.2017.…	67	0	0	6	6	ELSEVIER SCI LTD	OXFORD	THE BOULEVARD, LANGFORD LANE, KIDLINGTON, OXFORD OX5 1GB, OXON, ENGLAND	0955-7997	1873-197X		ENG ANAL BOUND ELEM	Eng. Anal. Bound. Elem.	DEC	2020	121
J	Liu, HZ; Lin, JS; He, JD; Xie, HQ				Liu, Huaizhong; Lin, Jeen-Shang; He, Jiangda; Xie, Hongqiang			A discrete element exploration of V-shaped breakout failure mechanisms in underground opening	UNDERGROUND SPACE			English	Article						Tensile spalling; Shear fracturing; V-shaped breakouts; Mine-by tunnel; Discrete element method	BRITTLE FAILURE; STRESS ORIENTATIONS; BOREHOLE BREAKOUTS; PARTICLE MODEL; KM DEPTH; ROCK; INSTABILITY; SIMULATION; PARAMETERS; FRACTURES	V-shaped breakouts, which may appear in underground opening during excavation, are the results of two different failure mechanisms: tensile spalling and shear fracturing. This study uses discrete elements in exploring the conditions that would lead to different breakout mechanisms under plane strain conditions. The test tunnel of the Mine-by Experiment in Lac du Bonnet granite batholith is adopte…	[Liu, Huaizhong; He, Jiangda; Xie, Hongqiang] Sichuan Univ, Coll Water Resources & Hydropower, State Key Lab Hydraul & Mt River Engn, Chengdu 610065, Sichuan, Peoples R China; [Liu, Huaizhong; Lin, Jeen-Shang] Univ Pittsburgh, Dept Civil & Environm Engn, Pittsburgh, PA 15261 USA; [Lin, Jeen-Shang] Univ Pittsburgh, Dept Mech Engn & Mat Sci, Pittsburgh, PA 15261 USA; [Lin, Jeen-Shang] Univ Pittsbur…	Lin, JS (corresponding author), Univ Pittsburgh, Dept Civil & Environm Engn, Pittsburgh, PA 15261 USA.	jslin@pitt.edu		Liu, Huai-Zhong/0000-0002-3790-5108	China Scholarship CouncilChina Scholarship Council; National Key Research and Development Program of China [2017YFC1501104]; National Natural Science Foundation of ChinaNational Natural Science Foundation of China (NSFC) [51079092]	The authors would like to acknowledge the financial support of China Scholarship Council for study in the United States, and the accommodation provided by the Department of Civil and Environmental Engineering, University of Pittsburgh. The authors would also acknowledge the funding of National Key Research and Development Program of China (2017YFC1501104) and National Natural Science Foundation o…	Altindag R, 2010, SCI RES ESSAYS, V5, P2107; Bahrani N., 2011, 45 US ROCK MECH GEOM; Bardet JP, 1992, MECH GRANULAR MAT PO, V37, P85; Bazant ZP, 1986, MAT STRU, V19, P111; Boutt D., 2002, DISCRETE ELEMENT MET, P86, DOI DOI 10.1061/40647(259)16; Brudy M, 1997, J GEOPHYS RES-SOL EA, V102, P18453, DOI 10.1029/96JB02942; Cai M, 2014, ROCK MECH ROCK ENG, V47, P659, DOI 10.1007/s00603-013-0437-0; Cho N…	56	0	0	10	16	KEAI PUBLISHING LTD	BEIJING	16 DONGHUANGCHENGGEN NORTH ST, BEIJING, DONGHENG DISTRICT 100717, PEOPLES R CHINA	2096-2754	2467-9674		UNDERGR SPACE	Undergr. Space	DEC	2020	5	4
J	Zou, JF; Liu, L; Xia, MY				Zou, Jinfeng; Liu, Lu; Xia, Mingyao			Simple approach for solution of the quasi-plane-strain problem in a circular tunnel in a strain-softening rock mass considering the out-of-plane stress effect	UNDERGROUND SPACE			English	Article						Quasi-plane-strain problem; Plastic strain; Out-of-plane stress; Three-dimensional plastic potential function; Deformation dependence	GROUND RESPONSE CURVES; ELASTOPLASTIC SOLUTION	The out-of-plane stress is sometimes the major or intermediate principal stress in a circular tunnel opening. The influences of the out-of-plane stress and axial strain are often neglected in the stability analyses of tunnel excavation, which can induce significant errors in the determination of surrounding rock deformations. In this paper, the use of a simple approach is proposed to solve the qu…	[Zou, Jinfeng; Liu, Lu; Xia, Mingyao] Cent South Univ, Sch Civil Engn, Changsha 410075, Peoples R China	Xia, MY (corresponding author), Cent South Univ, Sch Civil Engn, Changsha 410075, Peoples R China.	164811130@csu.edu.cn; xiamingyao@csu.edu.cn			National Basic Research Program of China (``973"Project)National Basic Research Program of China [2013CB036004]; National Natural Science Foundation of ChinaNational Natural Science Foundation of China (NSFC) [51208523]	This work was supported by the National Basic Research Program of China (``973"Project) (Grant No. 2013CB036004) and the National Natural Science Foundation of China (Grant No. 51208523).	Alonso E, 2003, INT J NUMER ANAL MET, V27, P1153, DOI 10.1002/nag.315; BROWN ET, 1983, J GEOTECH ENG-ASCE, V109, P15, DOI 10.1061/(ASCE)0733-9410(1983)109:1(15); Carranza-Torres C, 2004, INT J ROCK MECH MIN, V41, P480, DOI 10.1016/j.ijrmms.2003.12.014; Carranza-Torres C, 2003, ROCK MECH ROCK ENG, V36, P237, DOI 10.1007/s00603-002-0048-7; Carranza-Torres C, 1999, INT J ROCK MECH MIN, V36, P777, DO…	21	0	0	3	4	KEAI PUBLISHING LTD	BEIJING	16 DONGHUANGCHENGGEN NORTH ST, BEIJING, DONGHENG DISTRICT 100717, PEOPLES R CHINA	2096-2754	2467-9674		UNDERGR SPACE	Undergr. Space	DEC	2020	5	4
J	Chang, Y; Chang, LS; Ren, FQ				Chang, Yuan; Chang, Laishan; Ren, Fuqiang			Strength anisotropy of jointed rock slope considering mining damage: a numerical analysis method	GEOMATICS NATURAL HAZARDS & RISK			English	Article						Jointed rock slope; strength anisotropy; mining probabilistic damage; disturbance coefficient		A combination of Hoek-Brown strength criterion and geological strength index (GSI) rock mass classification is a common method to determine rock mass strength. However, the conventional method involving the determination of disturbance coefficient (D) cannot reflect the anisotropic characteristics of strength of jointed rock mass when considering mining damage. A numerical analysis method is prop…	[Chang, Yuan; Ren, Fuqiang] Univ Sci & Technol Liaoning, Sch Civil Engn, Anshan, Peoples R China; [Chang, Laishan] Univ Sci & Technol Liaoning, Sch Min Engn, Anshan, Peoples R China; [Ren, Fuqiang] State Key Lab Geomech & Deep Underground Engn, Beijing, Peoples R China	Ren, FQ (corresponding author), Univ Sci & Technol Liaoning, Sch Civil Engn, Anshan, Peoples R China.; Ren, FQ (corresponding author), State Key Lab Geomech & Deep Underground Engn, Beijing, Peoples R China.	xq1050211@163.com			National Key Research and Development Program [2016YFC0801603]; Province Education Department of LiaoNing [2020LNQN04]	Financial support from the National Key Research and Development Program (Grant No. 2016YFC0801603) and Province Education Department of LiaoNing (Grant No. 2020LNQN04) are gratefully acknowledged.	ASHBY MF, 1986, ACTA METALL MATER, V34, P497, DOI 10.1016/0001-6160(86)90086-6; Barton N., 1974, ROCK MECH, V6, P189, DOI [DOI 10.1007/BF01239496, 10.1007/bf01239496]; Bastola S, 2020, INT J ROCK MECH MIN, V126, DOI 10.1016/j.ijrmms.2019.104191; Bieniawski Z, 1973, CIV ENG S AFR, DOI 10.1016/0148-9062(74)90924-3; BIENIAWSKI ZT, 1978, INT J ROCK MECH MIN, V15, P237, DOI 10.1016/0148-9062(78)90956-…	38	0	0	5	5	TAYLOR & FRANCIS LTD	ABINGDON	2-4 PARK SQUARE, MILTON PARK, ABINGDON OR14 4RN, OXON, ENGLAND	1947-5705	1947-5713		GEOMAT NAT HAZ RISK	Geomat. Nat. Hazards Risk	NOV 30	2020	11	1
J	Yang, LY; Chen, SY; Dong, PX; Wang, QC; Huang, C				Yang, Liyun; Chen, Siyu; Dong, Pengxiang; Wang, Qingcheng; Huang, Chen			Orthogonal Analysis and Numerical Simulation of Rock Mechanics Parameters in Stress Field of Shaft Heading Face	ADVANCES IN MATERIALS SCIENCE AND ENGINEERING			English	Article								This paper focuses on improving the blasting effect of the drilling and blasting method in the deep rock mass and solves the problems of blasthole collapse and misfire accident in the process of drilling and blasting construction of heading face. FEM software, ABAQUS, is used to simulate the stress distribution around the blasthole by extending a certain depth in the vertical direction of the sha…	[Yang, Liyun; Chen, Siyu; Dong, Pengxiang; Wang, Qingcheng; Huang, Chen] China Univ Min & Technol, Sch Mech & Civil Engn, Beijing Campus, Beijing, Peoples R China	Chen, SY (corresponding author), China Univ Min & Technol, Sch Mech & Civil Engn, Beijing Campus, Beijing, Peoples R China.	yangly@cumtb.edu.cn; bqt1900604029@student.cumtb.edu.cn; dong_px@163.com; wangqc91@sina.com; huangchen4510@sina.com		chen, chensiyu/0000-0001-6726-0956	National Nature Science Foundation of ChinaNational Natural Science Foundation of China (NSFC) [51974316, 800015Z1125]	This research was supported by the National Nature Science Foundation of China (no. 51974316) and the Sun Yueqi Young Scholar Foundation (no. 800015Z1125).	Cardu M, 2016, TUNN UNDERGR SP TECH, V60, P178, DOI 10.1016/j.tust.2016.08.010; Corkum AG, 2018, INT J ROCK MECH MIN, V107, P75, DOI 10.1016/j.ijrmms.2018.04.035; Fu J. J., 2005, J MINING SAFETY ENG, V26, P70; Gao F. Q., 2008, J MINING SAFETY ENG, V1, P95; Jendry M., 2019, IOP C SERIES EARTH E, V261; Jiang J. S., 2019, CHINESE J GEOTECHNIC, V41, P189; [李军 Li Jun], 2011, [岩石力学与工程学报, Chinese Journa…	23	0	0	3	3	HINDAWI LTD	LONDON	ADAM HOUSE, 3RD FLR, 1 FITZROY SQ, LONDON, W1T 5HF, ENGLAND	1687-8434	1687-8442		ADV MATER SCI ENG	Adv. Mater. Sci. Eng.	NOV 27	2020	2020
J	Chen, W; Wan, W; Lian, SL; Xie, SL; Zhou, Y; Peng, WQ; Kuang, WL; Wang, XQ; Tong, SS				Chen, Wei; Wan, Wen; Lian, Shuailong; Xie, Senlin; Zhou, Yu; Peng, Wenqing; Kuang, Wenlong; Wang, Xianqing; Tong, Shasha			Mechanical Properties and Failure Modes of Thick-Walled Cylinder Granites with Different Apertures under Triaxial Compression	ADVANCES IN CIVIL ENGINEERING			English	Article							INTERMEDIATE PRINCIPAL STRESS; HOLLOW CYLINDERS; STRAIN RELATION; ROCK MASSES; STRENGTH; BEHAVIOR; SANDSTONE; LOCALIZATION; DEFORMATION; FRACTURE	Roadway excavation changes the original equilibrium stress state of the rock mass, resulting in the loading and unloading of the surrounding rock near the free surface. After the excavation, the tangential stress increases and the radial stress decreases, which mainly cause deformation and collapse of the roadway. In order to study the strength characteristics of the surrounding rock after the ex…	[Chen, Wei; Wan, Wen; Zhou, Yu; Peng, Wenqing; Kuang, Wenlong; Wang, Xianqing] Hunan Univ Sci & Technol, Sch Resource Environm & Safety Engn, Xiangtan 411201, Hunan, Peoples R China; [Lian, Shuailong] Guizhou Univ, Sch Civil Engn, Guiyang 550025, Guizhou, Peoples R China; [Xie, Senlin] China Univ Min & Technol Beijing, Sch Energy & Min Engn, Beijing 100083, Peoples R China; [Tong, Shasha] Hunan U…	Wan, W (corresponding author), Hunan Univ Sci & Technol, Sch Resource Environm & Safety Engn, Xiangtan 411201, Hunan, Peoples R China.	180101020001@mail.hnust.edu.cn; wanwenhunst@163.com; 473695096@qq.com; 504201934@qq.com; 932178230@qq.com; pengwenqing@163.com; 64022885@qq.com; 384019741@qq.com; 1185614258@qq.com			National Natural Science Foundation of ChinaNational Natural Science Foundation of China (NSFC) [51774132, 51774131, 51974118]; Natural Science Foundation of Hunan ProvinceNatural Science Foundation of Hunan Province [2020JJ5188]; Research Project of Department of Natural Resources of Hunan Province [2020-10]	The authors thank Xinyu Ding and Zhenxing Lu for useful discussions and early contributions to the project and Min Wang for very helpful comments on the manuscript. This research was funded by the National Natural Science Foundation of China (Grants nos. 51774132, 51774131 and 51974118), the Natural Science Foundation of Hunan Province (Grants nos. 2020JJ5188), and the Research Project of Departm…	Aladejare AE, 2019, GEOTECH GEOL ENG, V37, P5045, DOI 10.1007/s10706-019-00961-7; Alsayed MI, 2002, INT J ROCK MECH MIN, V39, P355, DOI 10.1016/S1365-1609(02)00030-8; Cai M, 2008, INT J ROCK MECH MIN, V45, P763, DOI 10.1016/j.ijrmms.2007.07.026; Cai M, 2004, INT J ROCK MECH MIN, V41, P833, DOI 10.1016/j.ijrmms.2004.02.001; Cao RH, 2018, ARCH CIV MECH ENG, V18, P198, DOI 10.1016/j.acme.2017.06.010…	76	0	0	1	1	HINDAWI LTD	LONDON	ADAM HOUSE, 3RD FLR, 1 FITZROY SQ, LONDON, W1T 5HF, ENGLAND	1687-8086	1687-8094		ADV CIV ENG	Adv. Civ. Eng.	NOV 26	2020	2020
J	Xu, WS; Zhao, GM; Liu, CY; Meng, XR; Zhang, RF; Kao, SM; Huang, SJ; Zhou, J; Peng, R				Xu, Wensong; Zhao, Guangming; Liu, Chongyan; Meng, Xiangrui; Zhang, Ruofei; Kao, Siming; Huang, Shunjie; Zhou, Jun; Peng, Rui			Evolution Mechanism of Deformation and Failure of Surrounding Rock during Excavation and Unloading of the High-Stress Rock Mass	ADVANCES IN CIVIL ENGINEERING			English	Article							FACE	To deeply analyze the failure evolution of surrounding rock during excavation-induced unloading of the high-stress rock mass, a multistage failure model was established based on revealed failure patterns. The critical conditions for wing cracks were determined. The slab crack buckling analysis was carried out. The true-triaxial rockburst testing system was used for the miniature model test to stu…	[Xu, Wensong; Zhao, Guangming; Liu, Chongyan; Meng, Xiangrui; Zhang, Ruofei; Kao, Siming; Huang, Shunjie; Zhou, Jun] Anhui Univ Sci & Technol, State Key Lab Min Response & Disaster Prevent & C, Huainan 232001, Peoples R China; [Xu, Wensong; Zhao, Guangming; Liu, Chongyan; Meng, Xiangrui; Zhang, Ruofei; Kao, Siming; Huang, Shunjie; Zhou, Jun] Anhui Univ Sci & Technol, Sch Min & Safety Engn, Huaina…	Xu, WS; Zhao, GM; Liu, CY (corresponding author), Anhui Univ Sci & Technol, State Key Lab Min Response & Disaster Prevent & C, Huainan 232001, Peoples R China.; Xu, WS; Zhao, GM; Liu, CY (corresponding author), Anhui Univ Sci & Technol, Sch Min & Safety Engn, Huainan 232001, Peoples R China.	359879021@qq.com; guangmingzhao@163.com; 1578801793@qq.com; xrmeng@aust.edu.cn; 769837656@qq.com; 7898789@qq.com; 839532308@qq.com; zj3333206@163.com; 1013236800@qq.com		xu, wensong/0000-0002-3801-5078	National Key Research and Development Project of China [2017YFC0603003]; National Natural Science Foundation of ChinaNational Natural Science Foundation of China (NSFC) [51804119, 51974009, 51674008]; National Natural Science Youth Fund [52004006]; Key Research and Development Program of Anhui Province [201904a07020010]; Leading Talent Project of Anhui "Special Support Program"; Anhui Provincial …	This work was supported by the National Key Research and Development Project of China (2017YFC0603003), National Natural Science Foundation of China (51804119, 51974009, and 51674008), National Natural Science Youth Fund (52004006), Key Research and Development Program of Anhui Province (201904a07020010), Leading Talent Project of Anhui "Special Support Program", Anhui Provincial Academic and Tec…	Chen B, 2020, ARAB J GEOSCI, V13, DOI 10.1007/s12517-020-05966-8; Chen JT, 2020, PURE APPL GEOPHYS, V177, P5325, DOI 10.1007/s00024-020-02550-9; Diederichs MS, 2004, INT J ROCK MECH MIN, V41, P785, DOI 10.1016/j.ijrmms.2004.02.003; [蒋斌松 JIANG Binsong], 2007, [岩石力学与工程学报, Chinese Journal of Rock Mechanics and Engineering], V26, P982; Kwon S, 2009, TUNN UNDERGR SP TECH, V24, P1, DOI 10.1016/j.tust.2…	23	0	0	4	4	HINDAWI LTD	LONDON	ADAM HOUSE, 3RD FLR, 1 FITZROY SQ, LONDON, W1T 5HF, ENGLAND	1687-8086	1687-8094		ADV CIV ENG	Adv. Civ. Eng.	NOV 25	2020	2020
J	Derda, T; Gwiazda, M; Misiewicz, K; Malkowski, W				Derda, Tomasz; Gwiazda, Mariusz; Misiewicz, Krzysztof; Malkowski, Wieslaw			Marea/Northern Hawwariya in northern Egypt: Integrated results of non-invasive and excavation works	ARCHAEOLOGICAL PROSPECTION			English	Article; Early Access						Byzantine period; Egypt; electrical measurements; kiln; magnetic survey; town planning		Marea/Northern Hawwariya is one of the largest and most important archaeological sites dating between the 3rd century BC and the 8th century AD located at Lake Mareotis in northern Egypt. Even though excavations have been carried out since the end of the 1970s, the settlement is still largely unexplored. To rectify this situation, non-invasive research has been carried out on 21.5 ha of the site …	[Derda, Tomasz; Gwiazda, Mariusz; Misiewicz, Krzysztof; Malkowski, Wieslaw] Univ Warsaw, Fac Archaeol, Krakowskie Przedmiescie 26-28, PL-00970 Warsaw, Poland	Gwiazda, M (corresponding author), Univ Warsaw, Fac Archaeol, Krakowskie Przedmiescie 26-28, PL-00970 Warsaw, Poland.	mariusz.gwiazda@gmail.com		Derda, Tomasz/0000-0002-1419-9650; Misiewicz, Krzysztof/0000-0002-7724-4279; Gwiazda, Mariusz/0000-0002-9984-9375	National Science CentreNational Science Centre, Poland [2017/25/B/H3/01841]; Polish Centre of Mediterranean Archaeology, University of Warsaw	The excavations and non-invasive surveys were financed by the National Science Centre (2017/25/B/H3/01841) and the Polish Centre of Mediterranean Archaeology, University of Warsaw.	Arce I., 2003, P 1 INT C CONSTR HIS, P213; Aspinall A., 1997, ARCHAEOL PROSPECT, V4, P37; Babraj K., 2015, MATERIAYARCHEOLOGICZ, V40, P87; Babraj K., 2008, BIBLIOTEKA MUZEUM AR, V4, P11; Bar-Nathan R., 2011, IAA REPORTS, V48; Bar-Oz G, 2019, P NATL ACAD SCI USA, V116, P8239, DOI 10.1073/pnas.1900233116; Daszewski W. A., 1998, TRAVAUX MAISON LORIE, V27, P229; Derda T., DEV SETTLEMENT N E P, V29.2;…	35	0	0	1	1	WILEY	HOBOKEN	111 RIVER ST, HOBOKEN 07030-5774, NJ USA	1075-2196	1099-0763		ARCHAEOL PROSPECT	Archaeol. Prospect.
J	Cui, GY; Qi, JS; Wang, DY				Cui, Guang-yao; Qi, Jia-suo; Wang, Dao-yuan			Experimental Study on Load Bearing Characteristics of Steel Fiber Reinforced Concrete Lining in the Soft Surrounding Rock Tunnel	ADVANCES IN CIVIL ENGINEERING			English	Article							BEHAVIOR; STRENGTH	Tunnels in soft rock with high ground stress will encounter the problem of large deformation of surrounding rock. The study of new high-performance tunnel lining materials is of great significance to improve the safety of tunnel excavation in soft rock with high ground stress. In this paper, the bearing characteristics of the plain concrete, the reinforced concrete, and the steel fiber reinforced…	[Cui, Guang-yao; Qi, Jia-suo] North China Univ Technol, Sch Civil Engn, Beijing 100144, Peoples R China; [Wang, Dao-yuan] Hebei Jiaotong Vocat & Tech Coll, Dept Civil Engn, Shijiazhuang 050091, Hebei, Peoples R China	Qi, JS (corresponding author), North China Univ Technol, Sch Civil Engn, Beijing 100144, Peoples R China.	cyao456@163.com; qi0530309x@163.com; wtg-888@163.com					[Anonymous], 2010, CECS13; [Anonymous], 2012, GBT501522012; [Anonymous], 2019, GBT501232019; Avanaki MJ, 2018, TUNN UNDERGR SP TECH, V78, P259, DOI 10.1016/j.tust.2018.04.032; [柏建彪 BAI Jianbiao], 2007, [中国矿业大学学报. 自然科学版, Journal of China University of Mining & Technology], V36, P421; Barla G, 2011, TUNN UNDERGR SP TECH, V26, P146, DOI 10.1016/j.tust.2010.08.001; Boulekbache B, 2016, CONSTR BUILD M…	23	1	1	0	0	HINDAWI LTD	LONDON	ADAM HOUSE, 3RD FLR, 1 FITZROY SQ, LONDON, W1T 5HF, ENGLAND	1687-8086	1687-8094		ADV CIV ENG	Adv. Civ. Eng.	NOV 24	2020	2020
J	Liu, K; Qiu, JD				Liu, Kai; Qiu, Jiadong			Investigation of Burn Cut Parameters and Model for One-Step Raise Excavation Based on Damage Evolution Mechanisms	GEOFLUIDS			English	Article							INDUCED STRESS WAVES; NUMERICAL-SIMULATION; FRACTURE PROCESS; TENSILE FAILURE; BRITTLE ROCK; CONCRETE; FRAGMENTATION; OPTIMIZATION; PRESSURE; TUNNELS	One-step raise excavation with burn cut is a kind of technology which use the drilling and blasting method to excavate the raise quickly. Due to the limitation of the free surface in burn cut, determination of cut parameters such as the length of burden and diameters of empty hole and charge hole is important to achieve a good effect of cut blasting. Meanwhile, the choice of the cut model is also…	[Liu, Kai] Guangzhou Univ, Sch Civil Engn, Guangzhou 510006, Guangdong, Peoples R China; [Qiu, Jiadong] Cent South Univ, Minist Educ, Key Lab Metallogen Predict Nonferrous Met & Geol, Changsha, Peoples R China; [Qiu, Jiadong] Shenzhen Univ, Shenzhen Key Lab Deep Underground Engn Sci & Gree, Shenzhen 518060, Peoples R China	Qiu, JD (corresponding author), Cent South Univ, Minist Educ, Key Lab Metallogen Predict Nonferrous Met & Geol, Changsha, Peoples R China.; Qiu, JD (corresponding author), Shenzhen Univ, Shenzhen Key Lab Deep Underground Engn Sci & Gree, Shenzhen 518060, Peoples R China.	lkeason@sina.com; jdq1991@csu.edu.cn			China Postdoctoral Science FoundationChina Postdoctoral Science Foundation [2019M662840]; National Key Research and Development Program of China [2016YFC0600706, 2016YFC0600802]; Open Research Fund Program of Key Laboratory of Metallogenic Prediction of Nonferrous Metals and Geological Environment Monitoring (Central South University), Ministry of Education [2020YSJS13]	The authors gratefully acknowledge the financial support of the China Postdoctoral Science Foundation (2019M662840), the National Key Research and Development Program of China (2016YFC0600706 and 2016YFC0600802) and Funded by the Open Research Fund Program of Key Laboratory of Metallogenic Prediction of Nonferrous Metals and Geological Environment Monitoring (Central South University), Ministry o…	Brannon R. M., 2009, SANDIA NATL LAB, P1; Cho SH, 2004, INT J ROCK MECH MIN, V41, P771, DOI 10.1016/j.ijrmms.2004.02.006; [方秦 Fang Qin], 2014, [工程力学, Engineering Mechanics], V31, P197; Hao H, 2002, ROCK MECH ROCK ENG, V35, P95, DOI 10.1007/s006030200013; Hao H, 2002, ROCK MECH ROCK ENG, V35, P79, DOI 10.1007/s006030200012; Johnson GR, 1992, SHOCK WAVE HIGH STRA, P1075; Jun DAI, 2001, J LIAONING T…	46	0	0	3	3	WILEY-HINDAWI	LONDON	ADAM HOUSE, 3RD FL, 1 FITZROY SQ, LONDON, WIT 5HE, ENGLAND	1468-8115	1468-8123		GEOFLUIDS	Geofluids	NOV 24	2020	2020
J	Zhang, CL; Zhang, Y; Zuo, JP; Gao, SY				Zhang, Chunlei; Zhang, Yong; Zuo, Jianping; Gao, Shouyang			Fracture Pattern of Overlying Strata in Multiple Coal Seam Mining in a Physical Model Vis-a-vis MATLAB Analysis and Geological Radar	MINING METALLURGY & EXPLORATION			English	Article						Coal seam group; Ascending mining; Fracture evolution; Physical simulation	GAS-FLOW; STRESS; MINE; EXTRACTION; NETWORKS; BEHAVIOR; SHEAR; ROCK	To study the fracture evolution of overlying strata for ascending mining in a short-distance coal seam group, a two-dimensional physical simulation model was designed based on a specific geological condition. The fracture development zone was divided into the compaction zone and active zone by monitoring and analyzing the macro fracture evolution of the surrounding rock mass during the excavation…	[Zhang, Chunlei; Zuo, Jianping] China Univ Min & Technol Beijing, Sch Mech & Civil Engn, Beijing 100083, Peoples R China; [Zhang, Chunlei] Huaiyin Inst Technol, Fac Architecture & Civil Engn, Huaian 223001, Jiangsu, Peoples R China; [Zhang, Yong] China Univ Min & Technol Beijing, Sch Energy & Min Engn, Beijing 100083, Peoples R China; [Gao, Shouyang] China Univ Min & Technol, Xuzhou 221008, Jiang…	Zuo, JP (corresponding author), China Univ Min & Technol Beijing, Sch Mech & Civil Engn, Beijing 100083, Peoples R China.	zjp@cumtb.edu.cn		Zhang, Chunlei/0000-0003-3243-2521	State Key Research Development Program of ChinaState Key Development Program for Basic Research of China [2016YFC0600708]; Natural Science Foundation of the Jiangsu Higher Education Institutions of ChinaNational Natural Science Foundation of China (NSFC); National Natural Science Foundation of ChinaNational Natural Science Foundation of China (NSFC) [51804129, 51808246, 51904112]; Foundation of H…	This paper was supported by the State Key Research Development Program of China (Grant No. 2016YFC0600708), the Natural Science Foundation of the Jiangsu Higher Education Institutions of China (Grant Recipient: Chunlei Zhang), the National Natural Science Foundation of China (Project No. 51804129, 51808246, 51904112), the Foundation of Huaiyin Institute of Technology, and the Jiangsu Post-doctora…	[曹玲 Cao Ling], 2014, [长江科学院院报, Journal of Yangtze River Scientific Research Institute], V31, P63; Chen HD, 2013, ROCK MECH ROCK ENG, V46, P1377, DOI 10.1007/s00603-013-0370-2; Chen YF, 2015, WATER RESOUR RES, V51, P2096, DOI 10.1002/2014WR016458; Cheng YP., 2009, J MIN SAF ENG, V26, P127, DOI DOI 10.1016/J.TIV.2014.12.011; Gonzalez RC, 2013, REALIZATION DIGITAL; Huang N, 2019, J HYDROL, V571, P41…	47	1	1	20	20	SPRINGER HEIDELBERG	HEIDELBERG	TIERGARTENSTRASSE 17, D-69121 HEIDELBERG, GERMANY	2524-3462	2524-3470		MINING METALL EXPLOR	Mining Metall. Explor.	APR	2021	38	2
J	Su, Y; Su, YH; Zhao, MH; Vlachopoulos, N				Su, Ya; Su, Yonghua; Zhao, Minghua; Vlachopoulos, Nicholas			Tunnel Stability Analysis in Weak Rocks Using the Convergence Confinement Method	ROCK MECHANICS AND ROCK ENGINEERING			English	Article						Tunnel design; Weak rock; Hoek; Brown yield criterion; Failure mechanisms; Convergence confinement; Radial displacements	GROUND-SUPPORT INTERACTION; RELIABILITY ASSESSMENT; CIRCULAR TUNNELS; EXCAVATION; DISPLACEMENT; MASSES	A support system of weak rock tunnels typically consists of two components, namely an artificial support structure of combined categories and a rock mass surrounding the tunnel. Stability analysis and design methods of the artificial support structure have reached a mature developmental stage, whereas that of the surrounding rock has few progresses, especially when considering the surrounding roc…	[Su, Ya; Su, Yonghua; Zhao, Minghua] Hunan Univ, Coll Civil Engn, Changsha 410082, Peoples R China; [Su, Ya] Queens Univ, Dept Geol Sci & Geol Engn, Kingston, ON K7L 3N6, Canada; [Vlachopoulos, Nicholas] Royal Mil Coll Canada, GeoEngn Ctr Queens RMC, Dept Civil Engn, Kingston, ON K7K 7B4, Canada	Su, Y; Su, YH (corresponding author), Hunan Univ, Coll Civil Engn, Changsha 410082, Peoples R China.; Su, Y (corresponding author), Queens Univ, Dept Geol Sci & Geol Engn, Kingston, ON K7L 3N6, Canada.	suyawork20@163.com; syh5327@hnu.edu.cn			China Scholarship CouncilChina Scholarship Council; National Natural Science Foundation of ChinaNational Natural Science Foundation of China (NSFC) [51878266, 51578232]; RMC Green Team as part of the Canadian Department of National Defence	This work was supported by the China Scholarship Council, the National Natural Science Foundation of China [Grant numbers 51878266 and 51578232] and the RMC Green Team as part of the Canadian Department of National Defence. Dr. Carla Carrapatoso from the Royal Military College of Canada also provided assistance with aspects of this paper.	Barla G, 2019, 3 US ROCK MECH GEOM; Boon CW, 2015, ROCK MECH ROCK ENG, V48, P603, DOI 10.1007/s00603-014-0579-8; Brady B.H.G., 2006, ROCK MECH UNDERGROUN, Vthird, DOI [10.1007/978-1-4020-2116-9, DOI 10.1007/978-1-4020-2116-9]; BROWN ET, 1983, J GEOTECH ENG-ASCE, V109, P15, DOI 10.1061/(ASCE)0733-9410(1983)109:1(15); Carranza-Torres C, 2000, TUNN UNDERGR SP TECH, V15, P187, DOI 10.1016/S0886-7798(…	49	0	0	21	21	SPRINGER WIEN	WIEN	SACHSENPLATZ 4-6, PO BOX 89, A-1201 WIEN, AUSTRIA	0723-2632	1434-453X		ROCK MECH ROCK ENG	Rock Mech. Rock Eng.	FEB	2021	54	2
J	Ma, CD; Li, XB; Chen, JZ; Zhou, YN; Gao, S				Ma, Chunde; Li, Xibing; Chen, Jiangzhan; Zhou, Yanan; Gao, Sen			Geological Core Ground Reorientation Technology Application on In Situ Stress Measurement of an Over-Kilometer-Deep Shaft	ADVANCES IN CIVIL ENGINEERING			English	Article							ANELASTIC STRAIN RECOVERY; ROCKBURST; ORIENTATION; BOREHOLE; FAILURE	As mining progresses to depth, engineering activities face the extreme challenge of high in situ stress. To efficiently measure the deep in situ stress before engineering excavation, an innovative deep in situ stress measurement method capable of the geological core ground reorientation technology and acoustic emission (AE) technology was proposed. With this method, nonorientation geological core…	[Ma, Chunde; Li, Xibing; Chen, Jiangzhan; Zhou, Yanan; Gao, Sen] Cent South Univ, Sch Resources & Safety Engn, Changsha 410083, Hunan, Peoples R China; [Ma, Chunde] Cent South Univ, Ctr Adv Study, Changsha 410083, Hunan, Peoples R China	Chen, JZ (corresponding author), Cent South Univ, Sch Resources & Safety Engn, Changsha 410083, Hunan, Peoples R China.	jiangzhanchen@csu.edu.cn			National Nature Science Foundation of ChinaNational Natural Science Foundation of China (NSFC) [51927808, 52074352]	The work described in this paper was supported by the National Nature Science Foundation of China (Grant nos. 51927808 and 52074352).	[白金朋 Bai Jinpeng], 2013, [岩石力学与工程学报, Chinese Journal of Rock Mechanics and Engineering], V32, P902; Cai MF, 2017, ENGINEERING-PRC, V3, P432, DOI 10.1016/J.ENG.2017.04.027; Cai MF, 2004, J UNIV SCI TECHNOL B, V11, P486; Chen JZ, 2019, J NAT GAS SCI ENG, V69, DOI 10.1016/j.jngse.2019.102928; Christiansson R., 2006, LATEST DEV IN SITU R; Du K, 2020, INT J ROCK MECH MIN, V133, DOI 10.1016/j.ijrmms.20…	31	0	0	9	9	HINDAWI LTD	LONDON	ADAM HOUSE, 3RD FLR, 1 FITZROY SQ, LONDON, W1T 5HF, ENGLAND	1687-8086	1687-8094		ADV CIV ENG	Adv. Civ. Eng.	NOV 21	2020	2020
J	Ren, JX; Chen, X; Chen, XZ; Yun, MC; Cao, XT; Liu, TT				Ren, Jian-Xi; Chen, Xu; Chen, Xing-Zhou; Yun, Meng-Chen; Cao, Xi-TaiLang; Liu, Tian-Tian			Effect of porewater pressure on the mechanical properties of red sandstone with different unloading rates	QUARTERLY JOURNAL OF ENGINEERING GEOLOGY AND HYDROGEOLOGY			English	Article; Early Access							CRACK INITIATION; POISSONS RATIO; DAMAGE; ROCK; FAILURE; BEHAVIOR; STRESS; DILATANCY; VELOCITY; TUNNEL	The red sandstone in the Luohe Formation in Shaanxi Province, China, contains a rich aquifer system. The excavation of coal mines and tunnels through the Luohe Formation affects the mechanical properties of the rocks in the surrounding environment, creating the need to determine the effect of the porewater pressure and unloading rate on the mechanical properties of the red sandstone. Using the co…	[Ren, Jian-Xi; Chen, Xu; Chen, Xing-Zhou; Yun, Meng-Chen; Cao, Xi-TaiLang; Liu, Tian-Tian] Xian Univ Sci & Technol, Sch Architecture & Civil Engn, Xian 710054, Peoples R China	Chen, X (corresponding author), Xian Univ Sci & Technol, Sch Architecture & Civil Engn, Xian 710054, Peoples R China.	xustcx1994@163.com			National Natural Science Foundation of ChinaNational Natural Science Foundation of China (NSFC) [11872299, 51979218]	This project was supported by the National Natural Science Foundation of China (11872299 and 51979218).	Al-Shayea NA, 2004, ENG GEOL, V74, P139, DOI 10.1016/j.enggeo.2004.03.007; [Anonymous], 1979, International Journal of Rock Mechanics and Mining Sciences & Geomechanics Abstracts, V15, P319; Cai M, 2004, INT J ROCK MECH MIN, V41, P833, DOI 10.1016/j.ijrmms.2004.02.001; CARTER JP, 1990, INT J ROCK MECH MIN, V27, P129, DOI 10.1016/0148-9062(90)94861-M; Chai WG, 2011, APPL MECH MATER, V71-78, P1565,…	40	0	0	13	13	GEOLOGICAL SOC PUBL HOUSE	BATH	UNIT 7, BRASSMILL ENTERPRISE CENTRE, BRASSMILL LANE, BATH BA1 3JN, AVON, ENGLAND	1470-9236	2041-4803		Q J ENG GEOL HYDROGE	Q. J. Eng. Geol. Hydrogeol.
J	Zhao, XW; Sun, KG; Xu, WP; Tang, L; Wang, HS; Hong, YQ				Zhao, Xuwei; Sun, Keguo; Xu, Weiping; Tang, Li; Wang, Haisu; Hong, Yiqin			Safety Analysis of Lining Structure Influenced by Blasting of Tunnel with Extralarge Section and Small Space	SHOCK AND VIBRATION			English	Article							INDUCED VIBRATION; EXCAVATION; STABILITY	In order to ensure the safety of the Daling tunnel with extralarge section and small space, the three-dimensional model of blasting dynamic simulation had been established and verified. Then, the model was used to analyze the influence of the surrounding rock characteristics and blasting design parameters on the blasting vibration of the first hole, and the analysis of the sensitivity of each fac…	[Zhao, Xuwei; Sun, Keguo; Xu, Weiping; Tang, Li; Wang, Haisu; Hong, Yiqin] Southwest Jiaotong Univ, Minist Educ, Key Lab Transportat Tunnel Engn, Chengdu 610031, Peoples R China	Sun, KG (corresponding author), Southwest Jiaotong Univ, Minist Educ, Key Lab Transportat Tunnel Engn, Chengdu 610031, Peoples R China.	120132734@qq.com; sunkeg@126.com; 191941305@qq.com; 2519627595@qq.com; 369831595@qq.com; 543263423@qq.com		SUN, KEGUO/0000-0003-2467-9022	National Natural Science Foundation of ChinaNational Natural Science Foundation of China (NSFC) [51678495, 51578463]	This study was funded by the National Natural Science Foundation of China (nos. 51678495 and 51578463).	GAO HJ, 2019, SYMMETRY-BASEL, V11, DOI DOI 10.3390/sym11101228; [龚建伍 GONG Jianwu], 2009, [岩土力学, Rock and Soil Mechanics], V30, P236; [贺鹏 He Peng], 2018, [岩土工程学报, Chinese Journal of Geotechnical Engineering], V40, P1889; [何忠明 He Zhongming], 2019, [中国公路学报, China Journal of Highway and Transport], V32, P143; Hou F., 2017, CHINA CIVIL ENG J, V50, P111; Li LP, 2020, INT J ROCK MECH MIN, V130, DOI 10.1…	28	0	0	9	9	HINDAWI LTD	LONDON	ADAM HOUSE, 3RD FLR, 1 FITZROY SQ, LONDON, W1T 5HF, ENGLAND	1070-9622	1875-9203		SHOCK VIB	Shock Vib.	NOV 18	2020	2020
J	Wang, R; Liu, YY; Deng, XH; Zhang, Y; Huang, XD; Ding, X				Wang, Rui; Liu, Yiyuan; Deng, Xianghui; Zhang, Yu; Huang, Xiaodong; Ding, Xiao			Analysis on Loose Circle of Surrounding Rock of Large Deformation Soft-Rock Tunnel	ADVANCES IN CIVIL ENGINEERING			English	Article							BEHAVIOR; EXCAVATION	With the rapid development of tunnel construction in China, deep buried and long tunnel projects are emerging in areas with complex engineering geological conditions and harsh environment, and thus large deformation of tunnels under conditions of high in situ stress and soft rock becomes increasingly prominent and endangers engineering safety. Therefore, it is of great significance to control the…	[Wang, Rui; Liu, Yiyuan; Deng, Xianghui; Zhang, Yu; Ding, Xiao] Xian Technol Univ, Sch Civil & Architecture Engn, Xian 710021, Peoples R China; [Huang, Xiaodong] Xian Shaanxi Rd & Bridge Grp Co Ltd, Xian 710000, Peoples R China	Deng, XH (corresponding author), Xian Technol Univ, Sch Civil & Architecture Engn, Xian 710021, Peoples R China.	xianghuideng@xatu.edu.cn		deng, xianghui/0000-0001-6996-9758	Natural Science Foundation by the Science and Technology Department of Shaanxi Province [2017JM5136]; Special Scientific Research Program by the Education Department of Shaanxi Province [18JK0402]; Key Research and Development Program by Shaanxi Province [2018SF-391]; Housing and Urban-Rural Construction Foundation by the Housing and Urban-Rural Department of Shaanxi Province [2017-K55]; Science …	This research was financially supported by the Natural Science Foundation (2017JM5136) by the Science and Technology Department of Shaanxi Province, the Special Scientific Research Program (18JK0402) by the Education Department of Shaanxi Province, the Key Research and Development Program (2018SF-391) by Shaanxi Province, the Housing and Urban-Rural Construction Foundation (2017-K55) by the Housi…	Acar MC, 2020, ARAB J GEOSCI, V13, DOI 10.1007/s12517-020-05566-6; Archer S., 2013, P 1 INT C PETR MIN R, V81, P163; Czaja K., 2013, P 75 EUR ASS GEOSC E, P6246; Golebiowski T., 2008, P 14 EUR M ENV ENG G; Hoang D. P., 2015, PAC AS C INF SYST, P1; Huotari-Halkosaari T. K. T., 2016, P NEAR SURF GEOSC 20; Iwata M, 2011, SPR SER GEOMCH GEONG, P211; Kenzo O., 1994, P JAPAN SOC CIVIL EN, V487, P177; K…	32	0	0	11	11	HINDAWI LTD	LONDON	ADAM HOUSE, 3RD FLR, 1 FITZROY SQ, LONDON, W1T 5HF, ENGLAND	1687-8086	1687-8094		ADV CIV ENG	Adv. Civ. Eng.	NOV 17	2020	2020
J	Zhang, SH; Gao, WX; Yan, L; Liu, JC; Liu, LS				Zhang, Shenghui; Gao, Wenxue; Yan, Lei; Liu, Jiangchao; Liu, Liansheng			The characteristics of blasting vibration frequency bands in jointed rock mass slope	ENVIRONMENTAL EARTH SCIENCES			English	Article						Blasting vibration; Peak particle velocity; Frequency; Joints; Vibration attenuation	OPEN-PIT; WAVE-PROPAGATION; INTRINSIC ATTENUATION; SEISMIC-WAVES; PREDICTION; SCATTERING; DAMAGE; SEPARATION; MODEL; MINE	High-slope and rock mass joint development are the factors for predicting and controlling blasting vibrations under open pit mining. Blasting vibration adversely affects the stability of jointed rock slopes, thus studying the characteristics of blasting vibration frequency bands in jointed rock masses slope is an important task to ensure the safety of blasting operations. In the present study, vi…	[Zhang, Shenghui; Gao, Wenxue; Liu, Jiangchao] Beijing Univ Technol, Coll Architecture & Civil Engn, Beijing 100124, Peoples R China; [Yan, Lei; Liu, Liansheng] Jiangxi Univ Sci & Technol, Sch Resource & Environm Engn, Ganzhou 341000, Peoples R China	Liu, LS (corresponding author), Jiangxi Univ Sci & Technol, Sch Resource & Environm Engn, Ganzhou 341000, Peoples R China.	liulsjxust@163.com		Liu, Liansheng/0000-0002-1724-6889; Zhang, Shenghui/0000-0003-2849-4762	National Natural Science Foundation of ChinaNational Natural Science Foundation of China (NSFC) [52064015, 51404111]; National Key R&D Program of China [2018YFF0300205]; Science and Technology Development Plan Project of Beijing Education Commission [KM200710005004]; China Postdoctoral Science FoundationChina Postdoctoral Science Foundation [2014M562529XB]; Jiangxi Provincial Natural Science Foun…	The work was supported by a project funded by the National Natural Science Foundation of China (52064015, 51404111), National Key R&D Program of China (2018YFF0300205), Science and Technology Development Plan Project of Beijing Education Commission (KM200710005004), the China Postdoctoral Science Foundation (2014M562529XB), Jiangxi Provincial Natural Science Foundation (20192BAB206017), a Scienti…	Abdelwahed MF, 2015, SOIL DYN EARTHQ ENG, V69, P93, DOI 10.1016/j.soildyn.2014.10.020; [Anonymous], 2012, REPORT GEOLOGICAL RO; Azizabadi HRM, 2014, COMPUT GEOTECH, V61, P42, DOI 10.1016/j.compgeo.2014.04.008; Bahrani N, 2013, INT J ROCK MECH MIN, V62, P28, DOI 10.1016/j.ijrmms.2013.03.013; Basili M, 2019, ENG STRUCT, V188, P480, DOI 10.1016/j.engstruct.2019.03.030; Cao HX, 2016, FUNDAMENTAL WAVE…	55	0	0	16	16	SPRINGER	NEW YORK	ONE NEW YORK PLAZA, SUITE 4600, NEW YORK, NY, UNITED STATES	1866-6280	1866-6299		ENVIRON EARTH SCI	Environ. Earth Sci.	NOV 16	2020	79	23
J	Li, L; Zhang, F				Li, Lei; Zhang, Feng			Instability Model of a Coal Wall with Large Mining Height under Excavation Unloading Conditions	ADVANCES IN CIVIL ENGINEERING			English	Article								On the basis of the stress field characteristics of surrounding rocks at a coal wall on a working face with a large mining height, the theories of unloading rock mass mechanics and fracture mechanics were used to establish a model of the excavation unloading field effect of the coal wall, and its instability mechanism under the action of unloading stress field was analyzed. Results show that the …	[Li, Lei] Business Div Min Design Tiandi Technol Co Ltd, Beijing 100013, Peoples R China; [Li, Lei] China Coal Res Inst, Min Res Div, Beijing 100013, Peoples R China; [Zhang, Feng] Anhui Univ Sci & Technol, State Key Lab Min Response & Disaster Prevent & C, Huainan 232001, Anhui, Peoples R China; [Zhang, Feng] State Key Lab Water Resource Protect & Utilizat C, Beijing 100120, Peoples R China	Li, L (corresponding author), Business Div Min Design Tiandi Technol Co Ltd, Beijing 100013, Peoples R China.; Li, L (corresponding author), China Coal Res Inst, Min Res Div, Beijing 100013, Peoples R China.	lilei@tdkcsj.com; zhanghl@aust.edu.cn			Open Fund of "State Key Laboratory of Water Resource Protection and Utilization in Coal Mining" [SHJT-17-42.5]	This work was financially supported by the Open Fund of "State Key Laboratory of Water Resource Protection and Utilization in Coal Mining" (SHJT-17-42.5).	Atkinson BK., 1992, FRACTURE MECH ROCK; Gao Q., 2008, CHINA J SUBGRADE ENG, V12, P115; Gao Q., 1996, ENG FRACTURE MECH; Germanovich L. N., 1993, Mechanics of Solids, V28, P116; Hao HJ, 2005, J LIAONING TU, V24, P489; Hu H. L., 2008, STUDY SENSITIVITY ST; Hua XZ., 2008, COAL SCI TECHNOL, V36, P1; Li J.L., 2003, UNLOADING ROCK MASS; Li Y. D., 2005, THEORY APPL FRACTURE; Miao X. X., 1999, J CHINA U …	21	0	0	1	1	HINDAWI LTD	LONDON	ADAM HOUSE, 3RD FLR, 1 FITZROY SQ, LONDON, W1T 5HF, ENGLAND	1687-8086	1687-8094		ADV CIV ENG	Adv. Civ. Eng.	NOV 12	2020	2020
J	Wang, S; Li, LP; Cheng, S				Wang, Sheng; Li, Liping; Cheng, Shuai			Risk assessment of collapse in mountain tunnels and software development	ARABIAN JOURNAL OF GEOSCIENCES			English	Article						Mountain tunnel; Collapse; Risk assessment; Software development; Engineering application	FACE STABILITY ANALYSIS; ANALYTIC HIERARCHY PROCESS; WATER INRUSH; ASSESSMENT METHODOLOGY; CIRCULAR TUNNELS; SHEAR-STRENGTH; CONSTRUCTION; MECHANISM; SYSTEM; FLOOR	As most frequent geological hazard, the collapse is a great threat to safe construction of tunnels. The risk assessment method for collapse in mountain tunnels was presented with six evaluation indices, including surrounding rock level I-1, rock mass integrity I-2, buried depth I-3, bias angle I-4, groundwater I-5, and construction factors I-6. According to the non-linear relationship between the…	[Wang, Sheng; Li, Liping; Cheng, Shuai] Shandong Univ, Geotech & Struct Engn Res Ctr, Jinan 250061, Shandong, Peoples R China; [Wang, Sheng] Yangtze Normal Univ, Sch Civil Engn, Chongqing 408100, Peoples R China	Li, LP (corresponding author), Shandong Univ, Geotech & Struct Engn Res Ctr, Jinan 250061, Shandong, Peoples R China.	liliping@sdu.edu.cn			National Science Fund for Excellent Young Scholars [51722904]; Shandong Provincial Key Research and Development Program (Major Scientific and Technological Innovation Project) [2019JZZY010601, 2019JZZY010428]; Education Commission Science and Technology research project of Chongqing [KJ1712304]; Natural Science Foundation of ChongqingNatural Science Foundation of Chongqing [cstc2019jcyj-msxmX0813…	This work was supported by National Science Fund for Excellent Young Scholars (no. 51722904), the Shandong Provincial Key Research and Development Program (Major Scientific and Technological Innovation Project) (NO. 2019JZZY010601; NO.2019JZZY010428), Education Commission Science and Technology research project of Chongqing (KJ1712304), Natural Science Foundation of Chongqing (cstc2019jcyj-msxmX0…	An Yong-lin, 2011, Journal of Central South University (Science and Technology), V42, P514; [曹文贵 Cao Wengui], 2012, [中国公路学报, China Journal of Highway and Transport], V25, P90; Chen JJ, 2009, ROCK SOIL MECH, V30, P2365; Chen RP, 2013, TUNN UNDERGR SP TECH, V33, P12, DOI 10.1016/j.tust.2012.08.001; Chen W, 2019, ROCK SOIL MECH, V40, P3549, DOI 10.16285/j.rsm.2018.1290; Choi HH, 2004, J CONSTR ENG M…	46	0	0	14	14	SPRINGER HEIDELBERG	HEIDELBERG	TIERGARTENSTRASSE 17, D-69121 HEIDELBERG, GERMANY	1866-7511	1866-7538		ARAB J GEOSCI	Arab. J. Geosci.	NOV 10	2020	13	22
J	Shan, RL; Bai, Y; Ju, Y; Han, TY; Dou, HY; Li, ZL				Shan, Ren-liang; Bai, Yao; Ju, Yang; Han, Tian-yu; Dou, Hao-yu; Li, Zhao-long			Study on the Triaxial Unloading Creep Mechanical Properties and Damage Constitutive Model of Red Sandstone Containing a Single Ice-Filled Flaw	ROCK MECHANICS AND ROCK ENGINEERING			English	Article						Red sandstone; Ice-filled flaw; Triaxial; Unloading creep; Damage constitutive model	LONG-TERM CREEP; BEHAVIOR; ROCK; SALT; ANISOTROPY; TESTS; SHEAR	The freezing method is an effective approach for constructing coal mine shafts through water-rich soft rock strata. The frozen wall produced by this technique stops the movement of water and offers temporary support, ensuring the safety and stability of the shaft working face. However, most frozen rock masses generally comprise ice-filled flaws and frozen intact rock. A frozen fissured rock mass …	[Shan, Ren-liang; Bai, Yao; Ju, Yang; Han, Tian-yu; Dou, Hao-yu; Li, Zhao-long] China Univ Min & Technol Beijing, Sch Mech & Civil Engn, Beijing 100083, Peoples R China; [Ju, Yang] China Univ Min & Technol Beijing, State Key Lab Coal Resources & Safe Min, Beijing 100083, Peoples R China	Bai, Y (corresponding author), China Univ Min & Technol Beijing, Sch Mech & Civil Engn, Beijing 100083, Peoples R China.	bycumtb@126.com	Ju, Yang/I-7954-2013; Bai, Yao/AAE-1702-2021	Ju, Yang/0000-0003-4297-4455; Bai, Yao/0000-0002-9255-5390	National Natural Science Foundation of ChinaNational Natural Science Foundation of China (NSFC) [41572270]; Beijing Municipal Science and Technology CommissionBeijing Municipal Science & Technology Commission [Z161100001116088]	This research was supported by the National Natural Science Foundation of China (Grant No. 41572270) and the Beijing Municipal Science and Technology Commission (Grant No. Z161100001116088). The financial supports are gratefully acknowledged. We are grateful to the anonymous reviewers of this manuscript for their helpful comments.	Andargoli MBE, 2019, B ENG GEOL ENVIRON, V78, P1617, DOI 10.1007/s10064-018-1243-4; Bai Y, 2020, COLD REG SCI TECHNOL, V174, DOI 10.1016/j.coldregions.2020.103061; Bai Y, 2020, COLD REG SCI TECHNOL, V171, DOI 10.1016/j.coldregions.2019.102980; Brantut N, 2013, J STRUCT GEOL, V52, P17, DOI 10.1016/j.jsg.2013.03.007; Cebasek TM, 2018, J ROCK MECH GEOTECH, V10, P151, DOI 10.1016/j.jrmge.2017.11.002;…	38	2	2	49	49	SPRINGER WIEN	WIEN	SACHSENPLATZ 4-6, PO BOX 89, A-1201 WIEN, AUSTRIA	0723-2632	1434-453X		ROCK MECH ROCK ENG	Rock Mech. Rock Eng.	FEB	2021	54	2
J	Chen, JH; Wang, LX; Yao, ZM				Chen, Junhao; Wang, Lexiao; Yao, Zhaoming			Physical and Mechanical Performance of Frozen Rocks and Soil in Different Regions	ADVANCES IN CIVIL ENGINEERING			English	Article							STRENGTH	The artificial freezing method is extensively used in the reinforcement of engineering strata in various regions for shaft excavation and subway connection channels. In this study, representative rock and soil strata from different regions were subjected to low-temperature physical and mechanical performance tests. The results show that, compared with Cretaceous and Jurassic rock and soil strata,…	[Chen, Junhao; Yao, Zhaoming] Fujian Prov Univ, Key Lab Underground Engn, Fuzhou 350118, Peoples R China; [Chen, Junhao; Wang, Lexiao] Fujian Univ Technol, Sch Civil Engn, Fuzhou 350118, Peoples R China; [Yao, Zhaoming] Anhui Univ Sci & Technol, Sch Civil Engn & Architecture, Huainan 232001, Peoples R China	Chen, JH (corresponding author), Fujian Prov Univ, Key Lab Underground Engn, Fuzhou 350118, Peoples R China.; Chen, JH (corresponding author), Fujian Univ Technol, Sch Civil Engn, Fuzhou 350118, Peoples R China.	chjhtougao@163.com; 793710587@qq.com; cxmcxm4163@126.com		chen, junhao/0000-0003-3236-3642	Key Laboratory Open Subject Fund of Fujian University of Underground Engineering [KF-T18014]; Outstanding Young Scientific Research Talents Cultivation Program of Fujian University [GY-Z17070]; Research Development Fund of Fujian Institute of Engineering [GY-Z17158]; Fujian Provincial Natural Science Foundation Projects [2017Y4001]; Fuzhou Science and Technology Bureau [2017-G59, 2018-G-77]	This research was supported by the Key Laboratory Open Subject Fund of Fujian University of Underground Engineering (KF-T18014), the Outstanding Young Scientific Research Talents Cultivation Program of Fujian University (GY-Z17070), the Research Development Fund of Fujian Institute of Engineering (GY-Z17158), the Fujian Provincial Natural Science Foundation Projects (2017Y4001), and the projects …	Cai HB, 2020, J COLD REG ENG, V34, DOI 10.1061/(ASCE)CR.1943-5495.0000204; Chen F. M., 2011, CHINA COAL, V37, P48; Chen X. S., 1998, J CHINA COAL SOC, V23, P55; [黄星 Huang Xing], 2016, [冰川冻土, Journal of Glaciology and Geocryology], V38, P1346; Lanzhou Institute of Glaciology and Cryopedology Chinese Academy of Sciences, 1988, ENG BEH FROZ WALL AR; Liu B, 2019, J EXP CLIN CANC RES, V38, DOI 10.1186…	19	0	0	1	1	HINDAWI LTD	LONDON	ADAM HOUSE, 3RD FLR, 1 FITZROY SQ, LONDON, W1T 5HF, ENGLAND	1687-8086	1687-8094		ADV CIV ENG	Adv. Civ. Eng.	NOV 9	2020	2020
J	Song, DQ; Liu, XL; Chen, Z; Chen, JD; Cai, JH				Song, Danqing; Liu, Xiaoli; Chen, Zhuo; Chen, Jundong; Cai, Jianhua			Influence of Tunnel Excavation on the Stability of a Bedded Rock Slope: A Case Study on the Mountainous Area in Southern Anhui, China	KSCE JOURNAL OF CIVIL ENGINEERING			English	Article						Bedded rock slope; Tunnel excavation; Slope stability analysis; Numerical simulation; Field monitoring	ENGINEERING GEOLOGICAL INVESTIGATIONS; PRELIMINARY SUPPORT DESIGN; HIGHWAY	Tunnel excavation has a substantial effect on the stability of rock slopes. The influence of tunnel excavation on the deformation and mechanical characteristics of a bedded slope is investigated by analysing the cumulative displacement, stress, and strain of the slope using the finite-element method (FEM) and field monitoring method. The deformation characteristics of the surrounding rock of the …	[Song, Danqing; Liu, Xiaoli] Tsinghua Univ, State Key Lab Hydrosci & Engn, Beijing 100084, Peoples R China; [Chen, Zhuo] Sichuan Univ, Dept Geotech Engn, State Key Lab Hydraul & Mt River Engn, Chengdu 610065, Peoples R China; [Chen, Jundong] China Acad Railway Sci Co Ltd, Chengdu 611731, Peoples R China; [Cai, Jianhua] China Railway Southwest Res Inst Co Ltd, Chengdu 611731, Peoples R China	Chen, Z (corresponding author), Sichuan Univ, Dept Geotech Engn, State Key Lab Hydraul & Mt River Engn, Chengdu 610065, Peoples R China.	chenzhuo2@stu.scu.edu.cn	Liu, Xiaoli/AAI-6339-2020		National Postdoctoral Program for Innovative Talent of China [BX20200191]; National Key Research and Development Plan [2018YFC1504801]; National Natural Science Foundation of ChinaNational Natural Science Foundation of China (NSFC) [51479094, 41772246]; Shuimu Tsinghua Scholar Program [2019SM058]	This work is financially supported by the National Postdoctoral Program for Innovative Talent of China (BX20200191), the National Key Research and Development Plan (Grant No. 2018YFC1504801), the National Natural Science Foundation of China (Grant No.51479094, 41772246), and the Shuimu Tsinghua Scholar Program (2019SM058).	Akgun H, 2014, TUNN UNDERGR SP TECH, V40, P277, DOI 10.1016/j.tust.2013.10.018; Chen Z, 2020, LANDSLIDES, V17, P191, DOI 10.1007/s10346-019-01309-1; Du H, 2020, J CLEAN PROD, V270, DOI 10.1016/j.jclepro.2020.122248; Kockar MK, 2003, INT J ROCK MECH MIN, V40, P173, DOI 10.1016/S1365-1609(02)00130-2; Kockar MK, 2003, ENG GEOL, V68, P141, DOI 10.1016/S0013-7952(02)00204-1; Li HB, 2019, B ENG GEOL EN…	26	1	1	19	19	KOREAN SOCIETY OF CIVIL ENGINEERS-KSCE	SEOUL	3-16 JUNGDAE-RO 25-GIL, SONGPA-GU, SEOUL, 05661, SOUTH KOREA	1226-7988	1976-3808		KSCE J CIV ENG	KSCE J. Civ. Eng.	JAN	2021	25	1
J	Wang, F; Cao, P; Zhou, CT; Li, CB; Qiu, JD; Liu, ZZ				Wang, Fei; Cao, Ping; Zhou, Chang-tai; Li, Cun-bao; Qiu, Jia-dong; Liu, Zhi-zhen			Dynamic compression mechanical behavior and damage model of singly-jointed samples	GEOMECHANICS AND GEOPHYSICS FOR GEO-ENERGY AND GEO-RESOURCES			English	Article						Dynamic mechanical parameters; Damage model; Single joint; SHPB test; Damage weight	SPLIT HOPKINSON PRESSURE; CONSTITUTIVE MODEL; FRACTURE-BEHAVIOR; WAVE-PROPAGATION; ROCK FAILURE; BRITTLE ROCK; SIMULATION; TESTS; SANDSTONE; MASS	The dynamic mechanical behavior of jointed rock mass plays a key role in the blasting excavation from mining and tunneling engineering. To investigate the influence of joint parameters (e.g., joint length, joint position and joint type) on the mechanical behavior of singly-jointed samples, dynamic impact compression tests are performed on prefabricated rock-like samples using the Split Hopkinson …	[Wang, Fei; Zhou, Chang-tai; Li, Cun-bao; Qiu, Jia-dong] Shenzhen Univ, Guangdong Prov Key Lab Deep Earth Sci & Geotherma, Coll Civil & Transportat Engn, Inst Deep Earth Sci & Green Energy, Shenzhen, Peoples R China; [Wang, Fei; Cao, Ping; Liu, Zhi-zhen] Cent South Univ, Sch Resources & Safety Engn, Changsha, Peoples R China; [Wang, Fei] Changsha Univ Sci & Technol, Hunan Int Sci & Technol Innova…	Liu, ZZ (corresponding author), Cent South Univ, Sch Resources & Safety Engn, Changsha, Peoples R China.	zzl0217@csu.edu.cn			National Natural Science Foundation of ChinaNational Natural Science Foundation of China (NSFC) [11772358, 51827901]; National Science Foundation for Young Scientists of China [51804203]; Open Fund of Hunan International Scientific and Technological Innovation Cooperation Base of Advanced Construction and Maintenance Technology of Highway (Changsha University of Science Technology) [kfj190804]	This work is financially supported by the National Natural Science Foundation of China (Grant No. 11772358 and 51827901), the National Science Foundation for Young Scientists of China (Grant No. 51804203) and Open Fund of Hunan International Scientific and Technological Innovation Cooperation Base of Advanced Construction and Maintenance Technology of Highway (Changsha University of Science & Tec…	Cai M, 2007, PHYS CHEM EARTH, V32, P907, DOI 10.1016/j.pce.2006.03.007; Cao P, 2015, ENG GEOL, V187, P113, DOI 10.1016/j.enggeo.2014.12.010; Cao RH, 2018, THEOR APPL FRACT MEC, V96, P740, DOI 10.1016/j.tafmec.2017.11.002; Chai SB, 2017, GEOMECH GEOPHYS GEO, V3, P95, DOI 10.1007/s40948-016-0043-1; Dai F, 2010, INT J ROCK MECH MIN, V47, P606, DOI 10.1016/j.ijrmms.2010.04.002; Davarpanah SM, 2020, G…	50	0	0	29	29	SPRINGER HEIDELBERG	HEIDELBERG	TIERGARTENSTRASSE 17, D-69121 HEIDELBERG, GERMANY	2363-8419	2363-8427		GEOMECH GEOPHYS GEO	Geomech. Geophys. Geo-Energy Geo-Resour.	NOV 6	2020	6	4
J	Murlidhar, BR; Bejarbaneh, BY; Armaghani, DJ; Mohammed, AS; Mohamad, ET				Ramesh Murlidhar, Bhatawdekar; Yazdani Bejarbaneh, Behnam; Jahed Armaghani, Danial; Mohammed, Ahmed Salih; Tonnizam Mohamad, Edy			Application of Tree-Based Predictive Models to Forecast Air Overpressure Induced by Mine Blasting	NATURAL RESOURCES RESEARCH			English	Article						Blasting; Air overpressure; Genetic programming; M5&#8242; decision tree; Sensitivity analysis; Parametric analysis; Bloat; Elitism	ARTIFICIAL NEURAL-NETWORK; PARTICLE SWARM OPTIMIZATION; GROUND VIBRATION PREDICTION; AIRBLAST-OVERPRESSURE; INTACT ROCKS; STRENGTH; FLYROCK; MACHINE; ANN; BACKBREAK	In surface mines and underground excavations, every blasting operation can have some destructive environmental impacts, among which air overpressure (AOp) is of major significance. Therefore, it is essential to minimize the related environmental damage by precisely evaluating the intensity of AOp before any blasting operation. The present study primarily aimed to develop two different tree-based …	[Ramesh Murlidhar, Bhatawdekar; Tonnizam Mohamad, Edy] Univ Teknol Malaysia, Fac Engn, Sch Civil Engn, Geotrop Ctr Trop Geoengn, Skudai 81310, Johor, Malaysia; [Yazdani Bejarbaneh, Behnam] Univ Teknol Malaysia, Fac Civil Engn, Dept Geotech & Transportat, Skudai 81310, Johor, Malaysia; [Jahed Armaghani, Danial] Duy Tan Univ, Inst Res & Dev, Da Nang 550000, Vietnam; [Mohammed, Ahmed Salih] Univ Sul…	Bejarbaneh, BY (corresponding author), Univ Teknol Malaysia, Fac Civil Engn, Dept Geotech & Transportat, Skudai 81310, Johor, Malaysia.; Armaghani, DJ (corresponding author), Duy Tan Univ, Inst Res & Dev, Da Nang 550000, Vietnam.	ybbehnam2@live.utm.my; danialjahedarmaghani@duytan.edu.vn	Bejarbaneh, Behnam Yazdani/AAF-2764-2020	Bejarbaneh, Behnam Yazdani/0000-0002-8170-6296			Abolfathi S, 2016, OCEAN ENG, V112, P76, DOI 10.1016/j.oceaneng.2015.12.016; [Anonymous], 1992, INT J ROCK MECH MIN, V29, P145; Armaghani DJ, 2014, ARAB J GEOSCI, V7, P5383, DOI 10.1007/s12517-013-1174-0; Armaghani DJ, 2020, B ENG GEOL ENVIRON, V79, P4369, DOI 10.1007/s10064-020-01834-7; Armaghani DJ, 2020, SUSTAINABILITY-BASEL, V12, DOI 10.3390/su12062229; Armaghani DJ, 2019, J ROCK MECH GEOTECH…	103	2	2	5	5	SPRINGER	DORDRECHT	VAN GODEWIJCKSTRAAT 30, 3311 GZ DORDRECHT, NETHERLANDS	1520-7439	1573-8981		NAT RESOUR RES	Nat. Resour. Res.	APR	2021	30	2
J	Peng, R; Ouyang, ZH; Zhao, QF; Zhu, JM				Peng, Rui; Ouyang, Zhenhua; Zhao, Qifeng; Zhu, Jianming			Studies on support techniques for roadway bearing structure features under different geo-pressures	ARABIAN JOURNAL OF GEOSCIENCES			English	Article						Bearing structure; Ground pressure; Multi-echelon support	ROCK	This study investigates the timely support and multi-echelon support in relation to the structure partition of the surrounding rock. The instability behavior of the roadway bearing structure for different working depths and ground pressures is studied and the impact of the supports on the stability of the roadway is analyzed. Considering the distribution of the secondary stress field and the degr…	[Peng, Rui; Ouyang, Zhenhua; Zhao, Qifeng; Zhu, Jianming] North China Inst Sci & Technol, Sch Emergency Technol & Management, Beijing 101601, Peoples R China	Peng, R (corresponding author), North China Inst Sci & Technol, Sch Emergency Technol & Management, Beijing 101601, Peoples R China.	pengrui232001@163.com			National Natural Science Foundation of ChinaNational Natural Science Foundation of China (NSFC) [51804119, 51874002, 51774012, 51974125, 51674119]; Fundamental Research Funds for the Central UniversitiesFundamental Research Funds for the Central Universities [3142017087, 3142018001, 3142018024]	This research has been financed by the National Natural Science Foundation of China (Grant Nos. 51804119, 51874002, 51774012, 51974125, 51674119). This research is supported by the Fundamental Research Funds for the Central Universities (3142017087, 3142018001, 3142018024).	[柏建彪 BAI Jianbiao], 2007, [中国矿业大学学报. 自然科学版, Journal of China University of Mining & Technology], V36, P421; Cheng B, 2013, COAL ENG, V45, P35; Cheng YP, 2003, MINE PRESS ROOF MANA, V02, P56; DETOURNAY E, 1986, ROCK MECH ROCK ENG, V19, P99, DOI 10.1007/BF01042527; Dias D, 2011, TUNN UNDERGR SP TECH, V26, P517, DOI 10.1016/j.tust.2011.03.004; Don F.T, 2000, SUPPORT THEORY APPL, P35; Dong FT, 1991, …	31	1	1	11	11	SPRINGER HEIDELBERG	HEIDELBERG	TIERGARTENSTRASSE 17, D-69121 HEIDELBERG, GERMANY	1866-7511	1866-7538		ARAB J GEOSCI	Arab. J. Geosci.	NOV 5	2020	13	22
J	Zhu, L; He, SM; Jian, JH; Zhou, J; Liu, B				Zhu, Lei; He, Siming; Jian, Jihao; Zhou, Jun; Liu, Bin			Geological structure and failure mechanism of an excavation-induced rockslide on the Tibetan Plateau, China	BULLETIN OF ENGINEERING GEOLOGY AND THE ENVIRONMENT			English	Article						Rockslide; Excavation; Failure mechanism; Tibetan Plateau		Rock slope failures are controlled by a complex interplay of geological structures and anthropogenic activities. In this study, data from structural geology, rock mass characterization, and ground-based monitoring networks are integrated into a numerical model. This model is used to explore the relationships among structural features, damages, anthropogenic activities, and slope failures occurrin…	[Zhu, Lei; He, Siming; Jian, Jihao] Chinese Acad Sci, Inst Mt Hazards & Environm, Key Lab Mt Hazards & Surface Proc, Chengdu 610041, Peoples R China; [He, Siming] Chinese Acad Sci, Ctr Excellence Tibetan Plateau Earth Sci, Beijing 100101, Peoples R China; [He, Siming; Jian, Jihao] Univ Chinese Acad Sci, Beijing 100049, Peoples R China; [Zhou, Jun; Liu, Bin] China 19th Met Corp, Chengdu 610031, Pe…	He, SM (corresponding author), Chinese Acad Sci, Inst Mt Hazards & Environm, Key Lab Mt Hazards & Surface Proc, Chengdu 610041, Peoples R China.; He, SM (corresponding author), Chinese Acad Sci, Ctr Excellence Tibetan Plateau Earth Sci, Beijing 100101, Peoples R China.; He, SM (corresponding author), Univ Chinese Acad Sci, Beijing 100049, Peoples R China.	hsm@imde.ac.cn			National Key R&D Program of China [2018YFC1505003, 2017YFC1501003]; National Natural Science Foundation of ChinaNational Natural Science Foundation of China (NSFC) [41772312]; Major Program of the National Natural Science Foundation of ChinaNational Natural Science Foundation of China (NSFC) [41790433]; CAS "Light of West China" Program	This work was supported by National Key R&D Program of China (Grant 2018YFC1505003 and 2017YFC1501003), the National Natural Science Foundation of China (Grant 41772312), the Major Program of the National Natural Science Foundation of China (Grant No. 41790433), and the CAS "Light of West China" Program.	Agliardi F, 2009, TECTONOPHYSICS, V474, P250, DOI 10.1016/j.tecto.2009.02.019; Bazalgette L, 2010, STRUCT GEOL; Bois T, 2012, TECTONOPHYSICS, V526, P147, DOI 10.1016/j.tecto.2011.08.001; Brideau MA, 2005, ENG GEOL, V80, P242, DOI 10.1016/j.enggeo.2005.05.004; Brideau MA, 2009, GEOMORPHOLOGY, V103, P30, DOI 10.1016/j.geomorph.2008.04.010; Cui S, 2017, LANDSLIDES; ENGELDER T, 1980, J GEOPHYS RES, V…	28	0	0	12	12	SPRINGER HEIDELBERG	HEIDELBERG	TIERGARTENSTRASSE 17, D-69121 HEIDELBERG, GERMANY	1435-9529	1435-9537		B ENG GEOL ENVIRON	Bull. Eng. Geol. Environ.	FEB	2021	80	2
J	Si, XF; Huang, LQ; Li, XB; Ma, CD; Gong, FQ				Si, Xuefeng; Huang, Linqi; Li, Xibing; Ma, Chunde; Gong, Fengqiang			Experimental Investigation of Spalling Failure of D-Shaped Tunnel Under Three-Dimensional High-Stress Conditions in Hard Rock	ROCK MECHANICS AND ROCK ENGINEERING			English	Article; Early Access						Deep D-shaped tunnel; Spalling failure; True-triaxial test; Three-dimensional high-stress; V-shaped notch	CANADIAN GEOTECHNICAL COLLOQUIUM; INTERMEDIATE PRINCIPAL STRESS; IN-SITU OBSERVATION; EXPERIMENTAL SIMULATION; ROCKBURST PROCESS; EXCAVATION; STRENGTH; FRACTURE; CONSTRUCTION; MECHANISM	The D-shaped cross section is a commonly used tunnel cross section in underground engineering. To simulate the failure process of a D-shaped hole under deep three-dimensional (3D) high-stress conditions, true-triaxial tests were conducted on cubic granite specimens with a through D-shaped hole, and the failure process of the hole sidewall was recorded in real time. Results show that the spalling …	[Si, Xuefeng; Huang, Linqi; Li, Xibing; Ma, Chunde; Gong, Fengqiang] Cent South Univ, Sch Resources & Safety Engn, Changsha 410083, Hunan, Peoples R China; [Gong, Fengqiang] Southeast Univ, Sch Civil Engn, Nanjing 211189, Peoples R China	Huang, LQ (corresponding author), Cent South Univ, Sch Resources & Safety Engn, Changsha 410083, Hunan, Peoples R China.	huanglinqi@csu.edu.cn			National Natural Science Foundation of ChinaNational Natural Science Foundation of China (NSFC) [41630642, 51904335]; Fundamental Research Funds for the Central Universities of Central South University [2019zzts310]	This work was supported by the National Natural Science Foundation of China (Grant No. 41630642 and 51904335), and the Fundamental Research Funds for the Central Universities of Central South University (Grant No. 2019zzts310).	Bobet A, 1998, INT J ROCK MECH MIN, V35, P863, DOI 10.1016/S0148-9062(98)00005-9; BROWN ET, 1978, INT J ROCK MECH MIN, V15, P211, DOI 10.1016/0148-9062(78)91227-5; Cai M, 2008, INT J ROCK MECH MIN, V45, P763, DOI 10.1016/j.ijrmms.2007.07.026; Cai M, 1998, PURE APPL GEOPHYS, V153, P67, DOI 10.1007/s000240050185; Cheon D.S., 2006, TUNN UNDERGR SP TECH, V21, P448, DOI [10.1016/j.tust.2005.12.087, DO…	54	2	2	65	65	SPRINGER WIEN	WIEN	SACHSENPLATZ 4-6, PO BOX 89, A-1201 WIEN, AUSTRIA	0723-2632	1434-453X		ROCK MECH ROCK ENG	Rock Mech. Rock Eng.
J	Chen, C; Liu, LP; Cong, Y				Chen, Chen; Liu, Lipeng; Cong, Yu			Experimental Investigation on Deformation and Strength Behavior of Marble with the Complex Loading-Unloading Stress Path	ADVANCES IN CIVIL ENGINEERING			English	Article							ENERGY; FAILURE; ROCK; TESTS	The excavation of deep tunnel in rock mass undergoes complex loading and unloading stress paths, resulting in rib spalling, flaking, and even severe rockburst disasters. Based on the variation law of the stress path of the surrounding rock, laboratory tests of rock mechanics are designed, and the deformation and strength behavior of marble with different initial confining pressure and unloading r…	[Chen, Chen] China Univ Geosci Beijing, Sch Engn & Technol, Beijing 100083, Peoples R China; [Chen, Chen; Liu, Lipeng] State Key Lab Simulat & Regulat Water Cycle River, Beijing 100048, Peoples R China; [Cong, Yu] Qingdao Univ Technol, Sch Civil Engn, Qingdao 266033, Peoples R China	Liu, LP (corresponding author), State Key Lab Simulat & Regulat Water Cycle River, Beijing 100048, Peoples R China.	c119h220@163.com; liulip@iwhr.com; cuncin@163.com			National Nature Science Foundation of ChinaNational Natural Science Foundation of China (NSFC) [51609266, 51879284]	This work was supported by the National Nature Science Foundation of China (Nos. 51609266 and 51879284).	Al-Ajmi AM, 2005, INT J ROCK MECH MIN, V42, P431, DOI 10.1016/j.ijrmms.2004.11.004; GAO YF, 1993, CHIN J GEOTECH ENG, V15, P26; Gaziev E, 2001, INT J SOLIDS STRUCT, V38, P7681, DOI 10.1016/S0020-7683(01)00037-3; Gong FQ, 2018, TUNN UNDERGR SP TECH, V81, P413, DOI 10.1016/j.tust.2018.07.035; Gong FQ, 2019, ROCK MECH ROCK ENG, V52, P4237, DOI 10.1007/s00603-019-01842-4; Guo JH, 2017, J I BREWING, V…	34	0	0	3	3	HINDAWI LTD	LONDON	ADAM HOUSE, 3RD FLR, 1 FITZROY SQ, LONDON, W1T 5HF, ENGLAND	1687-8086	1687-8094		ADV CIV ENG	Adv. Civ. Eng.	NOV 4	2020	2020
J	Khanna, R; Dubey, RK				Khanna, Rahul; Dubey, R. K.			Comparative assessment of slope stability along road-cuts through rock slope classification systems in Kullu Himalayas, Himachal Pradesh, India	BULLETIN OF ENGINEERING GEOLOGY AND THE ENVIRONMENT			English	Article						Slope stability; Rock mass classification; Slope mass rating (SMR); Slope stability rating (SSR); Q-slope; Kinematic analysis; Kullu Himalayas (India)	MASS RATING SMR; STRENGTH; GSI; PARAMETERS; DESIGN	Evaluation of stability of artificial slopes created due to road construction in the mountainous terrain is very important but often a neglected aspect. The safe execution of road-cut slopes depends upon the level of understanding achieved in defining the engineering behaviour of rock masses with respect to its deformation and mechanical attributes. Understanding the realistic response of the roc…	[Khanna, Rahul; Dubey, R. K.] Indian Sch Mines, Indian Inst Technol, Dhanbad, Bihar, India; [Khanna, Rahul] NHPC, Faridabad, India	Dubey, RK (corresponding author), Indian Sch Mines, Indian Inst Technol, Dhanbad, Bihar, India.	rahulgeo05@gmail.com; rkdubey1085@hotmail.com			Ministry of Earth Science (MoES)Ministry of Earth Science (MoES), Government of India [115/IFD/15]; DAE-BRNS, Mumbai, IndiaDepartment of Atomic Energy (DAE)Board of Research in Nuclear Sciences (BRNS) [2013/36/56-BRNS/2447]	The study was supported by the Ministry of Earth Science under the Project (MoES No. 115/IFD/15) and DAE-BRNS, Mumbai, India (File No. 2013/36/56-BRNS/2447), for landslide study in Himalayan region and strength of rocks.	Anbalagan Sharma, 1992, P 6 NAT S ROCK MECH, P258; Bar N, 2017, ROCK MECH ROCK ENG, V50, P3307, DOI 10.1007/s00603-017-1305-0; Barton MD, 2010, SMART SCIENCE FOR EXPLORATION AND MINING, VOL 1 AND 2, P5; Barton N., 1974, ROCK MECH, V6, P189, DOI [DOI 10.1007/BF01239496, 10.1007/bf01239496]; Barton NR, 2015, FUTURE DEV ROCK MECH, P157; Basahel H, 2017, J ROCK MECH GEOTECH, V9, P993, DOI 10.1016/j.j…	42	0	0	9	9	SPRINGER HEIDELBERG	HEIDELBERG	TIERGARTENSTRASSE 17, D-69121 HEIDELBERG, GERMANY	1435-9529	1435-9537		B ENG GEOL ENVIRON	Bull. Eng. Geol. Environ.	FEB	2021	80	2
J	Fan, Y; Cui, XZ; Leng, ZD; Zhou, YR; Zheng, JW; Wang, F				Fan, Yong; Cui, Xianze; Leng, Zhendong; Zhou, Yurong; Zheng, Junwei; Wang, Feng			Development of a Model to Predict Vibrations Induced by Blasting Excavation of Deep Rock Masses under High In Situ Stress	SHOCK AND VIBRATION			English	Article							RELEASE	During the process of blasting excavation of deep rock masses under high in situ stress, energy produced by the explosive and the strain energy released by rock mass excavation constitute the energy source of vibration. However, in traditional Sadov's empirical formula, the energy produced by explosive explosion is only considered which makes the error higher when it is used to predict the blasti…	[Fan, Yong; Cui, Xianze; Leng, Zhendong; Zhou, Yurong; Zheng, Junwei; Wang, Feng] China Three Gorges Univ, Hubei Key Lab Construct & Management Hydropower E, Yichang 443002, Peoples R China; [Fan, Yong] Wuhan Univ, Key Lab Rock Mech Hydraul Struct Engn, Minist Educ, Wuhan 430072, Hubei, Peoples R China; [Leng, Zhendong] China Gezhouba Grp Explos Co Ltd, Chongqing 401121, Peoples R China	Zheng, JW (corresponding author), China Three Gorges Univ, Hubei Key Lab Construct & Management Hydropower E, Yichang 443002, Peoples R China.	jjunweizheng@163.com			National Natural Science Foundation of ChinaNational Natural Science Foundation of China (NSFC) [51979152]; Educational Commission of Hubei Province of China [T2020005]; Open Foundation of Hydraulic Rock Mechanics of Ministry of Education [RMHSE1603]; Open Foundation of Hubei Key Laboratory of Construction and Management in Hydropower Engineering [2016KSD11]	This work was supported by the National Natural Science Foundation of China (51979152), Educational Commission of Hubei Province of China (T2020005), Open Foundation of Hydraulic Rock Mechanics of Ministry of Education (RMHSE1603), and Open Foundation of Hubei Key Laboratory of Construction and Management in Hydropower Engineering (2016KSD11). The authors would like to thank all the supporters.	Cardu M, 2019, INT J MIN SCI TECHNO, V29, P905, DOI 10.1016/j.ijmst.2019.02.009; Dehghani H, 2011, INT J ROCK MECH MIN, V48, P51, DOI 10.1016/j.ijrmms.2010.08.005; Guozhong H., 2006, ROCK SOIL MECH S, VS2, P1036; [何满潮 He Miannchao], 2005, [岩石力学与工程学报, Chinese Journal of Rock Mechanics and Engineering], V24, P2803; Kamali M, 2011, J VIB CONTROL, V17, P541, DOI 10.1177/1077546310370985; Khandelwal M…	28	0	0	5	5	HINDAWI LTD	LONDON	ADAM HOUSE, 3RD FLR, 1 FITZROY SQ, LONDON, W1T 5HF, ENGLAND	1070-9622	1875-9203		SHOCK VIB	Shock Vib.	NOV 2	2020	2020
J	Khadim, FK; Dokou, Z; Lazin, R; Moges, S; Bagtzoglou, AC; Anagnostou, E				Khadim, Fahad Khan; Dokou, Zoi; Lazin, Rehenuma; Moges, Semu; Bagtzoglou, Amvrossios C.; Anagnostou, Emmanouil			Groundwater modeling in data scarce aquifers: The case of Gilgel-Abay, Upper Blue Nile, Ethiopia	JOURNAL OF HYDROLOGY			English	Article						Groundwater model; MODFLOW-NWT; Gilgel-Abay; Upper Blue Nile; Lake Tana; Citizen science	LAKE TANA BASIN; ROCK UNDERGROUND EXCAVATIONS; RECHARGE RATE ESTIMATION; PERCHED WATER BODIES; HYDROLOGIC CONSTRAINTS; ARID ENVIRONMENTS; RIVER-BASIN; BALANCE; FLOW; CLIMATE	Groundwater (GW) is the main source of domestic water supply in Ethiopia (85%), however, despite widespread acknowledgement of its potential for resource-based development and climate change adaptation, the sector is still quite under-investigated. This is mainly due to the scarcity of in situ data, which are essential to building robust impact models. To address this, we developed a fine-resolut…	[Khadim, Fahad Khan; Lazin, Rehenuma; Moges, Semu; Bagtzoglou, Amvrossios C.; Anagnostou, Emmanouil] Univ Connecticut, Dept Civil & Environm Engn, Storrs, CT 06269 USA; [Dokou, Zoi] Calif State Univ Sacramento, Dept Civil Engn, 6000 J St, Sacramento, CA 95819 USA	Dokou, Z (corresponding author), Calif State Univ Sacramento, Dept Civil Engn, 6000 J St, Sacramento, CA 95819 USA.	zoi.dokou@csus.edu		Dokou, Zoi/0000-0003-0879-3423; Khadim, Fahad Khan/0000-0002-0899-3540	National Science FoundationNational Science Foundation (NSF) [1545874]; Abay Basin Authority (ABA) -Ethiopia; Bahir Dar University (BU) -Ethiopia; Ministry of Water, Irrigation, and Energy-Ethiopia	This research is based upon work supported by the National Science Foundation under Grant No. 1545874. The authors would like to thank all the supporting agencies, e.g. Abay Basin Authority (ABA) -Ethiopia, Bahir Dar University (BU) -Ethiopia, and the Ministry of Water, Irrigation, and Energy-Ethiopia for their continuous support during the completion of this research. In particular, we would lik…	Abiy AZ, 2016, SPRING GEOGR, P463, DOI 10.1007/978-3-319-18787-7_22; Arsenault KR, 2020, B AM METEOROL SOC, V101, pE1007, DOI 10.1175/BAMS-D-18-0264.1; Asfaw B., 2003, REGIONAL HYDROGEOLOG; Asrie NA, 2016, J AGRIC ENVIRON INT, V110, P5, DOI 10.12895/jaeid.20161.380; Awulachew S.B., 2008, REV HYDROLOGY SEDIME; Aydin A, 2000, MAR PETROL GEOL, V17, P797, DOI 10.1016/S0264-8172(00)00020-9; Ayenew T, …	87	2	2	1	1	ELSEVIER	AMSTERDAM	RADARWEG 29, 1043 NX AMSTERDAM, NETHERLANDS	0022-1694	1879-2707		J HYDROL	J. Hydrol.	NOV	2020	590
J	Chudy, K; Worsa-Kozak, M; Wojcik, A				Chudy, Krzysztof; Worsa-Kozak, Magdalena; Wojcik, Agnieszka			Groundwater Chemistry and Stratification in the Flooded Hard-Coal Mine Shaft "Nowy I" (Nowa Ruda Region, SW Poland)	WATER			English	Article						abandoned mines; mine water; underground mining; hydrogeology; geochemistry	GEOTHERMAL-ENERGY RECOVERY; WATER-POLLUTION; BASIN; EVOLUTION; CLOSURE	The flooding of unprofitable underground mines is one of the methods of their closure. After the drainage of the mine has stopped, the voids left in the rock mass as a result of mining, are filled with inflowing groundwater. In this way, reservoirs of groundwater with specific physicochemical parameters are formed. These parameters depend on the interaction of the water flowing into the workings …	[Chudy, Krzysztof; Worsa-Kozak, Magdalena; Wojcik, Agnieszka] Wroclaw Univ Sci & Technol, Fac Geoengn Min & Geol, Wybrzeze Wyspianskiego 27, PL-50370 Wroclaw, Poland	Worsa-Kozak, M (corresponding author), Wroclaw Univ Sci & Technol, Fac Geoengn Min & Geol, Wybrzeze Wyspianskiego 27, PL-50370 Wroclaw, Poland.	krzysztof.chudy@pwr.edu.pl; magdalena.worsa-kozak@pwr.edu.pl; a.wojcik@pwr.edu.pl	; Worsa-Kozak, Magdalena/L-3227-2015	Chudy, Krzysztof/0000-0001-8784-4852; Worsa-Kozak, Magdalena/0000-0001-8119-3075; Wojcik, Agnieszka/0000-0003-2945-4519	Polish Ministry of Science and Higher EducationMinistry of Science and Higher Education, Poland [N520 060 31/2300]	The research work was partially founded by Polish Ministry of Science and Higher Education (as grant N520 060 31/2300) and co-founded with the research subsidy of the Polish Ministry of Science and Higher Education granted for Wroclaw University of Science and Technology for 2020.	Alvarez R, 2016, J ENVIRON MANAGE, V184, P219, DOI 10.1016/j.jenvman.2016.09.072; Augustyniak K., 1970, ATLAS GEOLOGICZNY DO; Banks D, 1997, ENVIRON GEOL, V32, P157, DOI 10.1007/s002540050204; Banks D, 2010, HYDROGEOL J, V18, P519, DOI 10.1007/s10040-009-0534-z; Bao T, 2019, ENERG CONVERS MANAGE, V199, DOI 10.1016/j.enconman.2019.111956; Bao T, 2019, ENERG CONVERS MANAGE, V183, P604, DOI 10.1016/…	57	1	1	3	3	MDPI	BASEL	ST ALBAN-ANLAGE 66, CH-4052 BASEL, SWITZERLAND		2073-4441		WATER-SUI	Water	NOV	2020	12	11
J	Lu, J; Yin, GZ; Zhang, DM; Gao, H; Li, CB; Li, MH				Lu, Jun; Yin, Guangzhi; Zhang, Dongming; Gao, Heng; Li, Cunbao; Li, Minghui			True triaxial strength and failure characteristics of cubic coal and sandstone under different loading paths	INTERNATIONAL JOURNAL OF ROCK MECHANICS AND MINING SCIENCES			English	Article						Intermediate principal stress; True-triaxial tests; Deformation; Strength; Failure mode; Bedding coal	STRESS-DISTRIBUTION CHARACTERISTICS; CRACK INITIATION STRESS; MECHANICAL-BEHAVIOR; ACOUSTIC EMISSIONS; PERMEABILITY; DEFORMATION; ROCK; EVOLUTION; APPARATUS; FRACTURE	In deep underground coal mining, engineering activities are performed within anisotropic in-situ stress fields due to engineering disturbances and tectonic stress. Many such activities involve the development of excavations in soft rock and anisotropic coal. Accordingly, studying the mechanical properties of soft rocks is important for the stability of deep underground excavations. In this study,…	[Lu, Jun; Li, Cunbao; Li, Minghui] Shenzhen Univ, Coll Civil & Transportat Engn, Inst Deep Earth Sci & Green Energy, Guangdong Prov Key Lab Deep Earth Sci & Geotherma, Shenzhen 518060, Peoples R China; [Lu, Jun; Yin, Guangzhi; Zhang, Dongming; Gao, Heng] Chongqing Univ, State Key Lab Coal Mine Disaster Dynam & Control, Chongqing 400030, Peoples R China; [Lu, Jun; Yin, Guangzhi; Zhang, Dongming; G…	Lu, J; Li, CB; Li, MH (corresponding author), Shenzhen Univ, Coll Civil & Transportat Engn, Inst Deep Earth Sci & Green Energy, Guangdong Prov Key Lab Deep Earth Sci & Geotherma, Shenzhen 518060, Peoples R China.	junlu@cqu.edu.cn; cunbao.li@szu.edu.cn; mhli@szu.edu.cn		Lu, Jun/0000-0002-3482-5049	National Natural Science Foundation of ChinaNational Natural Science Foundation of China (NSFC) [51874053, 51674049, 51434003, 51804203]; Department of Science and Technology of Guangdong Province [2019ZT08G315]	This study was financially supported by the National Natural Science Foundation of China (Grant. Nos 51874053, 51674049, and 51434003, 51804203). Department of Science and Technology of Guangdong Province (2019ZT08G315). The authors thanks for the careful guidance to their supervisor Professor Guangzhi Yin, who passed away in June 2019.	Akdag S, 2018, ROCK MECH ROCK ENG, V51, P1657, DOI 10.1007/s00603-018-1415-3; Alejano LR, 2012, ROCK MECH ROCK ENG, V45, P995, DOI 10.1007/s00603-012-0278-2; Chang C, 2000, J GEOPHYS RES-SOL EA, V105, P18999, DOI 10.1029/2000JB900184; Chao JK, 2019, ROCK MECH ROCK ENG, V52, P2803, DOI 10.1007/s00603-019-01873-x; Chen SD, 2017, INT J COAL GEOL, V182, P66, DOI 10.1016/j.coal.2017.09.009; Colmenares…	55	3	3	30	30	PERGAMON-ELSEVIER SCIENCE LTD	OXFORD	THE BOULEVARD, LANGFORD LANE, KIDLINGTON, OXFORD OX5 1GB, ENGLAND	1365-1609	1873-4545		INT J ROCK MECH MIN	Int. J. Rock Mech. Min. Sci.	NOV	2020	135
J	Zhao, QH; Zhao, XB; Zheng, YL; Li, JC; He, L; He, JL; Zou, CJ				Zhao, Q. H.; Zhao, X. B.; Zheng, Y. L.; Li, J. C.; He, L.; He, J. L.; Zou, C. J.			Heating characteristics of igneous rock-forming minerals under microwave irradiation	INTERNATIONAL JOURNAL OF ROCK MECHANICS AND MINING SCIENCES			English	Article						Igneous rock-forming minerals; Microwave irradiation; Heating characteristics; Microwave sensitivity		Microwave-assisted mechanical excavation has been considered as a promising rock breakage method and is widely studied in recent years. Heating characteristics of minerals are the basis of research on the weakening effect of microwave irradiation on rock. In this paper, 14 igneous rock-forming minerals were microwave heated. The influences of microwave power, mineral group/sub-group, element cont…	[Zhao, Q. H.; Zhao, X. B.; He, J. L.] Nanjing Univ, Sch Earth Sci & Engn, Nanjing 210023, Peoples R China; [Zheng, Y. L.; Li, J. C.; He, L.] Southeast Univ, Sch Civil Engn, Nanjing 211189, Peoples R China; [Zou, C. J.] Monash Univ, Dept Civil Engn, Clayton, Vic 3800, Australia	Zhao, XB (corresponding author), Nanjing Univ, Sch Earth Sci & Engn, Nanjing 210023, Peoples R China.	xbzhao@nju.edu.cn	Zheng, Yanlong/AAJ-6554-2021		National Natural Science Foundation of ChinaNational Natural Science Foundation of China (NSFC) [41831281, 41372266]; Postgraduate Research & Practice Innovation Program of Jiangsu Province [SJCX20_0006]	This study was funded by the National Natural Science Foundation of China (Grant No. 41831281, 41372266) and Postgraduate Research & Practice Innovation Program of Jiangsu Province (Grant No. SJCX20_0006).	Bell FG, 2004, ENG GEOLOGY CONSTRUC; CHEN TT, 1984, CAN METALL QUART, V23, P349; Cheng KG, 1997, J NON-CRYST SOLIDS, V215, P134, DOI 10.1016/S0022-3093(97)00084-7; Church RH, 1988, DIELECTRIC PROPERTIE; Ford J.D., 1967, J MICROWAVE POWER EE, V2, P61; Harrison CP, 1997, THESIS; Hartlieb P., 2017, BHM BERGUND HOTTENMA, V162, P77, DOI DOI 10.1007/S00501-016-0569-0; Hassani F, 2016, J ROCK MECH GEOTE…	30	0	0	7	7	PERGAMON-ELSEVIER SCIENCE LTD	OXFORD	THE BOULEVARD, LANGFORD LANE, KIDLINGTON, OXFORD OX5 1GB, ENGLAND	1365-1609	1873-4545		INT J ROCK MECH MIN	Int. J. Rock Mech. Min. Sci.	NOV	2020	135
J	Zheng, HG; Cai, QX; Zhou, W; Lu, X; Li, M; Qi, CC; Jiskani, IM; Zhang, Y				Zheng, Huaiguo; Cai, Qingxiang; Zhou, Wei; Lu, Xiang; Li, Ming; Qi, Chongchong; Jiskani, Izhar Mithal; Zhang, Yu			Creep Behaviours of Argillaceous Sandstone: An Experimental and Modelling Study	APPLIED SCIENCES-BASEL			English	Article						creep behaviour; argillaceous sandstone; confining pressures; nonlinear creep numerical model	CONSTITUTIVE MODEL; ROCK; GRANITE; TUNNELS; SHALE	Understanding the creep behaviours of rocks is essential for the long-term stability of underground excavations in mining engineering. Creep behaviours are more important when the mining depth is greater, which leads to the emergence of weak rock masses and high in situ stresses. In this study, the creep behaviours of argillaceous sandstone (AS) were systematically investigated. For the experimen…	[Zheng, Huaiguo; Cai, Qingxiang; Zhou, Wei; Lu, Xiang; Jiskani, Izhar Mithal] China Univ Min & Technol, State Key Lab Coal Resources & Safe Min, Xuzhou 221116, Jiangsu, Peoples R China; [Zheng, Huaiguo; Cai, Qingxiang; Zhou, Wei; Lu, Xiang; Jiskani, Izhar Mithal] China Univ Min & Technol, Sch Mines, Xuzhou 221116, Jiangsu, Peoples R China; [Li, Ming; Zhang, Yu] China Univ Min & Technol, State Key…	Zhou, W (corresponding author), China Univ Min & Technol, State Key Lab Coal Resources & Safe Min, Xuzhou 221116, Jiangsu, Peoples R China.; Zhou, W (corresponding author), China Univ Min & Technol, Sch Mines, Xuzhou 221116, Jiangsu, Peoples R China.; Qi, CC (corresponding author), Univ Western Australia, Sch Civil Environm & Min Engn, Perth, WA 6009, Australia.; Qi, CC (corresponding author), Ce…	DB14020024@cumt.edu.cn; qxcai@cumt.edu.cn; cumtzhw@cumt.edu.cn; Xianglu@cumt.edu.cn; mingl@cumt.edu.cn; chongchong.qi@research.uwa.edu.au; imjiskani@hotmail.com; zhangyucumt1981@126.com	Qi, Chongchong/K-1167-2019; Jiskani, Izhar Mithal/H-2457-2019	Qi, Chongchong/0000-0001-5189-1614; Jiskani, Izhar Mithal/0000-0002-3220-8880; Li, Ming/0000-0001-9861-7858	Independent Research Project of State Key Laboratory of Coal Resources and Safe Mining, China University of Mining and Technology [SKLCRSM18X001]	This research was funded by the Independent Research Project of State Key Laboratory of Coal Resources and Safe Mining, China University of Mining and Technology (SKLCRSM18X001).	Andargoli MBE, 2019, B ENG GEOL ENVIRON, V78, P1617, DOI 10.1007/s10064-018-1243-4; Barla G, 2012, INT J GEOMECH, V12, P697, DOI 10.1061/(ASCE)GM.1943-5622.0000163; Bonini M, 2009, ROCK MECH ROCK ENG, V42, P361, DOI 10.1007/s00603-007-0147-6; Chen L, 2015, EUR J ENVIRON CIV EN, V19, pS43, DOI 10.1080/19648189.2015.1064619; Debernardi D, 2009, ROCK MECH ROCK ENG, V42, P259, DOI 10.1007/s00603-009-…	27	0	0	5	5	MDPI	BASEL	ST ALBAN-ANLAGE 66, CH-4052 BASEL, SWITZERLAND		2076-3417		APPL SCI-BASEL	Appl. Sci.-Basel	NOV	2020	10	21
J	Jendrys, M; Duzy, S; Dyduch, G				Jendrys, Marek; Duzy, Stanislaw; Dyduch, Grzegorz			Analysis of Stress-Strain States in the Vicinity of Mining Excavations in a Rock Mass with Variable Mechanical Properties	ENERGIES			English	Article						rock mass properties; numerical modeling; rock mass stability	RANDOM-FIELDS; DAMAGED ZONE; SPATIAL VARIABILITY; SIMULATION; STRENGTH; PARAMETERS	Rock mass is a medium created through processes that have lasted over four billion years, and its intrinsic feature is the variability of the parameters that describe it. A particularly high variability of mechanical parameters is observed in Carboniferous sedimentary and metamorphic rocks. The mechanical properties, especially the rock mass strength, are essential for the design and maintenance …	[Jendrys, Marek; Duzy, Stanislaw; Dyduch, Grzegorz] Silesian Tech Univ, Fac Min Safety Engn & Ind Automat, Dept Geomech & Underground Construct, Ul Akad 2, PL-44100 Gliwice, Poland	Jendrys, M (corresponding author), Silesian Tech Univ, Fac Min Safety Engn & Ind Automat, Dept Geomech & Underground Construct, Ul Akad 2, PL-44100 Gliwice, Poland.	marekjendrys@gmail.com; stanislaw.duzy@polsl.pl; grzegorz.dyduch@polsl.pl	Jendrys, Marek/ABF-6933-2020	Jendrys, Marek/0000-0003-1159-1275			Aladejare AE, 2020, J ROCK MECH GEOTECH, V12, P256, DOI 10.1016/j.jrmge.2019.08.001; [Anonymous], 2009, FAST LAGRANGIAN ANAL; Brady BH, 2006, ROCK MECH UNDERGROUN; Bukowski P., 2012, AGH J MINING GEOENGI, V36, P57; Cai M, 2014, ROCK MECH ROCK ENG, V47, P659, DOI 10.1007/s00603-013-0437-0; Cai M, 2011, ROCK MECH ROCK ENG, V44, P379, DOI 10.1007/s00603-011-0138-5; Chen DF, 2019, COMPUT GEOTECH, V11…	41	0	0	5	5	MDPI	BASEL	ST ALBAN-ANLAGE 66, CH-4052 BASEL, SWITZERLAND		1996-1073		ENERGIES	Energies	NOV	2020	13	21
J	Malkowski, P; Ostrowski, L; Bednarek, L				Malkowski, Piotr; Ostrowski, Lukasz; Bednarek, Lukasz			The Effect of Selected Factors on Floor Upheaval in Roadways-In Situ Testing	ENERGIES			English	Article						floor upheaval; mining excavations; the fault; water influence on rocks; statistical analysis; underground measurements	HEAVE; STRENGTH; STRESS	The phenomenon of the floor upheaval occurs in virtually every type of rock mass and at every depth, accompanying the process of excavation of tunnels and headings. Despite its inconvenience, it is rarely studied because of the complexity of the process and the multiplicity of the factors causing deformations in floor rocks. To quantify the effect of the selected factors on floor upheaval, this a…	[Malkowski, Piotr; Ostrowski, Lukasz; Bednarek, Lukasz] AGH Univ Sci & Technol, Fac Min & Geoengn, Mickiewicza Av 30, PL-30059 Krakow, Poland	Malkowski, P (corresponding author), AGH Univ Sci & Technol, Fac Min & Geoengn, Mickiewicza Av 30, PL-30059 Krakow, Poland.	malkgeom@agh.edu.pl; lukost@agh.edu.pl; bednarek@agh.edu.pl	Malkowski, Piotr/C-2168-2019; Bednarek, Lukasz/N-4375-2018	Malkowski, Piotr/0000-0003-0870-438X; Bednarek, Lukasz/0000-0002-8239-5864			Babets D, 2019, MIN MINER DEPOSITS, V13, P72, DOI 10.33271/mining13.04.072; Bondarenko Volodymyr, 2018, E3S Web of Conferences, V66, DOI 10.1051/e3sconf/20186603001; Bondarenko VI, 2007, PROC MONOGR ENG WATE, P47; Erguler ZA, 2009, INT J ROCK MECH MIN, V46, P355, DOI 10.1016/j.ijrmms.2008.07.002; Feng GR, 2020, MATH PROBL ENG, V2020, DOI 10.1155/2020/9391309; Qiang F, 2015, INT J MIN SCI TECHNO, …	44	1	1	6	6	MDPI	BASEL	ST ALBAN-ANLAGE 66, CH-4052 BASEL, SWITZERLAND		1996-1073		ENERGIES	Energies	NOV	2020	13	21
J	Ahn, CH; Kim, DJ; Byun, YH				Ahn, Chi-Hyung; Kim, Dong-Ju; Byun, Yong-Hoon			Expansion-Induced Crack Propagation in Rocks Monitored by Using Piezoelectric Transducers	SENSORS			English	Article						crack propagation; expansion; heater; piezoelectric transducer; rock fracture	VIBRATION; DENSITY; VELOCITIES; MECHANISM; MODEL	The objective of this study is to develop a new vibration-free excavation method based on vermiculite expansion for rock cracking and to evaluate the performance of the heating system via elastic wave monitoring. Natural vermiculites expand rapidly in volume when heated above 800 degrees C. MgO powder is used to evenly transmit the surface temperature of a heater rod, which can attain high temper…	[Ahn, Chi-Hyung] Korea Univ Technol & Educ, Sch Elect Elect & Commun Engn, Cheonan Si 31253, South Korea; [Kim, Dong-Ju; Byun, Yong-Hoon] Kyungpook Natl Univ, Sch Agr Civil & Bioind Engn, Daegu 41566, South Korea	Byun, YH (corresponding author), Kyungpook Natl Univ, Sch Agr Civil & Bioind Engn, Daegu 41566, South Korea.	chahn@koreatech.ac.kr; kyrix1028@knu.ac.kr; yhbyun@knu.ac.kr			Korea Agency for Infrastructure Technology Advancement (KAIA) - Ministry of Land, Infrastructure and Transport [18TBIP-C144356-01]	This work is supported by the Korea Agency for Infrastructure Technology Advancement (KAIA) grant funded by the Ministry of Land, Infrastructure and Transport (Grant 18TBIP-C144356-01).	Ahn CH, 2016, ADV MATER SCI ENG, V2016, DOI 10.1155/2016/7531642; Ahn CH, 2015, MATERIALS, V8, P6950, DOI 10.3390/ma8105351; Arshadnejad S, 2011, INT J MIN MET MATER, V18, P509, DOI 10.1007/s12613-011-0470-5; Arshadnejad Shobeir, 2009, YERBILIMLERI J EARTH, V30, P259; Byun JH, 2015, J APPL GEOPHYS, V115, P110, DOI 10.1016/j.jappgeo.2015.02.020; Byun YH, 2019, GEOTEXT GEOMEMBRANES, V47, P177, DOI …	27	2	2	2	2	MDPI	BASEL	ST ALBAN-ANLAGE 66, CH-4052 BASEL, SWITZERLAND		1424-8220		SENSORS-BASEL	Sensors	NOV	2020	20	21
J	Farhadian, H; Nikvar-Hassani, A				Farhadian, Hadi; Nikvar-Hassani, Arash			Development of a new empirical method for Tunnel Squeezing Classification (TSC)	QUARTERLY JOURNAL OF ENGINEERING GEOLOGY AND HYDROGEOLOGY			English	Article							PREDICTION; ROCK; CONVERGENCE; DEFORMATION; STRENGTH; STRESS	The characterization of squeezing phenomena as a geological hazard is of great importance because squeezing has a crucial role in the selection of the route and type of tunnels and in the characteristics of the excavation device. Tunnel squeezing is also the basis for the designation and construction of tunnelling-related structures. We present a new tunnel squeezing classification tool to predic…	[Farhadian, Hadi] Univ Birjand, Fac Engn, Dept Min Engn, Birjand, Iran; [Nikvar-Hassani, Arash] Univ Arizona, Dept Civil & Architectural Engn & Mech, Tucson, AZ USA	Farhadian, H (corresponding author), Univ Birjand, Fac Engn, Dept Min Engn, Birjand, Iran.	farhadian@birjand.ac.ir	Nikvar-Hassani, Arash/AAL-3172-2021; Farhadian, Hadi/L-8274-2017	Farhadian, Hadi/0000-0002-9948-0731			Aghda SMF, 2016, GEOTECH GEOL ENG, V34, P1487, DOI 10.1007/s10706-016-0056-0; Alimohammadlou Y, 2014, CATENA, V120, P149, DOI 10.1016/j.catena.2014.04.009; AYDAN O, 1993, ROCK MECH ROCK ENG, V26, P137, DOI 10.1007/BF01023620; Barla G., 2001, EUROSUMMER SCH TUNNE, P169; Barla G, 1995, INT SOC ROCK MECH NE, P44; Barton N., 1995, INT J ROCK MECH MIN, V5, p232A; Bhasin R, 1996, TUNN UNDERGR SP TECH, …	43	1	1	2	2	GEOLOGICAL SOC PUBL HOUSE	BATH	UNIT 7, BRASSMILL ENTERPRISE CENTRE, BRASSMILL LANE, BATH BA1 3JN, AVON, ENGLAND	1470-9236	2041-4803		Q J ENG GEOL HYDROGE	Q. J. Eng. Geol. Hydrogeol.	NOV	2020	53	4
J	Fernando, H; Marshall, J				Fernando, Heshan; Marshall, Joshua			What lies beneath: Material classification for autonomous excavators using proprioceptive force sensing and machine learning	AUTOMATION IN CONSTRUCTION			English	Article						Material classification; Force sensing; Machine learning; Robotic excavation; Loader automation	ROCK; IDENTIFICATION; PARAMETERS	The ability of robotic excavators to acquire meaningful knowledge about materials during digging can augment their autonomous functionality, as well as optimize downstream operations in construction and mining. Some material properties, such as rock sizes, can be determined visually, but these methods cannot see what lies beneath. In this work, a classification methodology that utilizes only prop…	[Fernando, Heshan; Marshall, Joshua] Queens Univ, Ingenu Labs Res Inst, Dept Mech & Mat Engn, 69 Union St W, Kingston, ON K7L 3N6, Canada; [Marshall, Joshua] Queens Univ, Ingenu Labs Res Inst, Dept Elect & Comp Engn, 69 Union St W, Kingston, ON K7L 3N6, Canada	Fernando, H (corresponding author), Queens Univ, Ingenu Labs Res Inst, Dept Mech & Mat Engn, 69 Union St W, Kingston, ON K7L 3N6, Canada.	heshan.fernando@queensu.ca; joshua.marshall@queensu.ca			Epiroc AB; NSERC Project RGPIN [2015-04025]; NSERC Canadian Robotics Network (NCRN)	This project was funded in part by Epiroc AB (original data collection), NSERC Project RGPIN 2015-04025, and the NSERC Canadian Robotics Network (NCRN).	Althoefer K, 2009, IEEE T INSTRUM MEAS, V58, P3633, DOI 10.1109/TIM.2009.2018699; Bamford T, 2017, INT J MIN RECLAM ENV, V31, P439, DOI 10.1080/17480930.2017.1339170; Bandyopadhyaya I, 2014, IEEE INT ADV COMPUT, P1231, DOI 10.1109/IAdCC.2014.6779503; Cross M, 2013, J TERRAMECHANICS, V50, P165, DOI 10.1016/j.jterra.2013.04.002; Dadhich S, 2016, AUTOMAT CONSTR, V68, P212, DOI 10.1016/j.autcon.2016.…	35	0	0	13	19	ELSEVIER	AMSTERDAM	RADARWEG 29, 1043 NX AMSTERDAM, NETHERLANDS	0926-5805	1872-7891		AUTOMAT CONSTR	Autom. Constr.	NOV	2020	119
J	Barzegari, G; Tirkhooni, M; Khabbazi, A				Barzegari, Ghodrat; Tirkhooni, Mehrnaz; Khabbazi, Amir			Experimental assessment of clayey layers for clogging of TBM in Tabriz subway lines, Iran	TUNNELLING AND UNDERGROUND SPACE TECHNOLOGY			English	Article						TBM clogging; Adhesion; Clayey layers; Mechanized tunneling; Tabriz subway	ADHESION; SOIL	Clogging phenomenon is defined as the excessive adhesion of clayey particles to drilling equipment that adversely affect machine efficiency. This study involves the clogging potential of clayey soil and rock samples collected from Tabriz subway lines that were tested by laboratory experiments. In order to achieve the objectives of this study, a series of analyses were carried out including sieve …	[Barzegari, Ghodrat; Tirkhooni, Mehrnaz] Univ Tabriz, Fac Nat Sci, Dept Earth Sci, Tabriz, Iran; [Khabbazi, Amir] Abroft Pey Azhand Consoulting Engineers, Tehran, Iran	Barzegari, G (corresponding author), Univ Tabriz, Fac Nat Sci, Dept Earth Sci, Tabriz, Iran.	gbarzegari@tabrizu.ac.ir					[Anonymous], 2010, D431810E1 ASTM; [Anonymous], 2016, D464416 ASTM ASTM IN; [Anonymous], 2014, D85414 ASTM ASTM INT; [Anonymous], 2007, D42263E2 ASTM ASTM I; [Anonymous], 2004, D308004 ASTM ASTM IN; Asghari-Kaljahi E, 2019, GEOMECH ENG, V18, P267, DOI 10.12989/gae.2019.18.3.267; Atkinson JH, 2003, Q J ENG GEOL HYDROGE, V36, P293, DOI 10.1144/1470-9236/03-024; Barzegari G, 2018, GEOTECH GEOL ENG, …	51	0	0	12	26	PERGAMON-ELSEVIER SCIENCE LTD	OXFORD	THE BOULEVARD, LANGFORD LANE, KIDLINGTON, OXFORD OX5 1GB, ENGLAND	0886-7798			TUNN UNDERGR SP TECH	Tunn. Undergr. Space Technol.	NOV	2020	105
J	Fodera, GM; Voza, A; Barovero, G; Tinti, F; Boldini, D				Fodera, G. M.; Voza, A.; Barovero, G.; Tinti, F.; Boldini, D.			Factors influencing overbreak volumes in drill-and-blast tunnel excavation. A statistical analysis applied to the case study of the Brenner Base Tunnel - BBT	TUNNELLING AND UNDERGROUND SPACE TECHNOLOGY			English	Article						Brenner Base Tunnel; Geological overbreak; Technical overbreak; Rock Mass Rating; Blast hole length; Statistical analysis	PREDICTION; PARAMETERS	This paper deals with the analysis of overbreak in tunnels excavated with the drill-and-blast method. The overbreak phenomenon has many negative impacts on tunnelling organisation and economy and its precise assessment plays a fundamental role in the process of construction optimisation. The study proposes an operative methodology to estimate overbreak volumes and to distinguish so-called technic…	[Fodera, G. M.; Voza, A.; Barovero, G.] Galleria Base Brennero Brenner Basistunnel BBT SE, Piazza Stazione 1, I-39100 Bolzano, Italy; [Tinti, F.; Boldini, D.] Univ Bologna, Dept Civil Chem Environm & Mat Engn, Via Terracini 28, I-40131 Bologna, Italy; [Boldini, D.] Sapienza Univ Rome, Dept Chem Engn Mat Environm, Via Eudossiana 18, I-00184 Rome, Italy	Boldini, D (corresponding author), Sapienza Univ Rome, Dept Chem Engn Mat Environm, Via Eudossiana 18, I-00184 Rome, Italy.	daniela.boldini@uniroma1.it		TINTI, FRANCESCO/0000-0002-6750-9368; BOLDINI, DANIELA/0000-0001-7423-043X			Andersson P., 1992, 8 SVEBEFO SWED ROCK; Boldini D, 2018, ROCK MECH ROCK ENG, V51, P1955, DOI 10.1007/s00603-018-1446-9; Dey K, 2012, TUNN UNDERGR SP TECH, V28, P49, DOI 10.1016/j.tust.2011.09.004; Gong FQ, 2008, J CENT SOUTH UNIV T, V15, P498, DOI 10.1007/s11771-008-0094-8; Hoek E., 1980, UNDERGROUND EXCAVATI; Ibarra JA., 1996, GEOTECH GEOL ENG, V14, P325, DOI [10.1007/BF00421947, DOI 10.1007/BF…	24	3	3	27	35	PERGAMON-ELSEVIER SCIENCE LTD	OXFORD	THE BOULEVARD, LANGFORD LANE, KIDLINGTON, OXFORD OX5 1GB, ENGLAND	0886-7798			TUNN UNDERGR SP TECH	Tunn. Undergr. Space Technol.	NOV	2020	105
J	Hamzaban, MT; Mohammadi, NRS; Jakobsen, PD				Hamzaban, Mohammad-Tagh; Mohammadi, Negin Rish Sefid; Jakobsen, Pal Drevland			The effect of the particle size distribution curve on the abrasivity of noncohesive soils in LCPC test	TUNNELLING AND UNDERGROUND SPACE TECHNOLOGY			English	Article						Mechanized excavation; Soil abrasivity; LCPC test; Particles size distribution curve	WEAR; EXCAVATION; TOOLS	Despite the widespread use of soil excavating tools, including soft ground shield TBMs, there is not any universally accepted method for soil abrasivity assessments. However, different experimental models have recently developed to study the abrasivity of soil materials. LCPC test, developed in Laboratoire Central des Ponts et Chaussees, is one of the most common, simplest, and most available app…	[Hamzaban, Mohammad-Tagh; Mohammadi, Negin Rish Sefid] Sahand Univ Technol, Min Engn Fac, Tabriz 5331811111, Iran; [Jakobsen, Pal Drevland] NTNU, Dept Civil & Transport Engn, N-7491 Trondheim, Norway	Hamzaban, MT (corresponding author), Sahand Univ Technol, Min Engn Fac, Tabriz 5331811111, Iran.	hamzaban@sut.ac.ir	Hamzaban, Mohammad-Taghi/H-6020-2019	Hamzaban, Mohammad-Taghi/0000-0002-4453-0543			ALAVI GE, 2011, TUNN UNDERGR SP TECH, V26, P604, DOI DOI 10.1016/J.TUST.2011.04.003; [Anonymous], 1990, P18579 AFNOR; Barzegari G, 2015, TUNN UNDERGR SP TECH, V48, P43, DOI 10.1016/j.tust.2014.10.010; Barzegari G, 2013, Q J ENG GEOL HYDROGE, V46, P63, DOI 10.1144/qjegh2012-039; Das B.M., 2014, PRINCIPLES GEOTECHNI; Drucker P., 2011, GEOMECH TUNN, V6, P681, DOI DOI 10.1002/GE0T.201100051; Gharahba…	27	0	0	5	6	PERGAMON-ELSEVIER SCIENCE LTD	OXFORD	THE BOULEVARD, LANGFORD LANE, KIDLINGTON, OXFORD OX5 1GB, ENGLAND	0886-7798			TUNN UNDERGR SP TECH	Tunn. Undergr. Space Technol.	NOV	2020	105
J	Iwano, K; Hashiba, K; Nagae, J; Fukui, K				Iwano, K.; Hashiba, K.; Nagae, J.; Fukui, K.			Reduction of tunnel blasting induced ground vibrations using advanced electronic detonators	TUNNELLING AND UNDERGROUND SPACE TECHNOLOGY			English	Article						Tunnel blasting; Ground vibration; Electronic detonator; Delay interval		Blasting has been widely used for economical and rapid rock excavation in civil and mining engineering but has great loads, such as vibrations and noises, on the surrounding environment in the case of urban areas near dwellings and important structures. In this study, for the purpose of environmental load reduction, blasting tests were conducted at a tunnel construction site using advanced electr…	[Iwano, K.] Kajima Corp, Minato Ku, 6-5-11 Akasaka, Tokyo 1078348, Japan; [Hashiba, K.; Fukui, K.] Univ Tokyo, Bunkyo Ku, 7-3-1 Hongo, Tokyo 1138656, Japan; [Nagae, J.] Sumitomo Met Min Co Ltd, 3844,Hishikarimaeme, Isa City, Kagoshima 8952701, Japan	Hashiba, K (corresponding author), Univ Tokyo, Bunkyo Ku, 7-3-1 Hongo, Tokyo 1138656, Japan.	hashiba@sys.t.u-tokyo.ac.jp					Aldas GGU, 2008, J APPL GEOPHYS, V66, P25, DOI 10.1016/j.jappgeo.2008.08.004; Anderson D.A., 1993, COMPREHENSIVE ROCK E, P95; Azizabadi HRM, 2014, COMPUT GEOTECH, V61, P42, DOI 10.1016/j.compgeo.2014.04.008; BLAIR DP, 1993, INT J NUMER ANAL MET, V17, P95, DOI 10.1002/nag.1610170203; Blair DP, 1999, INT J BLASTING FRAGM, Vv3, P335, DOI DOI 10.1080/; Dowding C.H., 1993, COMPREHENSIVE ROCK E, P95; H…	16	3	3	19	26	PERGAMON-ELSEVIER SCIENCE LTD	OXFORD	THE BOULEVARD, LANGFORD LANE, KIDLINGTON, OXFORD OX5 1GB, ENGLAND	0886-7798			TUNN UNDERGR SP TECH	Tunn. Undergr. Space Technol.	NOV	2020	105
J	Li, R; Zhang, DL; Fang, Q; Liu, DP; Luo, JW; Fang, HC				Li, Ran; Zhang, Dingli; Fang, Qian; Liu, Daoping; Luo, Jiwei; Fang, Huangcheng			Mechanical responses of closely spaced large span triple tunnels	TUNNELLING AND UNDERGROUND SPACE TECHNOLOGY			English	Article						Triple tunnels; Large span; Mechanical response; Field monitoring; Numerical simulation	TWIN-TUNNELS; UNDERGROUND EXCAVATION; STRESS REDISTRIBUTION; SHALLOW TUNNELS; ROCK; PRESSURE; CONSTRUCTION; STABILITY; MOVEMENTS; BEHAVIOR	This paper presents a case study of closely spaced triple tunnels with large sections in Beijing, China. The mechanical responses of three cross-sections were systematically monitored and analyzed, including the surrounding rock pressure, the internal stress in steel frame and shotcrete, the axial force in pillar-reinforcing bolts, the crown settlement, and the horizontal convergence. It was foun…	[Li, Ran; Zhang, Dingli; Fang, Qian; Liu, Daoping; Luo, Jiwei; Fang, Huangcheng] Beijing Jiaotong Univ, Minist Educ, Key Lab Urban Underground Engn, Beijing 100044, Peoples R China	Fang, Q (corresponding author), Beijing Jiaotong Univ, Minist Educ, Key Lab Urban Underground Engn, Beijing 100044, Peoples R China.	qfang@bjtu.edu.cn			Fundamental Research Funds for the Central UniversitiesFundamental Research Funds for the Central Universities [2020YJS103]; National Key R&D Program of China [2017YFC0805401]; National Natural Science of ChinaNational Natural Science Foundation of China (NSFC) [51738002]; Key Project of High-speed Rail Joint Fund of National Natural Science Foundation of ChinaNational Natural Science Foundation …	The authors gratefully acknowledge the financial support by the Fundamental Research Funds for the Central Universities under Grant 2020YJS103, National Key R&D Program of China under Grant 2017YFC0805401, National Natural Science of China under Grant 51738002, and Key Project of High-speed Rail Joint Fund of National Natural Science Foundation of China under Grant U1934210.	[Anonymous], 2015, 92182015 QCR; [Anonymous], 2016, TB100032016; Avgerinos V, 2017, GEOTECHNIQUE, V67, P808, DOI 10.1680/jgeot.SiP17.P.103; Banerjee SK, 2018, INT J GEOMECH, V18, DOI 10.1061/(ASCE)GM.1943-5622.0001216; Boonyarak T, 2015, CAN GEOTECH J, V52, P851, DOI 10.1139/cgj-2014-0235; Cao CY, 2018, KSCE J CIV ENG, V22, P3170, DOI 10.1007/s12205-017-1586-6; Cao LQ, 2020, TUNN UNDERGR SP TECH,…	44	1	1	32	48	PERGAMON-ELSEVIER SCIENCE LTD	OXFORD	THE BOULEVARD, LANGFORD LANE, KIDLINGTON, OXFORD OX5 1GB, ENGLAND	0886-7798			TUNN UNDERGR SP TECH	Tunn. Undergr. Space Technol.	NOV	2020	105
J	Sharifzadeh, M; Lou, JF; Crompton, B				Sharifzadeh, Mostafa; Lou, Jinfu; Crompton, Brendan			Dynamic performance of energy-absorbing rockbolts based on laboratory test results. Part I: Evolution, deformation mechanisms, dynamic performance and classification	TUNNELLING AND UNDERGROUND SPACE TECHNOLOGY			English	Article						Energy-absorbing rockbolt; Dynamic test; Dynamic performance; Energy absorption mechanism; Energy absorption rate (EAR)	SUPPORT; BOLT	Deep mining and the related dynamic loading are the critical challenges confronting the reinforcement system like energy-absorbing rockbolts, which plays a decisive role in the dynamic response of underground mine excavations. Over the past decades, various types of novel energy-absorbing rockbolts with different deformation mechanisms and dynamic characteristics have been invented. Meanwhile, th…	[Sharifzadeh, Mostafa; Lou, Jinfu] Curtin Univ, Western Australian Sch Mines, Dept Min & Met Engn, Kalgoorlie 6430, Australia; [Sharifzadeh, Mostafa] Northeastern Univ, Minist Educ Safe Min Deep Met Mines, Key Lab, Shenyang 110819, Liaoning, Peoples R China; [Lou, Jinfu] CCTEG Coal Min Res Inst, Beijing 100013, Peoples R China; [Lou, Jinfu] China Coal Res Inst, State Key Lab Coal Min & Clean Util…	Sharifzadeh, M (corresponding author), Curtin Univ, Western Australian Sch Mines, Dept Min & Met Engn, Kalgoorlie 6430, Australia.; Sharifzadeh, M (corresponding author), Northeastern Univ, Minist Educ Safe Min Deep Met Mines, Key Lab, Shenyang 110819, Liaoning, Peoples R China.	m.sharifzadeh@curtin.edu.au; 13716758354@163.com; Brendan.Crompton@newconceptmining.com			China Coal Technology & Engineering Group [2018RC001]; National Natural Science Foundation of ChinaNational Natural Science Foundation of China (NSFC) [51874175, 51774185]; National Natural Science Foundation of China the 111 Project [51839003, B17009]	The authors sincerely appreciate the constructive and valuable comments from the editors and anonymous reviewers to help improve the paper. The authors gratefully acknowledge the financial support from China Coal Technology & Engineering Group (Grant No. 2018RC001), the National Natural Science Foundation of China (Grant Nos. 51874175, 51774185), and National Natural Science Foundation of China t…	ASTM, 2008, STAND TEST METH LAB, DOI D7401-08; Cai M., 2018, ROCKBURST PHENOMENA, VI, P284; CAMIRO, 1995, CAN ROCKB RES PROGR; CHARETTE F, 2007, DEEP MINING 07, V07, P395; Hadjigeorgiou J, 2011, ROCK MECH ROCK ENG, V44, P565, DOI 10.1007/s00603-011-0155-4; He MC, 2017, TUNN UNDERGR SP TECH, V64, P103, DOI 10.1016/j.tust.2016.12.007; He MC, 2014, INT J ROCK MECH MIN, V67, P29, DOI 10.1016/j.ijrmms…	36	2	2	10	15	PERGAMON-ELSEVIER SCIENCE LTD	OXFORD	THE BOULEVARD, LANGFORD LANE, KIDLINGTON, OXFORD OX5 1GB, ENGLAND	0886-7798			TUNN UNDERGR SP TECH	Tunn. Undergr. Space Technol.	NOV	2020	105
J	Kabwe, E; Karakus, M; Chanda, EK				Kabwe, Eugie; Karakus, Murat; Chanda, Emmanuel K.			Isotropic damage constitutive model for time-dependent behaviour of tunnels in squeezing ground	COMPUTERS AND GEOTECHNICS			English	Article						Accelerated creep; Isotropic damage; Delayed deformations; Fractal-order derivative; Squeezing ground	ROCK-SALT; VISCOPLASTIC MODEL; CREEP MODEL; DEFORMATION; EXCAVATION	The conventional constitutive models employed to describe rock mass creep behaviour associated with the squeezing mechanism are widely adopted in research and design practice. However, these models fail to explicitly replicate the 3-phase creep behaviour especially the accelerated creep phase; only the transient and steady-state creep phase are described explicitly. Hence, this paper presents a v…	[Kabwe, Eugie; Karakus, Murat; Chanda, Emmanuel K.] Univ Adelaide, Sch Civil Environm & Min Engn, Adelaide, SA 5005, Australia	Kabwe, E (corresponding author), Univ Adelaide, Sch Civil Environm & Min Engn, Adelaide, SA 5005, Australia.	eugie.kabwe@adelaide.edu.au	Karakus, Murat/A-9517-2011	Karakus, Murat/0000-0001-6701-1888			Adachi T., 1982, SOILS FDN, V22, P57, DOI [10.3208/sandf1972.22.4_572-s2.0-0020274432, DOI 10.3208/SANDF1972.22.4_572-S2.0-0020274432]; Barla G., 2008, P 12 INT C INT ASS C, P1; BOUKHAROV GN, 1995, INT J ROCK MECH MIN, V32, P325, DOI 10.1016/0148-9062(94)00048-8; Bruning T, 2019, INT J ROCK MECH MIN, V116, P1, DOI 10.1016/j.ijrmms.2019.03.003; Cai W, 2016, INT J NONLIN MECH, V87, P58, DOI 10.1016…	57	1	1	12	25	ELSEVIER SCI LTD	OXFORD	THE BOULEVARD, LANGFORD LANE, KIDLINGTON, OXFORD OX5 1GB, OXON, ENGLAND	0266-352X	1873-7633		COMPUT GEOTECH	Comput. Geotech.	NOV	2020	127
J	Herrero-Bervera, E; Athens, S; Tema, E; Valdivia, LMA; Camps, P; Trejo, AR				Herrero-Bervera, Emilio; Athens, Stephen; Tema, Evdokia; Alva Valdivia, Luis Manuel; Camps, Pierre; Rodriguez Trejo, Alejandro			First archaeointensity results from Ecuador with rock magnetic analyses and 14C dates to constrain the geomagnetic field evolution in South America: Enhancing the knowledge of geomagnetic field intensity	JOURNAL OF SOUTH AMERICAN EARTH SCIENCES			English	Article						Absolute archaeointensity; Low latitude; pottery; Ecuador; South America	ABSOLUTE PALEOINTENSITY; PALEOMAGNETIC DATA; SECULAR VARIATION; PARTICLE-SYSTEMS; REVERSAL; RECONSTRUCTIONS; COERCIVITY; DEPENDENCE; MILLENNIA; CERAMICS	Archaeomagnetic records from low-latitude sites are very scarce. Thus, the information about the geomagnetic field evolution in South America or Ecuador is sparse and more data are needed to constrain the field evolution in South America. In this study we present new absolute archaeointensity results from a set of C-14 well-dated (i.e. calibrated ages) prehistoric archaeological sites in northern…	[Herrero-Bervera, Emilio] Univ Hawaii Manoa, Magnet Mat & Paleomagnet & Petrofabr Lab, Hawaii Inst Geophys & Planetol, Honolulu, HI 96822 USA; [Athens, Stephen] Int Archaeol Res Inst IARII, Honolulu, HI USA; [Tema, Evdokia] Univ Torino, Dipartimento Sci Terra, Turin, Italy; [Tema, Evdokia] ALP Alpine Palaeomagnet Lab, Peveragno, Italy; [Alva Valdivia, Luis Manuel] Univ Nacl Autonoma Mexico, Inst …	Herrero-Bervera, E (corresponding author), Univ Hawaii Manoa, Magnet Mat & Paleomagnet & Petrofabr Lab, Hawaii Inst Geophys & Planetol, Honolulu, HI 96822 USA.; Herrero-Bervera, E (corresponding author), Univ Hawaii Manoa, Hawaii Inst Geophys & Planetol, 1680 East West Rd,POST 602, Honolulu, HI 96822 USA.	herrero@soest.hawaii.edu	CAMPS, Pierre/F-2084-2013	CAMPS, Pierre/0000-0002-6637-4342	National Science FoundationNational Science Foundation (NSF); SOEST-HIGP	We are pleased to thank Mr James Lau for his assistance during the laboratory experiments. Professor Manuel Calvo Rathert read and critically reviewed the manuscript suggesting corrections, upgrades and improvements that made the manuscript much better than the original version of the article, we thank him for his help. We also thank in advance two anonymous referees for their very constructive, …	Reyes BA, 2013, J GEOPHYS RES-SOL EA, V118, P2753, DOI 10.1002/jgrb.50196; Aidona E, 2010, B GEOL SOC GREECE, VXLIII, P1888; Aidona E, 2012, STUD GEOPHYS GEOD, V56, P827, DOI 10.1007/s11200-011-9006-8; AITKEN MJ, 1981, ARCHAEOMETRY, V23, P53, DOI 10.1111/j.1475-4754.1981.tb00954.x; AITKEN MJ, 1988, REV GEOPHYS, V26, P3, DOI 10.1029/RG026i001p00003; Alva-Valdivia LM, 2010, PHYS EARTH PLANET IN, V1…	74	0	0	0	3	PERGAMON-ELSEVIER SCIENCE LTD	OXFORD	THE BOULEVARD, LANGFORD LANE, KIDLINGTON, OXFORD OX5 1GB, ENGLAND	0895-9811			J S AM EARTH SCI	J. South Am. Earth Sci.	NOV	2020	103
J	Noren-Cosgriff, KM; Ramstad, N; Neby, A; Madshus, C				Noren-Cosgriff, K. M.; Ramstad, N.; Neby, A.; Madshus, C.			Building damage due to vibration from rock blasting	SOIL DYNAMICS AND EARTHQUAKE ENGINEERING			English	Article						Blast vibration; Strain; Building damage; Limit value; Building amplification; Frequency		Construction activities such as blasting, piling, compaction, excavations, and construction traffic can produce vibrations of sufficient strength to cause damage to neighbouring buildings and structures. Therefore, many countries have national limit values for construction vibration in standards. However, building damages assumed to originate from vibrations are seldom observed. This may indicate…	[Noren-Cosgriff, K. M.; Madshus, C.] Norwegian Geotech Inst, NGI, POB 3930 Ulleval Stad, N-0806 Oslo, Norway; [Ramstad, N.] Multiconsult, POB 265 Skoyen, N-0213 Oslo, Norway; [Neby, A.] Staten Vegvesen Norwegian Publ Rd Adm, Oslo, Norway	Noren-Cosgriff, KM (corresponding author), Norwegian Geotech Inst, NGI, POB 3930 Ulleval Stad, N-0806 Oslo, Norway.	knc@ngi.no			research project Remedy (Risk Reduction of Groundwork Damage) - Research Council of Norway [267674]; NPRA Directorate of Public Roads (Statens vegvesen Vegdirektoratet); National Railroad Authority (Bane NOR); Norwegian Association of Heavy Equipment Contractors (MEF); Norwegian Defence Estates Agency (Forsvarsbygg); Norwegian Contractors Association (ESA)	This study was performed with support from the research project Remedy (Risk Reduction of Groundwork Damage), funded by the Research Council of Norway, Grant Agreement 267674. The field test was financed by NPRA Directorate of Public Roads (Statens vegvesen Vegdirektoratet), National Railroad Authority (Bane NOR), Norwegian Association of Heavy Equipment Contractors (MEF), The Norwegian Defence E…	Ambraseys N. R., 1968, ROCK MECH ENG PRACTI, P203; [Anonymous], 2001, 8141 NS; [Anonymous], 1993, 73852 BS; [Anonymous], 41503201612 DIN; [Anonymous], 1996, 025210 SS SIS; Bayraktar A, 2010, SOIL DYN EARTHQ ENG, V30, P310, DOI 10.1016/j.soildyn.2009.12.005; Bendat J.S., 2010, RANDOM DATA ANAL MEA, V4th ed.; Bergling JO, 1977, BYGGFORSKININGEN, VR32; Bogdanoff I, 1975, BYGGFORSKININGEN; Cartwright…	26	2	2	4	6	ELSEVIER SCI LTD	OXFORD	THE BOULEVARD, LANGFORD LANE, KIDLINGTON, OXFORD OX5 1GB, OXON, ENGLAND	0267-7261	1879-341X		SOIL DYN EARTHQ ENG	Soil Dyn. Earthq. Eng.	NOV	2020	138
J	Haas, M; Galler, R; Scibile, L; Benedikt, M				Haas, Maximilian; Galler, Robert; Scibile, Luigi; Benedikt, Michael			Waste or valuable resource - a critical European review on re-using and managing tunnel excavation material	RESOURCES CONSERVATION AND RECYCLING			English	Review						Re-use; Excavation; Tunnelling; Waste; Legislation; Europe	ENVIRONMENTAL-MANAGEMENT SYSTEMS; DEMOLITION WASTE; CIRCULAR ECONOMY; CONSTRUCTION; BARRIERS; PERSPECTIVES; EFFICIENCY; DISPOSAL; SITES	Re-use of excavated rock and soil from subsurface tunnelling has become an essential legal and technical factor in underground construction projects. European Union initiatives have caused an emergence of legal documents and technical guidelines for re-using excavated material. An improving situation towards a homogeneous European legislation is missing and site-specific re-use solutions are stil…	[Haas, Maximilian; Scibile, Luigi; Benedikt, Michael] European Org Nucl Res CERN, Esplanade Particules 1, CH-1211 Meyrin, Switzerland; [Haas, Maximilian; Galler, Robert] Montanuniversitat, Chair Subsurface Engn, Erzherzog Johann Str 3, A-8700 Leoben, Austria	Haas, M (corresponding author), European Org Nucl Res CERN, Esplanade Particules 1, CH-1211 Meyrin, Switzerland.; Haas, M (corresponding author), Montanuniversitat, Chair Subsurface Engn, Erzherzog Johann Str 3, A-8700 Leoben, Austria.	maximilian.mathias.haas@cern.ch		Haas, Maximilian/0000-0002-1246-7869			Allesch A, 2017, ENVIRON SCI TECHNOL, V51, P540, DOI 10.1021/acs.est.6b04204; Allwood JM, 2011, RESOUR CONSERV RECY, V55, P362, DOI 10.1016/j.resconrec.2010.11.002; Altamura P., 2013, THESIS; Andrews D, 2015, LOCAL ECON, V30, P305, DOI 10.1177/0269094215578226; Arm M, 2017, WASTE BIOMASS VALORI, V8, P1491, DOI 10.1007/s12649-016-9661-7; Association Francaise des Tunnels Et De L'Espace Souterrain …	90	0	0	8	20	ELSEVIER	AMSTERDAM	RADARWEG 29, 1043 NX AMSTERDAM, NETHERLANDS	0921-3449	1879-0658		RESOUR CONSERV RECY	Resour. Conserv. Recycl.	NOV	2020	162
J	Luo, Y; Gong, FQ; Liu, DQ				Luo, Yong; Gong, Fengqiang; Liu, Dongqiao			Experimental Investigation of Unloading-Induced Red Sandstone Failure: Insight into Spalling Mechanism and Strength-Weakening Effect	ADVANCES IN CIVIL ENGINEERING			English	Article							INTERMEDIATE PRINCIPAL STRESS; CONFINING PRESSURE; SURROUNDING ROCK; BRITTLE ROCK; EXCAVATION; ROCKBURST; DAMAGE; BEHAVIOR; TUNNEL; EVOLUTION	To study the effect of excavation unloading on hard rock failure, a series of true-triaxial compression tests, biaxial compression tests, and true-triaxial unloading compression tests (two different unloading rates) at different confining pressures was conducted on red sandstone cube samples. The strength and failure characteristics and their relationship for red sandstone unloading at different …	[Luo, Yong] Univ South China, Sch Resources Environm & Safety Engn, Hengyang 421001, Peoples R China; [Luo, Yong; Gong, Fengqiang] Cent South Univ, Sch Resources & Safety Engn, Changsha 410083, Peoples R China; [Gong, Fengqiang; Liu, Dongqiao] China Univ Min & Technol Beijing, State Key Lab Geomech & Deep Underground Engn, Beijing 100083, Peoples R China; [Gong, Fengqiang] Southeast Univ, Sch Civ…	Gong, FQ (corresponding author), Cent South Univ, Sch Resources & Safety Engn, Changsha 410083, Peoples R China.; Gong, FQ (corresponding author), China Univ Min & Technol Beijing, State Key Lab Geomech & Deep Underground Engn, Beijing 100083, Peoples R China.; Gong, FQ (corresponding author), Southeast Univ, Sch Civil Engn, Nanjing 211189, Peoples R China.	fengqiangg@126.com			National Natural Science Foundation of ChinaNational Natural Science Foundation of China (NSFC) [41877272]; State Key Laboratory for GeoMechanics and Deep Underground Engineering, China University of Mining & Technology, Beijing [SKLGDUEK1827]; University of South China [190XQD091]	This work was supported by the Project of the National Natural Science Foundation of China (Grant no. 41877272), the State Key Laboratory for GeoMechanics and Deep Underground Engineering, China University of Mining & Technology, Beijing (Grant no. SKLGDUEK1827), and University of South China Research Fund (190XQD091).	Akdag S, 2018, ROCK MECH ROCK ENG, V51, P1657, DOI 10.1007/s00603-018-1415-3; Amundsen HA, 2020, GEOTECHNIQUE, V70, P503, DOI 10.1680/jgeot.18.P.083; Bai QS, 2016, THEOR APPL FRACT MEC, V86, P197, DOI 10.1016/j.tafmec.2016.07.005; Cai M, 2008, INT J ROCK MECH MIN, V45, P763, DOI 10.1016/j.ijrmms.2007.07.026; Cong Y, 2020, INT J GEOMECH, V20, DOI 10.1061/(ASCE)GM.1943-5622.0001647; Cui J, 2017, CE…	51	0	0	0	0	HINDAWI LTD	LONDON	ADAM HOUSE, 3RD FLR, 1 FITZROY SQ, LONDON, W1T 5HF, ENGLAND	1687-8086	1687-8094		ADV CIV ENG	Adv. Civ. Eng.	OCT 31	2020	2020
J	Nie, LC; Zhang, YH; Su, MX; Geng, YJ; Liu, ZY; Fan, KR; Yan, B; Shen, JF				Nie, Lichao; Zhang, Yongheng; Su, Maoxin; Geng, Yijun; Liu, Zhengyu; Fan, Kerui; Yan, Bing; Shen, Junfeng			Comprehensive Ahead Prospecting of Tunnels in Severely Weathered Rock Mass Environments with High Water Inrush Risk: A Case Study in Shaanxi Province	ADVANCES IN CIVIL ENGINEERING			English	Article							DIVERSION PROJECT; RESISTIVITY; CHINA; PREDICTION; FRONT; ZONES; BASIN; FIELD; AREA; FACE	The ahead geological prospecting of severely weathered surrounding rock in a tunnel is challenging due to complex geological conditions. Hence, the best approach is to use a variety of geophysical exploration methods. In this study, we have applied seismic, electrical resistivity (ER), and transient electromagnetic (TEM) methodologies for ahead prospecting of the highly weathered and complex surr…	[Nie, Lichao; Zhang, Yongheng; Su, Maoxin; Liu, Zhengyu; Fan, Kerui; Yan, Bing; Shen, Junfeng] Shandong Univ, Geotech & Struct Engn Res Ctr, Jinan 250100, Peoples R China; [Geng, Yijun] Yellow River Survey Planning Design & Res Inst Co, Zhengzhou 450003, Peoples R China	Liu, ZY (corresponding author), Shandong Univ, Geotech & Struct Engn Res Ctr, Jinan 250100, Peoples R China.	liuzhengyu@sdu.edu.cn					Alimoradi A, 2008, TUNN UNDERGR SP TECH, V23, P711, DOI 10.1016/j.tust.2008.01.001; Araffa SAS, 2015, J AFR EARTH SCI, V105, P93, DOI 10.1016/j.jafrearsci.2015.02.011; Ashida Y, 2001, INT J ROCK MECH MIN, V38, P823, DOI 10.1016/S1365-1609(01)00047-8; Auken E, 2006, GEOPHYSICS, V71, pG249, DOI 10.1190/1.2335575; Bu L, 2019, B ENG GEOL ENVIRON, V78, P357, DOI 10.1007/s10064-017-1114-4; Chen L, 2019…	41	0	0	3	3	HINDAWI LTD	LONDON	ADAM HOUSE, 3RD FLR, 1 FITZROY SQ, LONDON, W1T 5HF, ENGLAND	1687-8086	1687-8094		ADV CIV ENG	Adv. Civ. Eng.	OCT 31	2020	2020
J	Kahraman, S; Canpolat, AN; Fener, M; Kilic, CO				Kahraman, Sair; Canpolat, Ahmet Niyazi; Fener, Mustafa; Kilic, Cumhur Ozcan			The assessment of the factors affecting the microwave heating of magmatic rocks	GEOMECHANICS AND GEOPHYSICS FOR GEO-ENERGY AND GEO-RESOURCES			English	Article						Magmatic rocks; Microwave irradiation; Mineralogy; Micro-structure	IRRADIATION	Low cutting rate and high tool wear are the important problems during excavating hard rocks. In order to find a solution for these problems, some investigations have been carried out by several researchers. One of the recent studies is the microwave assisted excavation of hard rocks. Revealing the impacts of microwave exposure on the minerals and micro-structures of rocks will be useful for the i…	[Kahraman, Sair] Hacettepe Univ, Min Engn Dept, Ankara, Turkey; [Canpolat, Ahmet Niyazi; Kilic, Cumhur Ozcan] Gen Directorate Mineral Res & Explorat, Ankara, Turkey; [Fener, Mustafa] Ankara Univ, Dept Geol Engn, Ankara, Turkey	Kahraman, S (corresponding author), Hacettepe Univ, Min Engn Dept, Ankara, Turkey.	sairkahraman@yahoo.com			TUBITAK (The Scientific and Technological Research Council of Turkey)Turkiye Bilimsel ve Teknolojik Arastirma Kurumu (TUBITAK) [216M003]	The authors would like to thank TUBITAK (The Scientific and Technological Research Council of Turkey) for supporting the study (Project No. 216M003).	[Anonymous], 1990, MICROWAVES MINERALS; Bisai R, 2020, ARAB J GEOSCI, V13, DOI 10.1007/s12517-019-5009-5; CHEN TT, 1984, CAN METALL QUART, V23, P349; Hartlieb P, 2016, MINER ENG, V91, P34, DOI 10.1016/j.mineng.2015.11.008; Hartlieb P, 2012, MINER ENG, V31, P82, DOI 10.1016/j.mineng.2012.01.011; Hassani F, 2016, J ROCK MECH GEOTECH, V8, P1, DOI 10.1016/j.jrmge.2015.10.004; Holland T, 2001, J PETRO…	27	0	0	12	12	SPRINGER HEIDELBERG	HEIDELBERG	TIERGARTENSTRASSE 17, D-69121 HEIDELBERG, GERMANY	2363-8419	2363-8427		GEOMECH GEOPHYS GEO	Geomech. Geophys. Geo-Energy Geo-Resour.	OCT 31	2020	6	4
J	Yao, QL; Xu, Q; Liu, JF; Zhu, L; Li, DW; Tang, CJ				Yao, Qiang-ling; Xu, Qiang; Liu, Jiang-feng; Zhu, Liu; Li, Dong-wei; Tang, Chuan-jin			Post-mining failure characteristics of rock surrounding coal seam roadway and evaluation of rock integrity: a case study	BULLETIN OF ENGINEERING GEOLOGY AND THE ENVIRONMENT			English	Article						Borehole imaging; Mining effect; Road support; Rock mass quality	EXCAVATION DAMAGED ZONE; GOB-SIDE ENTRY; BOREHOLE; PREDICTION; PARAMETERS; FRACTURES; TEXTURE; TUNNEL; MINE	Accurate knowledge of the distribution characteristics of structural planes in rocks is beneficial in the evaluation of rock mass quality and roadway support decision-making. In this study, in situ monitoring results were used to analyse the deformations and failure characteristics of the rock surrounding the main haulage roadway in the Huahong coal mine to establish a deformation and failure mod…	[Yao, Qiang-ling; Xu, Qiang; Zhu, Liu; Tang, Chuan-jin] Minist Educ, Key Lab Deep Coal Resource Min CUMT, Xuzhou 221008, Jiangsu, Peoples R China; [Yao, Qiang-ling; Xu, Qiang; Zhu, Liu; Tang, Chuan-jin] China Univ Min & Technol, Sch Mines, 1 Daxue Rd, Xuzhou 221116, Jiangsu, Peoples R China; [Liu, Jiang-feng] China Univ Min & Technol, State Key Lab GeoMech & Deep Underground Engn, Xuzhou 221116, …	Xu, Q (corresponding author), Minist Educ, Key Lab Deep Coal Resource Min CUMT, Xuzhou 221008, Jiangsu, Peoples R China.; Xu, Q (corresponding author), China Univ Min & Technol, Sch Mines, 1 Daxue Rd, Xuzhou 221116, Jiangsu, Peoples R China.	xuqiangck@cumt.edu.cn		Xu, Qiang/0000-0002-8407-5733	Fundamental Research Funds for the Central UniversitiesFundamental Research Funds for the Central Universities [2018XKQYMS10]	The research described in this paper was financially supported by the Fundamental Research Funds for the Central Universities (No. 2018XKQYMS10).	Al-Sit W, 2015, J APPL GEOPHYS, V119, P139, DOI 10.1016/j.jappgeo.2015.05.015; Bae DS, 2011, ROCK MECH ROCK ENG, V44, P497, DOI 10.1007/s00603-011-0134-9; Barton N., 1974, ROCK MECH, V6, P189, DOI [DOI 10.1007/BF01239496, 10.1007/bf01239496]; Bieniawski Z, 1973, CIV ENG S AFR, DOI 10.1016/0148-9062(74)90924-3; Bieniawski ZT, 1979, P 4 INT ROCK, P41; Cai M, 2004, INT J ROCK MECH MIN, V41, P3, DOI …	38	0	0	22	22	SPRINGER HEIDELBERG	HEIDELBERG	TIERGARTENSTRASSE 17, D-69121 HEIDELBERG, GERMANY	1435-9529	1435-9537		B ENG GEOL ENVIRON	Bull. Eng. Geol. Environ.	FEB	2021	80	2
J	Li, MJ; Du, MR; Wang, FM; Xue, BH; Zhang, C; Fang, HY				Li, Manjun; Du, Mingrui; Wang, Fuming; Xue, Binghan; Zhang, Chao; Fang, Hongyuan			Study on the mechanical properties of polyurethane (PU) grouting material of different geometric sizes under uniaxial compression	CONSTRUCTION AND BUILDING MATERIALS			English	Article						Polyurethane; Grouting material; Mechanical properties; Uniaxial compression; Geometric size	STRENGTH; CONCRETE; PERFORMANCE; BEHAVIOR; DISPERSION; FRACTURE; PARTICLE; ROCK	Polyurethane (PU) is increasingly adopted as grouting materials in the non-excavation rehabilitation of infrastructures. The compressive strength of PU materials is the key to achieving a desirable grouting effect. However, the geometric sizes of PU samples in the uniaxial compression test are not specified yet, which makes the test results less universal. Here, PU samples with a square cross-sec…	[Li, Manjun; Du, Mingrui; Wang, Fuming; Xue, Binghan; Zhang, Chao; Fang, Hongyuan] Zhengzhou Univ, Sch Water Conservancy Engn, 100 Sci Ave, Zhengzhou 450001, Henan, Peoples R China; [Li, Manjun; Du, Mingrui; Wang, Fuming; Xue, Binghan; Zhang, Chao; Fang, Hongyuan] Natl Local Joint Engn Lab Major Infrastruct Testi, Zhengzhou 450001, Peoples R China; [Li, Manjun; Du, Mingrui; Wang, Fuming; Xue, Bin…	Du, MR; Fang, HY (corresponding author), Zhengzhou Univ, Sch Water Conservancy Engn, 100 Sci Ave, Zhengzhou 450001, Henan, Peoples R China.	l475208404@gs.zzu.edu.cn; dumingruicumt@sina.com; fuming573@126.com; xuebinghan@zzu.edu.cn; chao.zhang.zzu@outlook.com; 18337192244@163.com			National Natural Science Foundation of ChinaNational Natural Science Foundation of China (NSFC) [51908515, 51704279, 51909242]; National Key Research and Development Program of China [2017YFC1501204]	The authors are grateful for the finical support from the National Natural Science Foundation of China (Grant No. 51908515, 51704279, 51909242), and the National Key Research and Development Program of China (Grant No. 2017YFC1501204).	[Anonymous], 2016, D16212016 ASTM; [Anonymous], 1999, 176711999 GBT; [Anonymous], 2008, 88132008 GBT; Azzoni A, 1996, ROCK MECH ROCK ENG, V29, P39, DOI 10.1007/BF01019938; BAZANT ZP, 1984, J ENG MECH-ASCE, V110, P518; Bazant ZP, 1999, ARCH APPL MECH, V69, P703, DOI 10.1007/s004190050252; Berra M, 2012, CONSTR BUILD MATER, V35, P666, DOI 10.1016/j.conbuildmat.2012.04.132; Bian X.C., 2013, CHIN J G…	62	0	0	10	21	ELSEVIER SCI LTD	OXFORD	THE BOULEVARD, LANGFORD LANE, KIDLINGTON, OXFORD OX5 1GB, OXON, ENGLAND	0950-0618	1879-0526		CONSTR BUILD MATER	Constr. Build. Mater.	OCT 30	2020	259
J	Zhao, HG; Liu, C; Huang, G; Yu, BC; Liu, YB; Song, ZL				Zhao, Honggang; Liu, Chao; Huang, Gun; Yu, Beichen; Liu, Yubing; Song, Zhenlong			Experimental investigation on rockburst process and failure characteristics in trapezoidal tunnel under different lateral stresses	CONSTRUCTION AND BUILDING MATERIALS			English	Article						Rockburst; Lateral stress; Localized damage; Rotation; V-shaped	CANADIAN GEOTECHNICAL COLLOQUIUM; EXPERIMENTAL SIMULATION; UNIAXIAL COMPRESSION; CRACK CLASSIFICATION; SPALLING FAILURE; BRITTLE ROCK; CONCRETE; FRACTURE; PREDICTION; EVOLUTION	In general, the in-situ stress increases with the increase of excavation depth, and it significantly affects the safe and long-term stability of tunnels and chambers. To study the influence of the in-situ stress on the rockburst process and failure characteristics, three different lateral stresses were loaded to perform biaxial compression experiments on sandstone specimens with a trapezoidal ope…	[Zhao, Honggang; Liu, Chao; Huang, Gun; Yu, Beichen; Liu, Yubing] Chongqing Univ, State Key Lab Coal Mine Disaster Dynam & Control, Chongqing 400030, Peoples R China; [Zhao, Honggang; Liu, Chao; Huang, Gun; Yu, Beichen; Liu, Yubing] Chongqing Univ, Coll Resource & Environm Sci, Chongqing 400030, Peoples R China; [Liu, Yubing] Curtin Univ, Dept Explorat Geophys, 26 Dick Perry Ave, Kensington, NSW …	Liu, C (corresponding author), Chongqing Univ, State Key Lab Coal Mine Disaster Dynam & Control, Chongqing 400030, Peoples R China.	cquliuchao@cqu.edu.cn		Liu, Chao/0000-0002-4213-7000	National Natural Science Foundation of ChinaNational Natural Science Foundation of China (NSFC) [51674049]; Graduate Research and Innovation Foundation of Chongqing [CYB19045, CYB19046, CYB19013, CYB18033]	This study was financially supported by the National Natural Science Foundation of China (51674049), the Graduate Research and Innovation Foundation of Chongqing (CYB19045, CYB19046, CYB19013, CYB18033).	Aggelis DG, 2011, MECH RES COMMUN, V38, P153, DOI 10.1016/j.mechrescom.2011.03.007; Aldandooh MAA, 2013, CONSTR BUILD MATER, V45, P282, DOI 10.1016/j.conbuildmat.2013.03.090; CARTER BJ, 1991, INT J NUMER ANAL MET, V15, P21, DOI 10.1002/nag.1610150103; Diederichs MS, 2007, CAN GEOTECH J, V44, P1082, DOI 10.1139/T07-033; Dzik EJ, 1996, INT J FRACTURE, V79, P49, DOI 10.1007/BF00017712; Eberhardt E, …	47	3	3	24	40	ELSEVIER SCI LTD	OXFORD	THE BOULEVARD, LANGFORD LANE, KIDLINGTON, OXFORD OX5 1GB, OXON, ENGLAND	0950-0618	1879-0526		CONSTR BUILD MATER	Constr. Build. Mater.	OCT 30	2020	259
J	Cao, KW; Khan, NM; Liu, W; Hussain, S; Zhu, YG; Cao, ZT; Bian, YC				Cao, K. W.; Khan, N. M.; Liu, W.; Hussain, S.; Zhu, Y. G.; Cao, Z. T.; Bian, Y. C.			Prediction Model of Dilatancy Stress Based on Brittle Rock: A Case Study of Sandstone	ARABIAN JOURNAL FOR SCIENCE AND ENGINEERING			English	Article						Dilatancy stress; Crack initiation stress; Artificial neural network based on a multilayer perceptron (ANN&#8211; MLP); Porosity (n); Elastic modulus (E)	UNIAXIAL COMPRESSIVE STRENGTH; NEURAL-NETWORK; MODULUS; POROSITY; ELASTICITY; CONCRETE; FRACTURE; FAILURE; MASSES	In this paper, the dilatancy stress and mechanical characterization of sandstone were evaluated under uniaxial loading at different elastic modulus and porosity conditions. The prediction model of dilatancy stress was established using a regression equation and an artificial neural network based on a multilayer perceptron (ANN-MLP). The results indicate that: (1) The rock crack initiation stress,…	[Cao, K. W.] China Univ Min & Technol, State Key Lab Geomech & Deep Underground Engn, Xuzhou 221116, Jiangsu, Peoples R China; [Khan, N. M.; Liu, W.] China Univ Min & Technol, State Key Lab Coal Resources & Mine Safety, Xuzhou 221116, Jiangsu, Peoples R China; [Khan, N. M.] Balochistan Univ Informat Technol Engn & Manageme, Dept Min Engn, Quetta, Pakistan; [Hussain, S.] Univ Engn & Technol, Dept …	Liu, W (corresponding author), China Univ Min & Technol, State Key Lab Coal Resources & Mine Safety, Xuzhou 221116, Jiangsu, Peoples R China.	1627621929@qq.com					Abiodun I, 2020, INT J COAL SCI TECHN; Al-Shayea NA, 2004, ENG GEOL, V74, P139, DOI 10.1016/j.enggeo.2004.03.007; Asteris PG, 2019, MECH ADV MATER STRUC, V26, P1146, DOI 10.1080/15376494.2018.1430874; Asteris PG, 2017, SENSORS-BASEL, V17, DOI 10.3390/s17061344; Asteris PG, 2017, NEURAL COMPUT APPL, V28, P2207, DOI 10.1007/s00521-016-2181-3; Atashi Hossein, 2019, International Journal of Coal Scie…	45	1	1	6	6	SPRINGER HEIDELBERG	HEIDELBERG	TIERGARTENSTRASSE 17, D-69121 HEIDELBERG, GERMANY	2193-567X	2191-4281		ARAB J SCI ENG	Arab. J. Sci. Eng.	MAR	2021	46	3
J	Zhang, Q; Wang, JQ; Guo, YM; Chen, Y; Sun, Q				Zhang, Qiang; Wang, Jiaqi; Guo, Yuming; Chen, Yang; Sun, Qiang			Study on deformation and stress evolution law of surrounding rock under repeated mining in close coal seam	ENERGY SOURCES PART A-RECOVERY UTILIZATION AND ENVIRONMENTAL EFFECTS			English	Article; Early Access						Close coal seam; repeated mining; up-down successive cooperative mining mode; stress evolution; surrounding rock control		Aimed at the problem that the mining roadway is seriously affected by the repeated mining under the up-down successive cooperative mining mode, this paper takes Qiuci Coal Mine as the research background. Based on analysis of mining influence stage of A502 haulage roadway, the stress evolution and deformation law of surrounding rock of roadway are analyzed through similar simulation, the principl…	[Zhang, Qiang; Wang, Jiaqi; Guo, Yuming; Sun, Qiang] China Univ Min & Technol, Sch Mines, Xuzhou 221116, Jiangsu, Peoples R China; [Chen, Yang] China Univ Min & Technol, State Key Lab Coal Resources & Safe Min, Xuzhou, Jiangsu, Peoples R China	Wang, JQ (corresponding author), China Univ Min & Technol, Sch Mines, Xuzhou 221116, Jiangsu, Peoples R China.	13852037975@163.com			National Natural Science Foundation of ChinaNational Natural Science Foundation of China (NSFC) [51704273]	The authors gratefully acknowledge the financial support for this work. This work was supported by National Natural Science Foundation of China (51704273).	Ariman T., 1967, ACTA MECH, V4, P216, DOI [10.1007/BF01178569, DOI 10.1007/BF01178569]; Chong L, 2012, INT J MIN SCI TECHNO, V22, P23, DOI 10.1016/j.ijmst.2011.06.002; Cui ZM, 2017, AIP CONF PROC, V1820, DOI 10.1063/1.4977275; Dong FT, 1994, J CHINA COAL SOC, V19, P21, DOI DOI 10.13225/J.CNKI.JCCS.1994.01.004; FAN Q, 2011, MINING SCI TECHNOLOG, V29, DOI DOI 10.1016/J.MSTC.2011.06.012; Fengjing L,…	23	0	0	20	20	TAYLOR & FRANCIS INC	PHILADELPHIA	530 WALNUT STREET, STE 850, PHILADELPHIA, PA 19106 USA	1556-7036	1556-7230		ENERG SOURCE PART A	Energy Sources Part A-Recovery Util. Environ. Eff.
J	Gao, LS; Wang, YP; Zhang, EH; Cheng, L; Peng, R				Gao, Linsheng; Wang, Yueping; Zhang, Er-hui; Cheng, Liang; Peng, Rui			A Discussion of Stability and Engineering Verification of Thin Immediate Roof under Uniform Load of the Rectangular Coal Roadway	ADVANCES IN CIVIL ENGINEERING			English	Article								Roadway roof is a key factor in roadway stability. At present, the analysis of roof stability is mainly based on numerical calculations and field measurements with a relatively weak theoretical basis and inadequate research studies on the loading mechanism of the roof. In this paper, a mechanical calculation model of immediate direct roof under uniform load of rectangular coal roadway is establis…	[Gao, Linsheng] Xian Univ Sci & Technol, Sch Mineral Engn, Xian 710054, Shanxi, Peoples R China; [Gao, Linsheng; Wang, Yueping; Zhang, Er-hui; Peng, Rui] North China Inst Sci & Technol, Sch Safety Engn, Beijing 101601, Peoples R China; [Cheng, Liang] Zhongshan Haofa Real Estate Dev Co Ltd, Guangzhou 528400, Peoples R China	Wang, YP (corresponding author), North China Inst Sci & Technol, Sch Safety Engn, Beijing 101601, Peoples R China.	ypwang@ncist.edu.cn			National Natural Science Foundation of ChinaNational Natural Science Foundation of China (NSFC) [51674119, 51804119, 51874133]	This research was supported by the National Natural Science Foundation of China (Grant nos. 51674119, 51804119 and 51874133).	Bastola S., 2015, P ISRM 2015 MONTR CA; Carranza-Torres C, 2009, ROCK MECH ROCK ENG, V42, P175, DOI 10.1007/s00603-009-0178-2; [陈士林 Chen Shilin], 2005, [岩石力学与工程学报, Chinese Journal of Rock Mechanics and Engineering], V24, P2203; China University of Mining and Technology, 2018, CHENG L STRUCT CHAR; Chugh Y. P., 2015, P 49 US ROCK MECH GE; Kang HP, 2017, ROCK MECH ROCK ENG, V50, P387, DOI 10.1007/s0…	20	0	0	1	1	HINDAWI LTD	LONDON	ADAM HOUSE, 3RD FLR, 1 FITZROY SQ, LONDON, W1T 5HF, ENGLAND	1687-8086	1687-8094		ADV CIV ENG	Adv. Civ. Eng.	OCT 28	2020	2020
J	Chen, J; Jiang, Q; Hu, YR; Qin, WM; Li, SJ; Xiong, J				Chen, Jing; Jiang, Quan; Hu, Yanran; Qin, Weimin; Li, Shaojun; Xiong, Jun			Time-dependent performance of damaged marble and corresponding fractional order creep constitutive model	ARABIAN JOURNAL OF GEOSCIENCES			English	Article						Initial damage; Creep test; Fractional derivatives; Damage variables; Creep model	ROCK; BEHAVIOR; SANDSTONE; EVOLUTION; DISPLACEMENT; CALCULUS; COAL	The time-dependent behaviour of a rock mass is crucial to the long-term stability of underground engineering projects, such as large tunnels, caverns and roadways. This paper focused on the experimental and theoretical studies of marble creep behaviour considering its initial damage due to excavation damage. Based on the onsite investigation of the creep performance of Jinping marble, detailed cr…	[Chen, Jing; Hu, Yanran] Tongling Univ, Sch Architectural Engn, Tongling 244061, Anhui, Peoples R China; [Jiang, Quan; Qin, Weimin; Li, Shaojun] Chinese Acad Sci, Inst Rock & Soil Mech, State Key Lab Geomech & Geotech Engn, Wuhan 430071, Peoples R China; [Xiong, Jun] Univ Alberta, Dept Civil & Environm Engn, Edmonton, AB T6G 2W2, Canada	Jiang, Q (corresponding author), Chinese Acad Sci, Inst Rock & Soil Mech, State Key Lab Geomech & Geotech Engn, Wuhan 430071, Peoples R China.	qjiang@whrsm.ac.cn			National Natural Science Foundation of ChinaNational Natural Science Foundation of China (NSFC) [U1765206, 41672314]; Anhui Province Natural Science FoundationNatural Science Foundation of Anhui Province [1508085QE101]	The authors received the financial supports from the National Natural Science Foundation of China (Grant No. U1765206 and No. 41672314) and Anhui Province Natural Science Foundation (No. 1508085QE101).	BAGLEY RL, 1983, J RHEOL, V27, P201, DOI 10.1122/1.549724; Bian K, 2019, ROCK MECH ROCK ENG, V52, P97, DOI 10.1007/s00603-018-1580-4; Brady BHG, 1985, ROCK MECH UNDERGROUN; Cai TT, 2018, ARAB J GEOSCI, V11, DOI 10.1007/s12517-018-4012-6; Chen J, 2013, TIME DEPENDENT DEFOR; [陈静 Chen Jing], 2019, [煤炭学报, Journal of China Coal Society], V44, P1446; Chen LW, 2017, ARAB J GEOSCI, V10, DOI 10.1007/s1251…	51	0	0	10	10	SPRINGER HEIDELBERG	HEIDELBERG	TIERGARTENSTRASSE 17, D-69121 HEIDELBERG, GERMANY	1866-7511	1866-7538		ARAB J GEOSCI	Arab. J. Geosci.	OCT 28	2020	13	21
J	Fan, BJ; Zhao, FJ; Wang, B; Wu, QH; Zhang, ZT				Fan, Baojie; Zhao, Fujun; Wang, Bin; Wu, Qiuhong; Zhang, Zongtang			Rockburst Occurrence Mechanism Based on the Self-Sustaining Time-Varying Structure of Surrounding Rock	SHOCK AND VIBRATION			English	Article							BURST; ENERGY; PREVENTION	Rockburst is one of the major disasters that threaten the safety of personnel and equipment underground and affect the normal production of the system. At present, there are many kinds of research on rockburst occurrence mechanisms, but most of them are based on statics and do not consider the time-varying effect of surrounding rock state. Regarding the stress state and characteristics changing w…	[Fan, Baojie; Zhao, Fujun; Wang, Bin; Wu, Qiuhong; Zhang, Zongtang] Hunan Univ Sci & Technol, Sch Resource & Environm & Safety Engn, Xiangtan 411201, Hunan, Peoples R China; [Fan, Baojie] Hunan Geol Mineral Explorat & Dev Bur, Geol Team 414, Yiyang 41300, Hunan, Peoples R China	Wang, B (corresponding author), Hunan Univ Sci & Technol, Sch Resource & Environm & Safety Engn, Xiangtan 411201, Hunan, Peoples R China.	wangbin@hnust.edu.cn			National Natural Science Foundation of ChinaNational Natural Science Foundation of China (NSFC) [51674116, 51474103, 51904101]; Natural Science Foundation of Hunan ProvinceNatural Science Foundation of Hunan Province [2020JJ4311, 2020JJ5188]	The work was supported by the National Natural Science Foundation of China (Grant nos. 51674116, 51474103, and 51904101) and Natural Science Foundation of Hunan Province (Grant nos. 2020JJ4311 and 2020JJ5188). This support is gratefully acknowledged.	Blake W., 1972, Quarterly of the Colorado School of Mines, V67, P1; Chen GX, 2012, PROCEDIA ENGINEER, V45, P904, DOI 10.1016/j.proeng.2012.08.257; Chen X., 2002, J LIAONING TECHNICAL, V21, P261; DOU L M, 2009, MINING SCI TECHNOLOG, V19, P585, DOI DOI 10.1016/s1674-5264(09)60109-5; Dou LM, 2018, INT J MIN SCI TECHNO, V28, P767, DOI 10.1016/j.ijmst.2018.08.007; Faliang H., 1992, P 3 NAT C ROCK DYN …	63	0	0	4	4	HINDAWI LTD	LONDON	ADAM HOUSE, 3RD FLR, 1 FITZROY SQ, LONDON, W1T 5HF, ENGLAND	1070-9622	1875-9203		SHOCK VIB	Shock Vib.	OCT 27	2020	2020
J	Li, B; Ding, QF; Xu, NW; Lei, YF; Xu, Y; Zhu, ZP; Liu, JF				Li, Biao; Ding, Quan-fu; Xu, Nu-wen; Lei, Yi-fan; Xu, Yuan; Zhu, Zhong-ping; Liu, Jing-fei			Mechanical response and stability analysis of rock mass in high geostress underground powerhouse caverns subjected to excavation	JOURNAL OF CENTRAL SOUTH UNIVERSITY			English	Article						high geostress; underground powerhouse caverns; microseismic monitoring; discrete element modelling; stability analysis; &#39640; &#22320; &#24212; &#21147; &#22320; &#19979; &#21378; &#25151; &#27934; &#23460; &#32676; &#24494; &#38663; &#30417; &#27979; &#31163; &#25955; &#20803; &#27169; &#25311; &#31283; &#23450; &#24615; &#20998; &#26512	ROCKBURST DEVELOPMENT PROCESSES; HOUZIYAN HYDROPOWER STATION; SURROUNDING ROCK; DEEP TUNNELS; DEFORMATION; STRESS; FAILURE; DAMAGE; ZONE; DISPLACEMENT	To investigate the stability of rock mass in high geostress underground powerhouse caverns subjected to excavation, a microseismic (MS) monitoring system was established and the discrete element method (DEM)-based numerical simulation was carried out. The tempo-spatial damage characteristics of rock mass were analyzed. The evolution laws of MS source parameters during the formation of a rock coll…	[Li, Biao; Ding, Quan-fu] Southwest Petr Univ, Sch Geosci & Technol, Chengdu 610500, Peoples R China; [Xu, Nu-wen; Lei, Yi-fan] Sichuan Univ, Coll Water Resource & Hydropower, State Key Lab Hydraul & Mt River Engn, Chengdu 610065, Peoples R China; [Xu, Yuan] Univ Oxford, Dept Engn Sci, Oxford OX5 1PF, England; [Zhu, Zhong-ping] Sichuan Dadu River Shuangjiangkou Hydropower Dev, Maerkang 624099, Pe…	Xu, NW (corresponding author), Sichuan Univ, Coll Water Resource & Hydropower, State Key Lab Hydraul & Mt River Engn, Chengdu 610065, Peoples R China.	xunuwen@scu.edu.cn			National Key R&D Program of China [2017YFC1501100]; National Natural Science Foundation of ChinaNational Natural Science Foundation of China (NSFC) [51809221, 51679158]	Project (2017YFC1501100) supported by the National Key R&D Program of China; Projects (51809221, 51679158) supported by the National Natural Science Foundation of China	Alejano LR, 1999, INT J ROCK MECH MIN, V36, P475, DOI 10.1016/S0148-9062(99)00022-4; Andersson JC, 2009, INT J ROCK MECH MIN, V46, P865, DOI 10.1016/j.ijrmms.2009.02.010; BOATWRIGHT J, 1984, B SEISMOL SOC AM, V74, P361; Cai M, 2007, INT J ROCK MECH MIN, V44, P550, DOI 10.1016/j.ijrmms.2006.09.013; Cai M, 1998, PURE APPL GEOPHYS, V153, P67, DOI 10.1007/s000240050185; Cai M, 2001, INT J ROCK MECH M…	41	0	0	15	15	JOURNAL OF CENTRAL SOUTH UNIV	HUNAN	EDITORIAL OFF, CHANGSHA, CHINA MAINLAND, HUNAN 410083, PEOPLES R CHINA	2095-2899	2227-5223		J CENT SOUTH UNIV	J. Cent. South Univ.	OCT	2020	27	10			SI
J	Yang, HY; Liu, YB; Li, Y; Pan, RK; Wang, H; Luo, F; Wang, HY; Cao, SG				Yang, Hongyun; Liu, Yanbao; Li, Yong; Pan, Ruikai; Wang, Hui; Luo, Feng; Wang, Haiyang; Cao, Shugang			Research on the support of larger broken gateway based on the combined arch theory	GEOMECHANICS AND ENGINEERING			English	Article						large EBZ; combined arch; high pretension force; extensible anchorage; initial load-bearing zone	EXCAVATION DAMAGED ZONE; ROCK BOLTS; GPR EVALUATION; FAILURE; MODEL; COAL; PROPAGATION; MECHANISM; CONCRETE; TUNNELS	The excavation broken zones (EBZ) of gateways is a significant factor in determining the stability of man-made opening. The EBZ of 55 gateways with variety geological conditions were measured using Ground Penetrating Radar (GPR). The results found that the greatly depth of EBZ, the smallest is 1.5 m and the deepest is 3.5 m. Experimental investigations were carried out in the laboratory and in th…	[Yang, Hongyun; Wang, Haiyang] Chongqing Jiaotong Univ, State Key Lab Mt Bridge & Tunnel Engn, Chongqing 400074, Peoples R China; [Yang, Hongyun; Li, Yong; Pan, Ruikai; Wang, Hui; Cao, Shugang] Chongqing Univ, State Key Lab Coal Mine Disaster Dynam & Control, Chongqing 400044, Peoples R China; [Liu, Yanbao] Chongqing Res Inst, China Coal Technol Engn Grp, Chongqing 400039, Peoples R China; [Luo, …	Yang, HY (corresponding author), Chongqing Jiaotong Univ, State Key Lab Mt Bridge & Tunnel Engn, Chongqing 400074, Peoples R China.; Yang, HY; Li, Y (corresponding author), Chongqing Univ, State Key Lab Coal Mine Disaster Dynam & Control, Chongqing 400044, Peoples R China.	yanghy@cqu.edu.cn; yong.li@cqu.edu.cn			National Natural Science Foundation Project of ChinaNational Natural Science Foundation of China (NSFC) [51904043, 51804093, 51774059, 51804058]; Chongqing Technological Innovation and Application Demonstration Project [cstc2018jscx-msybX0067]; Science and Technology Research Program of Chongqing Municipal Education Commission [KJQN201800729]; Scientific Research Foundation of State Key Lab [2011…	The authors gratefully acknowledge funding by National Natural Science Foundation Project of China (51904043, 51804093, 51774059, 51804058), Chongqing Technological Innovation and Application Demonstration Project (cstc2018jscx-msybX0067), Science and Technology Research Program of Chongqing Municipal Education Commission (KJQN201800729), Scientific Research Foundation of State Key Lab. of Coal M…	Carranza-Torres C, 2009, ROCK MECH ROCK ENG, V42, P175, DOI 10.1007/s00603-009-0178-2; [丁秀丽 Ding Xiuli], 2002, [岩石力学与工程学报, Chinese Journal of Rock Mechanics and Engineering], V21, P980; Dong FT, 1994, J CHINA COAL SOC, V19, P21, DOI DOI 10.13225/J.CNKI.JCCS.1994.01.004; Gu J., 2000, CHINESE J ROCK ME S1, VS1, P917; Gu R, 2015, COMPUT GEOTECH, V63, P171, DOI 10.1016/j.compgeo.2014.08.013; Guo XQ, …	47	0	0	17	30	TECHNO-PRESS	DAEJEON	PO BOX 33, YUSEONG, DAEJEON 305-600, SOUTH KOREA	2005-307X	2092-6219		GEOMECH ENG	Geomech. Eng.	OCT 25	2020	23	2
J	Soomro, MA; Mangi, N; Cheng, WC; Mangnejo, DA				Soomro, Mukhtiar Ali; Mangi, Naeem; Cheng, Wen-Chieh; Mangnejo, Dildar Ali			The Effects of Multipropped Deep Excavation-Induced Ground Movements on Adjacent High-Rise Building Founded on Piled Raft in Sand	ADVANCES IN CIVIL ENGINEERING			English	Article							MECHANICAL-BEHAVIOR; MODEL TEST; STIFFNESS; RESPONSES; TESTS; ROCK	In this paper, a three-dimensional numerical parametric study was conducted to predict the deformation mechanism of a 20-storey building sitting on a (4 x 4) piled raft to an adjacent 25 m deep basement excavation. The influences of different excavation depths were investigated. An advanced hypoplastic sand model (which is capable of taking small-strain stiffness into account) was adopted to capt…	[Soomro, Mukhtiar Ali; Mangi, Naeem] Quaid E Awam Univ Engn, Dept Civil Engn, Nawabshah, Sindh, Pakistan; [Cheng, Wen-Chieh] Xian Univ Architecture & Technol, Sch Civil Engn, Xian 710055, Peoples R China; [Mangnejo, Dildar Ali] Mehran Univ Engn & Technol, Dept Civil Engn, Shaheed Zulfiqar Ali Bhutto Campus, Khairpur Mirs, Pakistan	Soomro, MA (corresponding author), Quaid E Awam Univ Engn, Dept Civil Engn, Nawabshah, Sindh, Pakistan.	eng.soomro@gmail.com			Quaid-e-Awam University of Engineering, Science & Technology, Sindh, Pakistan	The authors would like to acknowledge the financial support provided by the Quaid-e-Awam University of Engineering, Science & Technology, Sindh, Pakistan.	ATKINSON JH, 1990, GEOTECHNIQUE, V40, P531, DOI 10.1680/geot.1990.40.4.531; Boone SJ, 1999, CAN GEOTECH J, V36, P210, DOI 10.1139/cgj-36-2-210; Burland J, 2012, ICE MANUAL GEOTECHNI, VII, P733; Cheng WC, 2020, TUNN UNDERGR SP TECH, V96, DOI 10.1016/j.tust.2019.103178; Cheng WC, 2019, TUNN UNDERGR SP TECH, V91, DOI 10.1016/j.tust.2019.102991; Cheng WC, 2019, B ENG GEOL ENVIRON, V78, P2933, DOI 10.…	43	0	0	0	0	HINDAWI LTD	LONDON	ADAM HOUSE, 3RD FLR, 1 FITZROY SQ, LONDON, W1T 5HF, ENGLAND	1687-8086	1687-8094		ADV CIV ENG	Adv. Civ. Eng.	OCT 24	2020	2020
J	Lu, ZG; Zeng, QL; Liu, ZH; Gao, GS; Zhong, PS				Lu, Zhenguo; Zeng, Qingliang; Liu, Zhihai; Gao, Guanshun; Zhong, Peisi			Research on Cutting Characteristics of Rock Plate with Two Sides Fixed and Two Sides Free	ADVANCES IN MATERIALS SCIENCE AND ENGINEERING			English	Article							FAILURE MODE TRANSITION; NUMERICAL-SIMULATION; CONICAL PICKS; PREDICTION; PARAMETERS; ENERGY; FORCE	Conical pick wear is an urgent problem in the roadway excavation caused by hard rock difficult to break. The traditional method of increasing cutting power to improve cutting performance of conical pick significantly increases pick wear. In the paper, a saw blade and conical pick combined cutting method is proposed based on increased free surface. To research the fracture morphology and cutting f…	[Lu, Zhenguo; Liu, Zhihai] Shandong Univ Sci & Technol, Coll Transportat, Qingdao 266590, Peoples R China; [Zeng, Qingliang; Gao, Guanshun; Zhong, Peisi] Shandong Univ Sci & Technol, Coll Mech & Elect Engn, Qingdao 266590, Peoples R China; [Zeng, Qingliang] Shandong Normal Univ, Coll Informat Sci & Engn, Jinan 250358, Peoples R China; [Zhong, Peisi] Shandong Univ Sci & Technol, Adv Mfg Technol Ct…	Liu, ZH (corresponding author), Shandong Univ Sci & Technol, Coll Transportat, Qingdao 266590, Peoples R China.	zhihliu@sdust.edu.cn		Zeng, Qingliang/0000-0002-3842-9107; Zhenguo, Lu/0000-0003-4754-7313; Gao, Guanshun/0000-0002-0809-6583; Liu, Zhihai/0000-0003-0764-4282	Natural Science Foundation of Shandong ProvinceNatural Science Foundation of Shandong Province [ZR2019BEE069, ZR2019MEE067]; Key Research and Development Plan of Shandong Province [2019GGX104102]	This work was supported by the Natural Science Foundation of Shandong Province (Grant nos. ZR2019BEE069 and ZR2019MEE067) and the Key Research and Development Plan of Shandong Province (Grant no. 2019GGX104102).	Bilgin N, 2006, INT J ROCK MECH MIN, V43, P139, DOI 10.1016/j.ijrmms.2005.04.009; Dewangan S, 2015, ROCK MECH ROCK ENG, V48, P2129, DOI 10.1007/s00603-014-0680-z; EVANS I, 1984, INT J MINING ENG, V2, P63, DOI 10.1007/BF00880858; Goktan RM, 2005, J S AFR I MIN METALL, V105, P257; Goktan RM, 1997, P 4 INT S MIN MECH A, P57; He XQ, 2017, TUNN UNDERGR SP TECH, V63, P95, DOI 10.1016/j.tust.2016.12.012…	32	0	0	4	4	HINDAWI LTD	LONDON	ADAM HOUSE, 3RD FLR, 1 FITZROY SQ, LONDON, W1T 5HF, ENGLAND	1687-8434	1687-8442		ADV MATER SCI ENG	Adv. Mater. Sci. Eng.	OCT 24	2020	2020
J	Wang, X; Wu, N; Li, H; Yan, YT				Wang, Xiao; Wu, Na; Li, Hong; Yan, Yatao			Influence of joint angle on the instability failure characteristics and AE evolution law of underground caverns	EUROPEAN JOURNAL OF ENVIRONMENTAL AND CIVIL ENGINEERING			English	Article; Early Access						Underground caverns; joint angle; failure behaviours; AE characteristics; damage evolution rules	ACOUSTIC-EMISSION CHARACTERISTICS; ROCK MASS; MECHANICAL-PROPERTIES; STRESS; STRENGTH; EXCAVATION; SIMULATION; SPECIMENS; TUNNELS	The existence of joints is the key factor for the instability of underground caverns. In this paper, the instability failure behaviours, acoustic emission (AE) characteristics and damage evolution rules of green sandstone caverns with different joint angles were investigated. First, the influences of joint angles on the strength and failure behaviour of the caverns were analysed. Then, the AE cha…	[Wang, Xiao; Yan, Yatao] Southeast Univ, Sch Civil Engn, Nanjing, Peoples R China; [Wu, Na; Li, Hong] Dalian Univ Technol, State Key Lab Coastal & Offshore Engn, Dalian 116024, Peoples R China	Wu, N (corresponding author), Dalian Univ Technol, State Key Lab Coastal & Offshore Engn, Dalian 116024, Peoples R China.	wuna0306@mail.dlut.edu.cn		WU, Na/0000-0002-3859-1526	Postgraduate Research & Practice Innovation Program of Jiangsu Province [KYCX19_0094]; National Natural Science Foundation of China (NSFC)National Natural Science Foundation of China (NSFC) [41941018]; Guangdong Basic and Applied Basic Research Foundation [2019A1515110836]; Fundamental Research Funds for the Central UniversitiesFundamental Research Funds for the Central Universities [DUT20GJ204]	The research was supported by the Postgraduate Research & Practice Innovation Program of Jiangsu Province (No. KYCX19_0094), the National Natural Science Foundation of China (NSFC) (41941018), Guangdong Basic and Applied Basic Research Foundation (2019A1515110836) and the Fundamental Research Funds for the Central Universities (DUT20GJ204).	Asadizadeh M, 2018, ROCK MECH ROCK ENG, V51, P415, DOI 10.1007/s00603-017-1328-6; Bahaaddini M, 2013, COMPUT GEOTECH, V49, P206, DOI 10.1016/j.compgeo.2012.10.012; Behnia M, 2014, ARAB J GEOSCI, V7, P2729, DOI 10.1007/s12517-013-0885-6; Falls SD, 1998, TECTONOPHYSICS, V289, P1, DOI 10.1016/S0040-1951(97)00303-X; Han ZY, 2020, INT J ROCK MECH MIN, V131, DOI 10.1016/j.ijrmms.2020.104352; Huang F, 2…	28	1	1	7	7	TAYLOR & FRANCIS LTD	ABINGDON	2-4 PARK SQUARE, MILTON PARK, ABINGDON OR14 4RN, OXON, ENGLAND	1964-8189	2116-7214		EUR J ENVIRON CIV EN	Eur. J. Environ. Civ. Eng.
J	Voit, K; Murr, R; Cordes, T; Zeman, O; Bergmeister, K				Voit, Klaus; Murr, Roland; Cordes, Tobias; Zeman, Oliver; Bergmeister, Konrad			Tunnel spoil recycling for concrete production at the Brenner Base tunnel in Austria	STRUCTURAL CONCRETE			English	Article						aggregate for concrete; aggregate substitute; Brenner Base tunnel; Bundner schists; calcareous schists; excavation material recycling; material management; quartz phyllite; tunnel spoil		In the construction of major tunnel structures, large quantities of rock material are generated by the excavation of, for example, tunnels or caverns out of the in situ rock mass. Excavated rock material was often considered as undesired by-product and from a legal point of view as waste in the past. Nevertheless, there is the need for construction material at the tunnel construction site directl…	[Voit, Klaus] Univ Nat Resources & Life Sci, Inst Appl Geol, Dept Civil Engn & Nat Hazards, Vienna, Austria; [Murr, Roland; Cordes, Tobias] Brenner Basistunnel BBT SE, Innsbruck, Austria; [Zeman, Oliver; Bergmeister, Konrad] Univ Nat Resources & Life Sci, Inst Struct Engn, Dept Civil Engn & Nat Hazards, Vienna, Austria	Zeman, O (corresponding author), Univ Nat Resources & Life Sci, Inst Struct Engn, Peter Jordan Str 82, A-1190 Vienna, Austria.	oliver.zeman@boku.ac.at					[Anonymous], 2019, 13791 ONORM EN AUSTR; [Anonymous], 2015, 199211 ONORM EN AUST; [Anonymous], DRAGON; [Anonymous], 2010, 23303 ONR AUSTR STAN; [Anonymous], 2019, 21 ITA; [Anonymous], 2017, 206 ONORM EN; [Anonymous], 2011, B3592 ONORM AUSTR ST; Bellopede Rossana, 2011, American Journal of Environmental Sciences, V7, P338, DOI 10.3844/ajessp.2011.338.347; Bellopede R, 2011, PHYSICOCHEM PROBL MI, V…	41	0	0	4	4	ERNST & SOHN	BERLIN	ROTHERSTRASSE 21, BERLIN, DEUTSCHLAND 10245, GERMANY	1464-4177	1751-7648		STRUCT CONCRETE	Struct. Concr.	DEC	2020	21	6
J	Nguyen, TS; Li, Z; Le, DA				Nguyen, T. S.; Li, Z.; Le, D. A.			Constitutive model development and field simulation of excavation damage in bedded argillaceous rock	EUROPEAN JOURNAL OF ENVIRONMENTAL AND CIVIL ENGINEERING			English	Article; Early Access						Sedimentary rock; constitutive model; hydromechanical coupling; excavation damage; anisotropic elastoplasticity	HYDROMECHANICAL BEHAVIOR; CLAY-ROCKS; IN-SITU; TOURNEMIRE; TIME; LOCALIZATION; PROPAGATION; PROJECT; CRACKS; FAULT	Argillaceous rocks are candidate host and/or cap formations for the geological disposal of nuclear wastes in many countries, including Canada, France and Switzerland. The understanding of the long term mechanical behaviour of such rocks is an essential requirement for the assessment of their performance as a barrier against radionuclide migration. Due to the existence of bedding, argillaceous roc…	[Nguyen, T. S.] Canadian Nucl Safety Commiss, 280 Slater St, Ottawa, ON K1P 5S9, Canada; [Li, Z.] Airy3D, Montreal, PQ, Canada; [Le, D. A.] Gen Motors Co, Detroit, MI USA	Nguyen, TS (corresponding author), Canadian Nucl Safety Commiss, 280 Slater St, Ottawa, ON K1P 5S9, Canada.	son.nguyen@canada.ca			CNSC	Special thanks to CNSC for the financial support of this study, to IRSN for providing the rock samples and Canmet Laboratories for performing the triaxial tests on these samples.	Abdi H, 2015, CAN GEOTECH J, V52, P268, DOI 10.1139/cgj-2013-0122; Agence National des Dechets Radioactifs (ANDRA), 2016, DOSS OPT SUR PART AP; Boisson JY, 2001, HYDROGEOL J, V9, P108, DOI 10.1007/s100400000119; Bossart P, 2004, APPL CLAY SCI, V26, P429, DOI 10.1016/j.clay.2003.12.018; Bossart P., 2003, REPORTS FEDERAL OFFI, V4, P65; Bretaudeau F, 2014, GEOPHYSICS, V79, pB1, DOI 10.1190/GEO2013-0…	40	0	0	6	11	TAYLOR & FRANCIS LTD	ABINGDON	2-4 PARK SQUARE, MILTON PARK, ABINGDON OR14 4RN, OXON, ENGLAND	1964-8189	2116-7214		EUR J ENVIRON CIV EN	Eur. J. Environ. Civ. Eng.
J	Zhao, GM; Liu, CY; Kao, SM; Zhang, XB; Cheng, X				Zhao, Guangming; Liu, Chongyan; Kao, Siming; Zhang, Xiaobo; Cheng, Xiang			Stress and load-bearing structure analysis of the surrounding rock in a soft broken roadway	ARABIAN JOURNAL OF GEOSCIENCES			English	Article						Elasto-plastic analysis; Strain-softening; Deep and shallow bearing structures; Excavation damaged zone	ELASTOPLASTIC ANALYSIS; CIRCULAR TUNNEL; DILATANCY ANGLE; MASS; STRENGTH	After roadway excavation, the surrounding rock is the main bearing structure for the original stress and forms a supporting ring with the supporting structure. The automatic load-bearing ring is the main interactional structure between the surrounding rock and the supporting system. The rock mass strength, stress, and deformation characteristics were considered to establish the theoretical calcul…	[Zhao, Guangming; Liu, Chongyan; Kao, Siming; Cheng, Xiang] Anhui Univ Sci & Technol, State Key Lab Min Response & Disaster Prevent & C, Huainan 232001, Peoples R China; [Zhang, Xiaobo] Nanchang Univ, Sch Civil Engn & Architecture, Nanchang 330031, Jiangxi, Peoples R China	Liu, CY (corresponding author), Anhui Univ Sci & Technol, State Key Lab Min Response & Disaster Prevent & C, Huainan 232001, Peoples R China.	guangmingzhao@163.com; chongyanliu@126.com			National Key Research and Development plan [2017YFC0603000]; National Natural Science Foundation of ChinaNational Natural Science Foundation of China (NSFC) [51374013, 51674008]; Excellence Talent Training Program of High School [gxbjZD2016051]; Innovation Team Construction Project of Anhui High School Research Platform; Academic Research Activity Foundation for Academic and Technical Leaders and…	This work is financially supported by the National Key Research and Development plan (2017YFC0603000), National Natural Science Foundation of China (No. 51374013, No. 51674008), Excellence Talent Training Program of High School (No. gxbjZD2016051), Innovation Team Construction Project of Anhui High School Research Platform, and Academic Research Activity Foundation for Academic and Technical Lead…	Alejano LR, 2005, INT J ROCK MECH MIN, V42, P481, DOI 10.1016/j.ijrmms.2005.01.003; Alonso E, 2003, INT J NUMER ANAL MET, V27, P1153, DOI 10.1002/nag.315; Carranzatorres C, 2002, P 5 N AM ROCK MECH S, P283; Cheng C, 2016, ENG GEOL, V213, P25, DOI 10.1016/j.enggeo.2016.08.010; Cui L, 2017, ENG GEOL, V224, P43, DOI 10.1016/j.enggeo.2017.04.022; Fahimifar A, 2010, P I CIVIL ENG-GEOTEC, V163, P37, DO…	30	1	1	16	16	SPRINGER HEIDELBERG	HEIDELBERG	TIERGARTENSTRASSE 17, D-69121 HEIDELBERG, GERMANY	1866-7511	1866-7538		ARAB J GEOSCI	Arab. J. Geosci.	OCT 22	2020	13	21
J	Yao, KAF; Yao, BK; Belcourt, O; Salze, D; Lasm, T; Lopez-Ferber, M; Junqua, G				Yao, Kouadio Assemien Francois; Yao, Blaise Koffi; Belcourt, Olivier; Salze, David; Lasm, Theophile; Lopez-Ferber, Miguel; Junqua, Guillaume			Mining Impacts Assessment Using the LCA Methodology: Case Study of Afema Gold Mine in Ivory Coast	INTEGRATED ENVIRONMENTAL ASSESSMENT AND MANAGEMENT			English	Article						Mining industry; Life cycle assessment; Environmental impact assessment; On-site impacts; Off-site impacts	LIFE-CYCLE ASSESSMENT; ENVIRONMENTAL-IMPACT; FRAMEWORK; IMPLEMENTATION; MANAGEMENT; FOOTPRINT; EVALUATE; METAL; EIA	Environmental impact assessment studies are mandatory for major industrial or infrastructure projects in most countries. These studies are usually limited to on-site impacts during exploitation but do not consider indirect impacts generated off-site or those concerning other steps of the project, including dismantling. National regulations in various countries have recently begun to include these…	[Yao, Kouadio Assemien Francois; Belcourt, Olivier; Salze, David; Lopez-Ferber, Miguel; Junqua, Guillaume] Univ Montpellier, IMT Mines Ales, LGEI, Ales, France; [Yao, Kouadio Assemien Francois; Yao, Blaise Koffi; Lasm, Theophile] Univ Felix Houphouet Boigny, UFR STRM, Abidjan, Cote Ivoire	Yao, KAF (corresponding author), Univ Montpellier, IMT Mines Ales, LGEI, Ales, France.; Yao, KAF (corresponding author), Univ Felix Houphouet Boigny, UFR STRM, Abidjan, Cote Ivoire.	kouadioyao.assemien@gmail.com			IMT Mines Ales (France); UFR STRM of the Universite Felix Houphouet-Boigny (Ivory Coast)	This research has been supported by IMT Mines Ales (France) and the UFR STRM of the Universite Felix Houphouet-Boigny (Ivory Coast). The authors thank the members of the ELSA research group (Environmental Life Cycle and Sustainability Assessment, ) for their advice.	Alyaseri I, 2017, HELIYON, V3, DOI 10.1016/j.heliyon.2017.e00268; [Anonymous], 2006, 140402006 ISO; Assie KE, 2008, THESIS; Awuah-Offei K, 2009, CIM B, V102, P59; Awuah-Offei K, 2011, INT J LIFE CYCLE ASS, V16, P82, DOI 10.1007/s11367-010-0246-6; Azapagic A, 2007, CLEAN TECHNOL ENVIR, V9, P199, DOI 10.1007/s10098-007-0092-9; Bidstrup M, 2015, ENVIRON IMPACT ASSES, V54, P72, DOI 10.1016/j.eiar.201…	45	0	0	10	12	WILEY	HOBOKEN	111 RIVER ST, HOBOKEN 07030-5774, NJ USA	1551-3777	1551-3793		INTEGR ENVIRON ASSES	Integr. Environ. Assess. Manag.	MAR	2021	17	2
J	He, P; Sun, SQ; Wang, G; Li, WT; Constantoudis, V				He, Peng; Sun, Shang-qu; Wang, Gang; Li, Wei-teng; Constantoudis, Vassilios			Gaussian Process Model of Surrounding Rock Classification Based on Digital Characterization of Rock Mass Structure and Its Application	MATHEMATICAL PROBLEMS IN ENGINEERING			English	Article							ENGINEERING CLASSIFICATION; RECONSTRUCTION MODEL; FRACTURE PROPERTIES; STABILITY ANALYSIS; PREDICTION; SYSTEM; SLOPE; CONSTRUCTION; DEFORMATION; EXCAVATION	As the important data basis of surrounding rock classification, rock mass structural information obtained by traditional image processing and feature extraction algorithms could not be quantitatively analyzed because of the uncertainty and geometric randomness of structural planes. In this paper, based on straight line detection, intelligent scissors, and morphological edge detection algorithms, …	[He, Peng; Sun, Shang-qu; Wang, Gang; Li, Wei-teng; Constantoudis, Vassilios] Shandong Univ Sci & Technol, Shandong Prov Key Lab Civil Engn Disaster Prevent, Qingdao 266590, Peoples R China	Sun, SQ (corresponding author), Shandong Univ Sci & Technol, Shandong Prov Key Lab Civil Engn Disaster Prevent, Qingdao 266590, Peoples R China.	sunshangqu@163.com			Key Research and Development Program of Shandong Province [2019GSF111022]; National Natural Science Foundation of ChinaNational Natural Science Foundation of China (NSFC) [51909150]	This research was funded by Key Research and Development Program of Shandong Province (Grant no. 2019GSF111022) and National Natural Science Foundation of China (Grant no. 51909150).	Akkoyun O, 2012, ENG GEOL, V133, P66, DOI 10.1016/j.enggeo.2012.02.016; Aydin A, 2004, ENG GEOL, V74, P227, DOI 10.1016/j.enggeo.2004.03.011; Barton N., 1974, ROCK MECH, V6, P189, DOI [DOI 10.1007/BF01239496, 10.1007/bf01239496]; Bieniawski Z, 1973, CIV ENG S AFR, DOI 10.1016/0148-9062(74)90924-3; Cao J. H., 2006, INTRO MATH RELIABILI; Chen CS, 2007, TUNN UNDERGR SP TECH, V22, P377, DOI 10.1016/j…	77	0	0	5	5	HINDAWI LTD	LONDON	ADAM HOUSE, 3RD FLR, 1 FITZROY SQ, LONDON, W1T 5HF, ENGLAND	1024-123X	1563-5147		MATH PROBL ENG	Math. Probl. Eng.	OCT 19	2020	2020
J	Wu, S; Li, KG; Yang, ZH; Wu, SC; Wang, T; Qin, QC; Li, ML				Wu, Su; Li, Kegang; Yang, Zaihong; Wu, Shunchuan; Wang, Ting; Qin, Qingci; Li, Mingliang			Complex Analytical Study of the Stability of Tunnel-Surrounding Rock in a Layered Jointed Rock Mass	MATHEMATICAL PROBLEMS IN ENGINEERING			English	Article							FAILURE MODE; DEFORMATION; EXCAVATION; CAVERN	A barrier function method based on the fmincon optimization function in MATLAB was used to determine the function to map a tunnel boundary to the unit circle in the complex plane, and a structural failure criterion of the mapping convergence was established based on the reliability theory of underground engineering. The joints were approximated as cracks around the tunnel, the anisotropy of the s…	[Wu, Su; Li, Kegang; Wu, Shunchuan; Wang, Ting; Qin, Qingci; Li, Mingliang] Kunming Univ Sci & Technol, Fac Land Resources Engn, Kunming 650093, Yunnan, Peoples R China; [Wu, Su; Li, Kegang; Wu, Shunchuan; Wang, Ting; Qin, Qingci; Li, Mingliang] Yunnan Key Lab Sino German Blue Min & Utilizat Sp, Kunming 650093, Yunnan, Peoples R China; [Yang, Zaihong] PowerChina Kunming Engn Corp Ltd, Kunming 650…	Li, KG (corresponding author), Kunming Univ Sci & Technol, Fac Land Resources Engn, Kunming 650093, Yunnan, Peoples R China.; Li, KG (corresponding author), Yunnan Key Lab Sino German Blue Min & Utilizat Sp, Kunming 650093, Yunnan, Peoples R China.	wusu.kmust@foxmail.com; 106146135@qq.com; 516300877@qq.com; wushunchuan@163.com; ngwt615@163.com; 1457186548@qq.com; 962864321@qq.com			National Natural Science Foundation of ChinaNational Natural Science Foundation of China (NSFC) [41672303, 51934003]; Program for Innovative Research Team (in Science and Technology) in University of Yunnan Province	*e authors thank LetPub (http://www.letpub.com) for its linguistic assistance and scientific consultation during the preparation of this manuscript. *is work was supported by the National Natural Science Foundation of China (41672303 and 51934003) and Program for Innovative Research Team (in Science and Technology) in University of Yunnan Province (2019).	[包含 Bao Han], 2017, [煤炭学报, Journal of China Coal Society], V42, P604; [陈子全 Chen Ziquan], 2018, [西南交通大学学报, Journal of Southwest Jiaotong University], V53, P1237; Cui Z.-D., 2017, UNDERGROUND STRUCTUR; Deng T., 2015, J HIGHWAY TRANSPORT, V28, P90; [管俊峰 Guan Junfeng], 2018, [岩石力学与工程学报, Chinese Journal of Rock Mechanics and Engineering], V37, P1146; [胡宝文 Hu Baowen], 2017, [岩石力学与工程学报, Chinese Journal …	34	1	1	6	6	HINDAWI LTD	LONDON	ADAM HOUSE, 3RD FLR, 1 FITZROY SQ, LONDON, W1T 5HF, ENGLAND	1024-123X	1563-5147		MATH PROBL ENG	Math. Probl. Eng.	OCT 16	2020	2020
J	Jiang, Q; Zhang, MZ; Yan, F; Su, GS; Feng, XT; Xu, DP; Feng, GL				Jiang, Quan; Zhang, Meizhu; Yan, Fei; Su, Guoshao; Feng, Xiating; Xu, Dingping; Feng, Guangliang			Effect of initial minimum principal stress and unloading rate on the spalling and rockburst of marble: a true triaxial experiment investigation	BULLETIN OF ENGINEERING GEOLOGY AND THE ENVIRONMENT			English	Article						Rockburst; Spalling; Unloading rate; Minimum principal stress; Tensile failure	ROCK MASS; EXCAVATION RESPONSE; BRITTLE FAILURE; SIMULATION TEST; TUNNEL; STRENGTH; ENERGY; DAMAGE; TESTS; DEFORMATION	Hard rock often performs as brittle failures, such as cracking, spalling, and rockburst, induced by excavation in deep underground engineering. To understand the effect of the minimum principal stress and unloading rate on the spalling and rockburst of marble, unloading experiments were carried out by using true triaxial equipment combined with a high-speed camera, acoustic emission instrumentati…	[Jiang, Quan; Zhang, Meizhu; Yan, Fei; Feng, Xiating; Xu, Dingping; Feng, Guangliang] Chinese Acad Sci, Inst Rock & Soil Mech, State Key Lab Geomech & Geotech Engn, Wuhan 430071, Peoples R China; [Zhang, Meizhu] Univ Chinese Acad Sci, Beijing 100049, Peoples R China; [Zhang, Meizhu] Uppsala Univ, SE-75105 Uppsala, Sweden; [Su, Guoshao] Guangxi Univ, Sch Civil & Architecture Engn, Key Lab Disaster…	Yan, F (corresponding author), Chinese Acad Sci, Inst Rock & Soil Mech, State Key Lab Geomech & Geotech Engn, Wuhan 430071, Peoples R China.	fyan@whrsm.ac.cn	Feng, Guang-Liang/AAP-2263-2021	Feng, Guang-Liang/0000-0001-9231-0732; Yan, Fei/0000-0003-4584-5798	NationalNatural Science Foundation of ChinaNational Natural Science Foundation of China (NSFC) [U1965205, 51779251]; Hubei Province Outstanding Youth Fund of China [2017CFA060]	The authors gratefully acknowledge the financial support from theNationalNatural Science Foundation of China (no. U1965205 and no. 51779251) and Hubei Province Outstanding Youth Fund of China (no. 2017CFA060).	Amadei B., 1997, ROCK STRESS ITS MEAS; An L, 2018, B ENG GEOL ENVIRON, V77, P1179, DOI 10.1007/s10064-017-1168-3; Bandis S.C., 1989, ISRM INT S; BARTON N, 1976, INT J ROCK MECH MIN, V13, P255, DOI 10.1016/0148-9062(76)90003-6; Basu A, 2013, B ENG GEOL ENVIRON, V72, P457, DOI 10.1007/s10064-013-0505-4; Blake W., 2003, ROCKB CAS STUD N AM; Brady BH, 2006, ROCK MECH UNDERGROUN; BROCH E, 1984, ROCK M…	75	2	2	20	30	SPRINGER HEIDELBERG	HEIDELBERG	TIERGARTENSTRASSE 17, D-69121 HEIDELBERG, GERMANY	1435-9529	1435-9537		B ENG GEOL ENVIRON	Bull. Eng. Geol. Environ.	FEB	2021	80	2
J	Peguiron, F; Labiouse, V				Peguiron, Florence; Labiouse, Vincent			Consideration of anisotropies related to bedding planes in the modelling of thick-walled hollow cylinder tests on Boom Clay	EUROPEAN JOURNAL OF ENVIRONMENTAL AND CIVIL ENGINEERING			English	Article; Early Access						Hollow cylinder test; numerical modelling; anisotropy; Boom clay	TIME-DEPENDENT BEHAVIOR; EXCAVATION DAMAGED ZONE; CONSTITUTIVE MODEL; SIMULATION; DEFORMATION; GALLERIES; ROCK	Tunnel excavation in Boom Clay formation, Belgium, highlighted an anisotropic behaviour related to its bedding planes. Hollow cylinder tests mimicking tunnel excavation under laboratory conditions confirmed the isotropic convergence of samples cored perpendicular to the bedding and the anisotropic behaviour of samples cored parallel to the bedding. This article investigates the possibility to rep…	[Peguiron, Florence] Univ Lorraine, CNRS, GeoRessources, F-54000 Nancy, France; [Peguiron, Florence; Labiouse, Vincent] Univ Appl Sci & Arts Western Switzerland HES SO, Sch Engn & Architecture Fribourg, iTEC, HEIA FR, Blvd Perolles 80, CH-1700 Fribourg, Switzerland	Peguiron, F (corresponding author), Univ Lorraine, CNRS, GeoRessources, F-54000 Nancy, France.; Peguiron, F (corresponding author), Univ Appl Sci & Arts Western Switzerland HES SO, Sch Engn & Architecture Fribourg, iTEC, HEIA FR, Blvd Perolles 80, CH-1700 Fribourg, Switzerland.	florence.peguiron@hefr.ch		Labiouse, Vincent/0000-0001-8416-136X	Belgian National Agency for Radioactive Waste and Enriched Fissile Material ONDRAF/NIRAS	This work is part of a research project funded by the Belgian National Agency for Radioactive Waste and Enriched Fissile Material ONDRAF/NIRAS.	Bastiaens W., 2003, 03294 EURIDICE; Bastiaens W, 2007, PHYS CHEM EARTH, V32, P600, DOI 10.1016/j.pce.2006.04.026; Bernier F, 2007, GEOTECHNIQUE, V57, P229, DOI 10.1680/geot.2007.57.2.229; Bernier F., 2003, 20619 EUR EUR COMM; Blumling P, 2007, PHYS CHEM EARTH, V32, P588, DOI 10.1016/j.pce.2006.04.034; Chen GJ, 2011, COMPUT GEOTECH, V38, P683, DOI 10.1016/j.compgeo.2011.04.001; Coll C., 2005, ENDO…	26	0	0	2	7	TAYLOR & FRANCIS LTD	ABINGDON	2-4 PARK SQUARE, MILTON PARK, ABINGDON OR14 4RN, OXON, ENGLAND	1964-8189	2116-7214		EUR J ENVIRON CIV EN	Eur. J. Environ. Civ. Eng.
J	Wang, M; Zhou, JW; Shi, AC; Han, JQ; Li, HB				Wang, Meng; Zhou, Jia-wen; Shi, An-chi; Han, Jin-qi; Li, Hai-bo			Key Factors Affecting the Deformation and Failure of Surrounding Rock Masses in Large-Scale Underground Powerhouses	ADVANCES IN CIVIL ENGINEERING			English	Article							EXCAVATION-DAMAGED ZONES; IN-SITU OBSERVATION; STABILITY ANALYSIS; HIGH GEOSTRESS; CAVERN; MECHANISM; BEHAVIOR; EVOLUTION	The stability of the surrounding rock masses of underground powerhouses is always emphasized during the construction period. With the general trends toward large-scale, complex geological conditions and the rapid construction progress of underground powerhouses, deformation and failure issues of the surrounding rock mass can emerge, putting the safety of construction and operation in jeopardy and…	[Wang, Meng] Sichuan Univ, State Key Lab Hydraul & Mt River Engn, Chengdu 610065, Peoples R China; [Zhou, Jia-wen; Li, Hai-bo] Sichuan Univ, Coll Water Resource & Hydropower, Chengdu 610065, Peoples R China; [Shi, An-chi] PowerChina Huadong Engn Co Ltd, Hangzhou 311122, Peoples R China; [Han, Jin-qi] Sinohydro Bur 7 Co Ltd, Power Construct Corp China, Chengdu 610081, Peoples R China	Li, HB (corresponding author), Sichuan Univ, Coll Water Resource & Hydropower, Chengdu 610065, Peoples R China.	451812249@qq.com; jwzhou@scu.edu.cn; shi_ac@ecidi.com; 363691160@qq.com; hbli@scu.edu.cn	Zhou, Jia-wen/A-7807-2012	Zhou, Jia-wen/0000-0002-6817-1071	Graduate Student's Research Innovation Foundation of Sichuan University [2018YJSY076]; Science Foundation for Excellent Youth Scholars of Sichuan University [2013SCU04A07]	The authors gratefully acknowledge the support of the Graduate Student's Research Innovation Foundation of Sichuan University (2018YJSY076) and the Science Foundation for Excellent Youth Scholars of Sichuan University (2013SCU04A07).	Abdollahipour A, 2013, ARAB J GEOSCI, V6, P4811, DOI 10.1007/s12517-012-0698-z; Barton N., 1974, ROCK MECH, V6, P189, DOI [DOI 10.1007/BF01239496, 10.1007/bf01239496]; Bedon C, 2016, ADV CIV ENG, V2016, DOI 10.1155/2016/1345478; Bian K, 2009, ICICTA: 2009 SECOND INTERNATIONAL CONFERENCE ON INTELLIGENT COMPUTATION TECHNOLOGY AND AUTOMATION, VOL III, PROCEEDINGS, P269, DOI 10.1109/ICICTA.2009.532; …	53	0	0	2	2	HINDAWI LTD	LONDON	ADAM HOUSE, 3RD FLR, 1 FITZROY SQ, LONDON, W1T 5HF, ENGLAND	1687-8086	1687-8094		ADV CIV ENG	Adv. Civ. Eng.	OCT 12	2020	2020
J	Li, ZY; Wang, LQ; Feng, B; Xiao, J; Zhang, Q; Li, LY; Liang, J				Li, Ziyuan; Wang, Liqiong; Feng, Bo; Xiao, Jie; Zhang, Qi; Li, Liying; Liang, Jie			Comprehensive collapse investigation and treatment: An engineering case from qingdao expressway tunnel	JOURNAL OF CLEANER PRODUCTION			English	Article						Shallow depth tunnel; Copllase; Grey correlation; Longitudinal joint support; FEM analysis; Small pipe pre-grouting	FACE STABILITY ANALYSIS; SHALLOW TUNNEL; CIRCULAR TUNNELS; MECHANISM; FAILURE; SHIELD; VULNERABILITY; SUBWAY; SOILS	On Sep 26, 2015, an expressway tunnel through Chaoyang mountain of Qingdao China collapsed during construction. Fortunately, no victims were identified in this disaster. In order to ensure construction safety and realize the purpose of environmental protection and clean production, this paper investigated the collapse factors of the shallow tunnel by simulation and field measurement. In view of t…	[Li, Ziyuan; Wang, Liqiong; Feng, Bo; Xiao, Jie; Zhang, Qi; Li, Liying; Liang, Jie] Beijing Inst Technol, State Key Lab Explos Sci & Technol, Room 208,5 South Zhongguancun St, Beijing 100081, Peoples R China	Wang, LQ (corresponding author), Beijing Inst Technol, State Key Lab Explos Sci & Technol, Room 208,5 South Zhongguancun St, Beijing 100081, Peoples R China.	wlq2018@sina.com					Alagha ASN, 2019, TUNN UNDERGR SP TECH, V94, DOI 10.1016/j.tust.2019.103096; Basahel H, 2019, INT J MIN SCI TECHNO, V29, P357, DOI 10.1016/j.ijmst.2018.11.002; Bezuijen A, 2011, J GEOTECH GEOENVIRON, V137, P611, DOI 10.1061/(ASCE)GT.1943-5606.0000465; Chen Y., 2015, STABILITY ANAL CONTR; Ding T., 2013, STUDY STABILITY INTE; Ding WT, 2019, COMPUT GEOTECH, V107, P110, DOI 10.1016/j.compgeo.2018.11.…	44	0	0	20	23	ELSEVIER SCI LTD	OXFORD	THE BOULEVARD, LANGFORD LANE, KIDLINGTON, OXFORD OX5 1GB, OXON, ENGLAND	0959-6526	1879-1786		J CLEAN PROD	J. Clean Prod.	OCT 10	2020	270
J	Wang, YC; Li, ZY; Jing, HW; Li, YB; Wang, MT				Wang, Yingchao; Li, Zhaoyang; Jing, Hongwen; Li, Yabo; Wang, Mitian			Study on the seepage characteristics of deep buried tunnels under variable high-pressure water heads	BULLETIN OF ENGINEERING GEOLOGY AND THE ENVIRONMENT			English	Article						Water inrush; High-pressure water head; Excavation disturbance; Seepage characteristics	RISK-ASSESSMENT; NUMERICAL-ANALYSIS; KARST TUNNELS; MUD INRUSH; FLOW; MECHANISMS; INFLOW; ROCK	Well-connected seepage channels are the key components of tunnel water inrush. To study the trends of the pore water pressure in the rock mass in a seepage channel, the physical experiment and corresponding numerical model were established. First, in the seepage experiment under excavation disturbance, the propagation rate of the high-pressure water source and the growth rate of the pore water pr…	[Wang, Yingchao; Li, Zhaoyang; Jing, Hongwen; Li, Yabo; Wang, Mitian] China Univ Min & Technol, State Key Lab Geomech & Deep Underground Engn, Xuzhou 221116, Jiangsu, Peoples R China; [Wang, Yingchao; Li, Zhaoyang; Jing, Hongwen; Li, Yabo; Wang, Mitian] China Univ Min & Technol, Sch Mech & Civil Engn, Xuzhou 221116, Jiangsu, Peoples R China	Wang, YC (corresponding author), China Univ Min & Technol, State Key Lab Geomech & Deep Underground Engn, Xuzhou 221116, Jiangsu, Peoples R China.; Wang, YC (corresponding author), China Univ Min & Technol, Sch Mech & Civil Engn, Xuzhou 221116, Jiangsu, Peoples R China.	wych12345678@126.com			Self-determined Project of State Key Laboratory for Geomechanics and Deep Underground Engineering [Z19010]; National Natural Science Foundation of ChinaNational Natural Science Foundation of China (NSFC) [41572263]	Financial supports received from Self-determined Project of State Key Laboratory for Geomechanics and Deep Underground Engineering (Z19010) and the National Natural Science Foundation of China (41572263).	Bukowski P, 2011, MINE WATER ENVIRON, V30, P302, DOI 10.1007/s10230-011-0148-2; Chen B, 2021, B ENG GEOL ENVIRON, V80, P663, DOI 10.1007/s10064-020-01941-5; Farhadian H, 2019, B ENG GEOL ENVIRON, V78, P3833, DOI 10.1007/s10064-018-1348-9; Golian M, 2018, HYDROGEOL J, V26, P2827, DOI 10.1007/s10040-018-1835-x; Huang Z, 2018, CHINES J BASIC SCI E, V27, P1345, DOI [10.16058/j.issn.1005-0930.2019.06.…	32	3	3	21	34	SPRINGER HEIDELBERG	HEIDELBERG	TIERGARTENSTRASSE 17, D-69121 HEIDELBERG, GERMANY	1435-9529	1435-9537		B ENG GEOL ENVIRON	Bull. Eng. Geol. Environ.	FEB	2021	80	2
J	Zhao, ZL; Jing, HW; Shi, XS; Gao, Y				Zhao, Zhenlong; Jing, Hongwen; Shi, Xinshuai; Gao, Yuan			Experimental and numerical research on fracture behaviors of sandstone under different loading rates	GEOMECHANICS AND GEOPHYSICS FOR GEO-ENERGY AND GEO-RESOURCES			English	Article						Brazilian disc test; Loading rate; Fracture behavior; Acoustic emission; Particle flow code	ACOUSTIC-EMISSION CHARACTERISTICS; ROCK-LIKE MATERIAL; STRAIN-RATE; TENSILE-STRENGTH; MECHANICAL-BEHAVIOR; RATE DEPENDENCY; CRACKING; DAMAGE; COAL; PREDICTION	The macroscopic deformation process of rock is the external performance of microscopic damage in essence, and research from the macro and micro perspectives can effectively reveal the failure mechanism of rock. To further investigate the fracture behaviors of yellow sandstone disc specimens under different loading rates, seven groups of Brazilian disc splitting tests with different loading rates …	[Zhao, Zhenlong; Jing, Hongwen; Shi, Xinshuai; Gao, Yuan] China Univ Min & Technol, State Key Lab Geomech & Deep Underground Engn, Xuzhou 221116, Jiangsu, Peoples R China; [Shi, Xinshuai] Nagasaki Univ, Grad Sch Engn, Nagasaki 8528521, Japan; [Gao, Yuan] Monash Univ, Dept Civil Engn, Clayton, Vic 3800, Australia	Jing, HW (corresponding author), China Univ Min & Technol, State Key Lab Geomech & Deep Underground Engn, Xuzhou 221116, Jiangsu, Peoples R China.	hongwenjingcumt@163.com			National Natural Science Foundation of ChinaNational Natural Science Foundation of China (NSFC) [51734009]	This work was supported by National Natural Science Foundation of China (Grant No. 51734009). The authors gratefully appreciate this support.	Bahaaddini M, 2019, EUR J ENVIRON CIV EN, DOI 10.1080/19648189.2019.1579759; Bieniawski Z.T., 1970, ROCK MECH ROCK ENG, V2, P123; BIENIAWSKI ZT, 1978, INT J ROCK MECH MIN, V15, P99; Cao AY, 2019, SAFETY SCI, V116, P86, DOI 10.1016/j.ssci.2019.03.003; Chen M, 2019, ENERGIES, V12, DOI 10.3390/en12010079; Chen SJ, 2019, INT J ROCK MECH MIN, V123, DOI 10.1016/j.ijrmms.2019.104120; Cho SH, 2003, INT J…	44	1	1	25	38	SPRINGER HEIDELBERG	HEIDELBERG	TIERGARTENSTRASSE 17, D-69121 HEIDELBERG, GERMANY	2363-8419	2363-8427		GEOMECH GEOPHYS GEO	Geomech. Geophys. Geo-Energy Geo-Resour.	OCT 10	2020	6	4
J	Wang, C; Xie, MZ; Xiong, ZQ; Wang, C; Cheng, LP				Wang, Chun; Xie, Mei-zhi; Xiong, Zu-qiang; Wang, Cheng; Cheng, Lu-ping			Energy Evolution Law of Ore-Bearing Rock during Unloading under High Static Stress and Frequent Disturbance	COMPLEXITY			English	Article							FAILURE; IMPACT; SANDSTONE; COMPRESSION; BEHAVIOR; WATER	Based on the complex engineering environment in deep rock engineering, preloaded high axial pressure, unloading of axial pressure, and impact loading were used to simulate high in situ stress, unloading of excavation, and blasting disturbance, respectively; the experimental study on frequent impact disturbances under unloading of high static load was carried out, which aimed at revealing the ener…	[Wang, Chun; Xiong, Zu-qiang; Wang, Cheng; Cheng, Lu-ping] Henan Polytech Univ, Sch Energy Sci & Engn, Jiaozuo 454000, Henan, Peoples R China; [Wang, Chun; Xie, Mei-zhi] Guangxi Univ, Guangxi Key Lab Disaster Prevent & Engn Safety, Nanning, Guangxi, Peoples R China; [Wang, Chun; Wang, Cheng; Cheng, Lu-ping] Henan Polytech Univ, State & Local Joint Engn Lab Gas Drainage & Groun, Jiaozuo 454000, He…	Xiong, ZQ; Wang, C (corresponding author), Henan Polytech Univ, Sch Energy Sci & Engn, Jiaozuo 454000, Henan, Peoples R China.; Xie, MZ (corresponding author), Guangxi Univ, Guangxi Key Lab Disaster Prevent & Engn Safety, Nanning, Guangxi, Peoples R China.; Wang, C (corresponding author), Henan Polytech Univ, State & Local Joint Engn Lab Gas Drainage & Groun, Jiaozuo 454000, Henan, Peoples R Chin…	wangchun@hpu.edu.cn; xmzgxdx@163.com; 47827889@qq.com; 23754987@qq.com; 775174918@qq.com		Wang, Chun/0000-0002-0858-654X	Systematic Project of Guangxi Key Laboratory of Disaster Prevention and Engineering Safety [2019ZDK052]; National Natural Science Foundation of ChinaNational Natural Science Foundation of China (NSFC) [51904093]; Henan Innovative Science and Technology Team Support Project [CXTD2017088]; Key Laboratory Open Foundation of Henan Polytechnic University [SJF20180]; Key Research and Development and Pr…	This research was funded by the Systematic Project of Guangxi Key Laboratory of Disaster Prevention and Engineering Safety, grant no. 2019ZDK052, National Natural Science Foundation of China, grant no. 51904093, Henan Innovative Science and Technology Team Support Project, grant no. CXTD2017088, Key Laboratory Open Foundation of Henan Polytechnic University, grant no. SJF20180, Key Research and D…	Braunagel MJ, 2019, GEOPHYS RES LETT, V46, P6479, DOI 10.1029/2019GL082723; Cai MF, 2017, ENGINEERING-PRC, V3, P432, DOI 10.1016/J.ENG.2017.04.027; Cai X, 2020, ENG FRACT MECH, V234, DOI 10.1016/j.engfracmech.2020.107109; Cai X, 2020, INT J ROCK MECH MIN, V130, DOI 10.1016/j.ijrmms.2020.104339; Chen ZH, 2019, GEOFLUIDS, DOI 10.1155/2019/4657645; Du HB, 2020, SOIL DYN EARTHQ ENG, V129, DOI 10.1016…	45	0	0	0	0	WILEY-HINDAWI	LONDON	ADAM HOUSE, 3RD FL, 1 FITZROY SQ, LONDON, WIT 5HE, ENGLAND	1076-2787	1099-0526		COMPLEXITY	Complexity	OCT 9	2020	2020
J	Ghadrdan, M; Shaghaghi, T; Tolooiyan, A				Ghadrdan, Mohsen; Shaghaghi, Tahereh; Tolooiyan, Ali			Sensitivity of the stability assessment of a deep excavation to the material characterisations and analysis methods	GEOMECHANICS AND GEOPHYSICS FOR GEO-ENERGY AND GEO-RESOURCES			English	Article						Slope stability; Sensitivity analysis; Factor of safety; LEM; FEM	PROBABILISTIC SLOPE STABILITY; ROCK SLOPE; STABILIZATION	Due to the spatial variability of material characterisations in deep and large scale excavations, stability assessment is often a challenging task. Numerous slope stability analysis methods based on a range of assumptions and principles are implemented in commercial software packages to ease the process of stability assessment of non-homogeneous and multi-layered slopes. However, the selection of…	[Ghadrdan, Mohsen; Shaghaghi, Tahereh] Federat Univ Australia, Geotech & Hydrogeol Engn Res Grp GHERG, Churchill, Vic, Australia; [Tolooiyan, Ali] Univ Tasmania, Sch Engn, Coll Sci & Engn, Hobart, Tas, Australia	Tolooiyan, A (corresponding author), Univ Tasmania, Sch Engn, Coll Sci & Engn, Hobart, Tas, Australia.	ali.tolooiyan@utas.edu.au		Tolooiyan, Ali/0000-0001-8072-636X	Earth Resources Regulation of the Victorian State Government Department of Economic Development, Jobs, Transport and Resources; Australian Government Research Training Program (RTP); GHERG scholarship programme	Financial support for this research has been provided by Earth Resources Regulation of the Victorian State Government Department of Economic Development, Jobs, Transport and Resources. The first and second authors are funded by the Australian Government Research Training Program (RTP) and the GHERG scholarship programme. The authors also wish to thank Mr Mojtaba Karami for providing the results o…	Abramson L., 2002, SLOPE STABILITY STAB, V2nd; Agheshlui H, 2019, GEOMECH GEOPHYS GEO, V5, P159, DOI 10.1007/s40948-019-00111-6; Aryal K., 2006, THESIS; Brinkgreve R, 2010, PLAXIS 2D 2010; Carranza-Torres C, 2017, GEOMECH GEOPHYS GEO, V3, P131, DOI 10.1007/s40948-017-0049-3; Chandler DS, 1996, GEOTECH SP, P474; Dawson EM, 1999, GEOTECHNIQUE, V49, P835, DOI 10.1680/geot.1999.49.6.835; Diederichs M…	73	2	2	6	9	SPRINGER HEIDELBERG	HEIDELBERG	TIERGARTENSTRASSE 17, D-69121 HEIDELBERG, GERMANY	2363-8419	2363-8427		GEOMECH GEOPHYS GEO	Geomech. Geophys. Geo-Energy Geo-Resour.	OCT 8	2020	6	4
J	Abu Bakar, MZ; Majeed, Y; Rashid, MA				Abu Bakar, M. Z.; Majeed, Y.; Rashid, M. A.			Influence of propeller material hardness, testing time, rock properties, and conditioning on LCPC rock abrasiveness test	BULLETIN OF ENGINEERING GEOLOGY AND THE ENVIRONMENT			English	Article						Wear; Soft steel propeller; Hard steel propeller; Mass loss (%); Test time; Schimazek's F value; RAI value	TUNNEL BORING MACHINE; SOIL ABRASIVITY; SUGGESTED METHODS; WATER-CONTENT; WEAR; EXCAVATION; PARAMETERS; IMPACT; PERFORMANCE; STRESS	LCPC rock abrasiveness test is gaining popularity for quick estimation of rock and soil abrasiveness in the preliminary site exploration stage of tunneling projects. However, there are parameters such as test propeller hardness and testing time, which may affect the test results thereby influencing the tool wear rate estimates of the tunneling machines employed in those projects. This study evalu…	[Abu Bakar, M. Z.; Rashid, M. A.] Univ Engn & Technol, Dept Geol Engn, Lahore, Pakistan; [Majeed, Y.] Univ Engn & Technol, Dept Min Engn, Lahore, Pakistan	Abu Bakar, MZ (corresponding author), Univ Engn & Technol, Dept Geol Engn, Lahore, Pakistan.	mzubairab1977@gmail.com		Abu Bakar, Dr. Muhammad Zubair/0000-0001-8759-4590	Higher Education Commission, PakistanHigher Education Commission of Pakistan [7396]	This study was funded by the Higher Education Commission, Pakistan, with Grant No. 7396.	Abu Bakar MZ, 2020, B ENG GEOL ENVIRON, V79, P2561, DOI 10.1007/s10064-019-01719-4; Abu Bakar MZ, 2018, TUNN UNDERGR SP TECH, V81, P165, DOI 10.1016/j.tust.2018.07.021; Abu Bakar MZ, 2016, WEAR, V368, P132, DOI 10.1016/j.wear.2016.09.007; Abu Bakar M. Z. A, 2014, PAKISTAN J SCI, V66, P25; AFNOR, 1990, P18579 AFNOR NF; AFTES, 1982, 4 AFTES; Alber M, 2008, TUNN UNDERGR SP TECH, V23, P351, DOI 10.10…	71	0	0	1	1	SPRINGER HEIDELBERG	HEIDELBERG	TIERGARTENSTRASSE 17, D-69121 HEIDELBERG, GERMANY	1435-9529	1435-9537		B ENG GEOL ENVIRON	Bull. Eng. Geol. Environ.	FEB	2021	80	2
J	Paul, A; Murthy, VMSR; Prakash, A; Singh, AK				Paul, Avinash; Murthy, Vemavarapu Mallika Sita Ramachandra; Prakash, Amar; Singh, Ajoy Kumar			Estimation of rock load for junctions based on roof failure cases for safe mining operation	ARABIAN JOURNAL OF GEOSCIENCES			English	Article						RMR; Rock mass classification; Junctions; Roof failure; Support design; Safety	DEVELOPMENT WORKINGS; PREDICTION; SUPPORT; MINES	Coal mine roadway junctions in bord and pillar mining, in particular, are more vulnerable to roof fall due to the excavation induced stresses as well as general stress loading pattern inherent to the typical cross section achieved in practice. Roof fall incidences are generally more in junctions of development galleries and a cause of concern as they provide access to faces in different direction…	[Paul, Avinash; Prakash, Amar; Singh, Ajoy Kumar] Cent Inst Min & Fuel Res CSIR, Dhanbad 826015, Bihar, India; [Murthy, Vemavarapu Mallika Sita Ramachandra] Indian Sch Mines, Indian Inst Technol, Dhanbad 826004, Bihar, India	Paul, A (corresponding author), Cent Inst Min & Fuel Res CSIR, Dhanbad 826015, Bihar, India.	avinashpaul02@gmail.com	Murthy, V M S R/H-1003-2015	Murthy, V M S R/0000-0002-1764-481X			Barton N., 1974, ROCK MECH, V6, P189, DOI [DOI 10.1007/BF01239496, 10.1007/bf01239496]; Bieniawski Z, 1973, CIV ENG S AFR, DOI 10.1016/0148-9062(74)90924-3; Bieniawski ZT., 1976, P97; Bureau of Indian Standard, 100501981 BUR IND ST; Bureau of Indian Standard, 91431979 BUR IND STA; Cai M, 2019, INT J MIN SCI TECHNO, V29, P529, DOI 10.1016/j.ijmst.2019.06.008; Carter T.G., 1992, P 4 INT ROCK MECH R…	36	0	0	3	8	SPRINGER HEIDELBERG	HEIDELBERG	TIERGARTENSTRASSE 17, D-69121 HEIDELBERG, GERMANY	1866-7511	1866-7538		ARAB J GEOSCI	Arab. J. Geosci.	OCT 7	2020	13	20
J	Shi, GC; Gu, GK; Zhou, H; Tao, ZG; Pan, HY; Tang, T				Shi, Guangcheng; Gu, Gongkai; Zhou, Hua; Tao, Zhigang; Pan, Hongyue; Tang, Ting			Stability Monitoring and Analysis of High and Steep Slope of a Hydropower Station	GEOFLUIDS			English	Review							LEFT-BANK SLOPE; ROCK; MECHANISM; DEFORMATION; LANDSLIDES; RESERVOIR; COLLAPSE	Slope deformation and failure are major challenges for hydropower station engineering. Taking the left bank slope at the exit of the flood discharge tunnel of the Wudongde Hydropower Station in China as an example, the deformation mechanism of the high-steep rock slope was studied. The height of the slope is about 200 m, which is affected by slope excavation, rainfall, and atomized rain. The resu…	[Shi, Guangcheng; Tao, Zhigang] China Univ Min & Technol Beijing, State Key Lab Geomech & Deep Underground Engn, Beijing 100083, Peoples R China; [Shi, Guangcheng; Tao, Zhigang] China Univ Min & Technol, Sch Mech & Civil Engn, Beijing 100083, Peoples R China; [Gu, Gongkai; Pan, Hongyue] China Three Gorges Construct Management Co Ltd, Beijing 100038, Peoples R China; [Zhou, Hua] Changjiang Survey …	Tao, ZG (corresponding author), China Univ Min & Technol Beijing, State Key Lab Geomech & Deep Underground Engn, Beijing 100083, Peoples R China.; Tao, ZG (corresponding author), China Univ Min & Technol, Sch Mech & Civil Engn, Beijing 100083, Peoples R China.	shiguangcheng8@163.com; gugk198001@163.com; zhouh198002@163.com; taozhigang@263.net; panhy198003@163.com; tangt198301@163.com		Tao, Zhigang/0000-0002-8908-3038	Zhejiang Province Key RD Projects [2019C03104]; Fundamental Research Funds for the Central Universities, SCUTFundamental Research Funds for the Central Universities [2015QB02]	This study was supported by the Zhejiang Province Key R&D Projects (No. 2019C03104) and the Fundamental Research Funds for the Central Universities, SCUT (No. 2015QB02).	Atzeni C, 2015, ROCK MECH ROCK ENG, V48, P235, DOI 10.1007/s00603-014-0554-4; Cai JC, 2019, J MT SCI-ENGL, V16, P924, DOI 10.1007/s11629-018-5096-x; Chen JT, 2020, PURE APPL GEOPHYS, V177, P5325, DOI 10.1007/s00024-020-02550-9; Conte Omar A., 2012, GeoCongress 2012 State of the Art and Practice in Geotechnical Engineering, P3060, DOI 10.1061/9780784412121.313; Dai F, 2017, ROCK MECH ROCK ENG, V50…	45	0	0	12	12	WILEY-HINDAWI	LONDON	ADAM HOUSE, 3RD FL, 1 FITZROY SQ, LONDON, WIT 5HE, ENGLAND	1468-8115	1468-8123		GEOFLUIDS	Geofluids	OCT 6	2020	2020
J	Su, K; Zhang, YJ; Cui, JP; Li, CA				Su, Kai; Zhang, Yan-Jun; Cui, Jin-Peng; Li, Cong-An			Installation Time of Ground Support during Tunnel Excavation: A Novel Graph Methodology	KSCE JOURNAL OF CIVIL ENGINEERING			English	Article						Tunnel excavation; Ground support; Numerical simulation; FDM; Graph method	ROCK; LINER	Installation time of ground support in many caverns excavation is mainly based on analytical and empirical method, instead of the robust numerical simulations. A novel graph method is proposed to determine the installation time of the support upon finite difference method (FDM) simulation. A three dimensional numerical model for the diversion tunnel of Guandi hydropower station is developed. The …	[Su, Kai; Zhang, Yan-Jun] Wuhan Univ, State Key Lab Water Resource & Hydropower Engn Sc, Wuhan 430072, Peoples R China; [Su, Kai] Wuhan Univ, Key Lab Rock Mech Hydraul Struct Engn, Minist Educ, Wuhan 430072, Peoples R China; [Su, Kai] Wuhan Univ, Hubei Prov Key Lab Water Syst Sci Sponge City Con, Wuhan 430072, Peoples R China; [Cui, Jin-Peng] Changjiang Inst Survey Planning Design & Res, Wuhan 43…	Su, K (corresponding author), Wuhan Univ, State Key Lab Water Resource & Hydropower Engn Sc, Wuhan 430072, Peoples R China.; Su, K (corresponding author), Wuhan Univ, Key Lab Rock Mech Hydraul Struct Engn, Minist Educ, Wuhan 430072, Peoples R China.; Su, K (corresponding author), Wuhan Univ, Hubei Prov Key Lab Water Syst Sci Sponge City Con, Wuhan 430072, Peoples R China.	suker8044@163.com		Su, Kai/0000-0002-5948-907X	National Key Research and Development Program of China [2016YFC0401803]; National Natural Science Foundation of ChinaNational Natural Science Foundation of China (NSFC) [51879207]	This work was supported by the National Key Research and Development Program of China [grant number 2016YFC0401803]; the National Natural Science Foundation of China [grant number 51879207].	Aksoy CO, 2012, INT J ROCK MECH MIN, V52, P61, DOI 10.1016/j.ijrmms.2012.02.008; Carranza-Torres C, 2013, INT J ROCK MECH MIN, V61, P57, DOI 10.1016/j.ijrmms.2013.01.010; DETOURNAY E, 1987, INT J ROCK MECH MIN, V24, P197, DOI 10.1016/0148-9062(87)90175-6; Eberhardt E, 2001, INT J ROCK MECH MIN, V38, P499, DOI 10.1016/S1365-1609(01)00017-X; Gonzalez-Nicieza C, 2008, TUNN UNDERGR SP TECH, V23, P25,…	22	0	0	6	10	KOREAN SOCIETY OF CIVIL ENGINEERS-KSCE	SEOUL	3-16 JUNGDAE-RO 25-GIL, SONGPA-GU, SEOUL, 05661, SOUTH KOREA	1226-7988	1976-3808		KSCE J CIV ENG	KSCE J. Civ. Eng.	DEC	2020	24	12
J	Yang, JP; Yang, DS; Zhang, X; Jeffrey, RG; Chen, WZ; Sheng, Q; Zhang, FS				Yang, Jianping; Yang, Diansen; Zhang, Xi; Jeffrey, Robert G.; Chen, Weizhong; Sheng, Qian; Zhang, Fengshou			Energy Budget and Fast Rupture on a Near-Excavation Fault: Implications for Mitigating Induced Seismicity	JOURNAL OF GEOPHYSICAL RESEARCH-SOLID EARTH			English	Article							SLIP-WEAKENING DISTANCE; STRESS; EARTHQUAKES; NUCLEATION; GROWTH	Reducing seismicity during excavation is a challenge faced by mining and the associated slip development on a near-excavation fault under deep-mining stress conditions is considered as an analog for understanding earthquake initiation mechanisms. In this paper, the quasi-static slipping on a dipping fault near a horizontal tunnel was numerically studied by incrementally increasing horizontal stre…	[Yang, Jianping; Yang, Diansen; Zhang, Xi; Chen, Weizhong; Sheng, Qian] Chinese Acad Sci, Inst Rock & Soil Mech, State Key Lab Geomech & Geotech Engn, Wuhan, Peoples R China; [Yang, Jianping; Yang, Diansen; Sheng, Qian] Univ Chinese Acad Sci, Sch Engn Sci, Beijing, Peoples R China; [Zhang, Xi] CSIRO Energy, Melbourne, Vic, Australia; [Jeffrey, Robert G.] SCT Operat Pty Ltd, Wollongong, NSW, Austr…	Yang, JP; Zhang, X (corresponding author), Chinese Acad Sci, Inst Rock & Soil Mech, State Key Lab Geomech & Geotech Engn, Wuhan, Peoples R China.; Yang, JP (corresponding author), Univ Chinese Acad Sci, Sch Engn Sci, Beijing, Peoples R China.; Zhang, X (corresponding author), CSIRO Energy, Melbourne, Vic, Australia.	jpyang@whrsm.ac.cn; xi.zhang@csiro.au	; Zhang, Xi/D-4584-2009	Zhang, Fengshou/0000-0002-4998-6259; Zhang, Xi/0000-0002-3313-8095	National Natural Science Foundation of ChinaNational Natural Science Foundation of China (NSFC) [U1765108, U1806226]; Chinese Fundamental Research (973) Program [2015CB057906]; Youth Innovation Promotion Association of the Chinese Academy of Sciences; Open Research Fund by the State Key Laboratory of Geomechanics and Geotechnical Engineering [Z018003]	We thank the Associate Editor and four anonymous reviewers for their helpful comments that greatly improved the manuscript. J.Y., D.Y., W.C., and Q.S. gratefully acknowledge the supports of the National Natural Science Foundation of China (grant U1765108, U1806226), the Chinese Fundamental Research (973) Program through grant 2015CB057906, the Youth Innovation Promotion Association of the Chinese…	ANDREWS DJ, 1976, J GEOPHYS RES, V81, P3575, DOI 10.1029/JB081i020p03575; Bizzarri A, 2003, J GEOPHYS RES-SOL EA, V108, DOI 10.1029/2002JB002198; Boeg-Jensen P.K., 2017, 9 INT S ROCKB SEISM; Burgmann R, 2018, EARTH PLANET SC LETT, V495, P112, DOI 10.1016/j.epsl.2018.04.062; Cocco M, 2009, INT GEOPHYS SER, V94, P163; Cooke ML, 2014, J STRUCT GEOL, V66, P334, DOI 10.1016/j.jsg.2014.05.004; DAY SM, …	53	0	0	5	5	AMER GEOPHYSICAL UNION	WASHINGTON	2000 FLORIDA AVE NW, WASHINGTON, DC 20009 USA	2169-9313	2169-9356		J GEOPHYS RES-SOL EA	J. Geophys. Res.-Solid Earth	OCT	2020	125	10
J	Molenda, T; Frydecka, K				Molenda, Tadeusz; Frydecka, Kinga			Physical and chemical properties of natural and anthropogenic groundwater outflows in the cieszyn foothills	ECOHYDROLOGY & HYDROBIOLOGY			English	Article						Springs; Mine water; Water adit; Hydrochemistry; Iron ore		The purpose of this article is to present the hydrographic and hydrochemical properties of the waters of old adits, which drained excavations after exploitation of iron ores. For this research, both the natural springs and control object have been identified. These are located in the Cieszyn Foothills. It has been shown that adit water has a higher average electrolytic conductivity (> 600 mu S/cm…	[Molenda, Tadeusz] Univ Silesia, Fac Nat Sci, Ul Bedzinska 60, PL-41200 Sosnowiec, Poland; [Frydecka, Kinga] Univ Silesia, Fac Nat Sci, Ul Jagiellonska 28, PL-40032 Katowice, Poland	Frydecka, K (corresponding author), Univ Silesia, Fac Nat Sci, Ul Jagiellonska 28, PL-40032 Katowice, Poland.	tedimolenda@interia.pl; kfrydecka@o2.pl		Molenda, Tadeusz/0000-0003-3000-8460			Griffiths D., 2010, HEAD 1 STAT, P712; Gutry-Korycka M., 1996, GUIDE HYDROGRAPHICAL, P275; Kondracki J., 1998, REGIONAL GEOGRAPHY P; Krause R., 2015, INZYNIERIA EKOLOGICZ, V45, P36; Macioszczyk A., 1983, HYDROGEOCHEMISTRY, P475; Migaszewski Z.M., 2016, BASICS ENV GEOCHEMIS, P637; Molenda T., 2011, NATURAL ANTHROPOGENI, P135; Molenda T., 2016, INZYNIERIA EKOLOGICZ, V49, P168; Molenda T., 2007, ANT…	13	0	0	0	0	INT CENTRE ECOLOGY, POLISH ACAD SCIENCES	LOMIANKI	DZIEKANOW LESNY, LOMIANKI, 00000, POLAND	1642-3593	2080-3397		ECOHYDROL HYDROBIOL	Ecohydrol. Hydrobiol.	OCT	2020	20	4
J	Mo, JL; Flores, G; Inui, T; Katsumi, T				Mo, Jialin; Flores, Giancarlo; Inui, Toru; Katsumi, Takeshi			Hydraulic and sorption performances of soil amended with calcium-magnesium composite powder against natural arsenic contamination	SOILS AND FOUNDATIONS			English	Article						Sorption layer method; Calcium-magnesium composite; Natural arsenic contamination; Hydraulic conductivity; Sorption	DOLOMITE; ADSORPTION; RISK; LEAD	Excavated soils and rocks, containing toxic metals and/or metalloids from geogenic sources, are usually generated in huge volumes at construction sites. And the post-excavation leaching of these toxic metals and/or metalloids with low concentrations, but higher than the environmental standards, is a major environmental concern. A sorption layer method was developed as a cost-effective countermeas…	[Mo, Jialin] Natl Inst Environm Studies, Fukushima Branch, Fukushima, Japan; [Flores, Giancarlo] Univ Ingn & Tecnol, Dept Civil Engn, Lima, Peru; [Inui, Toru] Osaka Univ, Grad Sch Engn, Osaka, Japan; [Katsumi, Takeshi] Kyoto Univ, Grad Sch Global Environm Studies, Kyoto, Japan	Mo, JL (corresponding author), Natl Inst Environm Studies, Fukushima Branch, Fukushima, Japan.	mo.jialin@nies.go.jp; gfloresb@utec.edu.pe; inui@civil.eng.osaka-u.ac.jp; katsumi.takeshi.6v@kyoto-u.ac.jp		Mo, Jialin/0000-0002-2151-0806			Albadarin AB, 2012, CHEM ENG J, V179, P193, DOI 10.1016/j.cej.2011.10.080; Ayoub GM, 2007, J HAZARD MATER, V148, P259, DOI 10.1016/j.jhazmat.2007.02.011; Chaudhary V, 2015, ANAL METHODS-UK, V7, P8304, DOI [10.1039/c5ay01044f, 10.1039/C5AY01044F]; Cremisini C, 2016, REND LINCEI-SCI FIS, V27, P7, DOI 10.1007/s12210-015-0457-7; Cui JL, 2018, ENVIRON POLLUT, V232, P375, DOI 10.1016/j.envpol.2017.09.0…	32	0	0	1	1	JAPANESE GEOTECHNICAL SOC	TOKYO	SUGAYAMA BLDG 4F, KANDA AWAJI-CHO 2-23, CHIYODA-KU, TOKYO, 101-0063, JAPAN	0038-0806			SOILS FOUND	Soils Found.	OCT	2020	60	5
J	Akdag, S; Karakus, M; Nguyen, GD; Taheri, A				Akdag, Selahattin; Karakus, Murat; Nguyen, Giang D.; Taheri, Abbas			Strain burst vulnerability criterion based on energy-release rate	ENGINEERING FRACTURE MECHANICS			English	Article						Strain burst; Fracture toughness; Temperature effect; Rate dependence; Chevron notch; Semicircular bend specimen	I FRACTURE-TOUGHNESS; STRESS INTENSITY FACTORS; ISRM-SUGGESTED METHOD; THERMAL-TREATMENT; ROCK; TEMPERATURE; SPECIMENS; CCNBD	Violent rock failures such as strain burst are significant issues during excavations in rock mass under the influence of high stress and temperature. Triggering mechanism of strain burst is associated with the intrinsic rock properties, e.g. fracture toughness. Understanding the fracturing behaviours of rocks is, therefore, significant for assessing the stability of underground rock engineering s…	[Akdag, Selahattin; Karakus, Murat; Nguyen, Giang D.; Taheri, Abbas] Univ Adelaide, Sch Civil Environm & Min Engn, Adelaide, SA, Australia	Akdag, S (corresponding author), Univ Adelaide, Sch Civil Environm & Min Engn, Adelaide, SA, Australia.	selahattin.akdag@adelaide.edu.au			Australian Research Council (ARC)Australian Research Council [ARC-LP150100539]; OZ Minerals	The authors gratefully acknowledge the financial support from the Australian Research Council (ARC) (ARC-LP150100539), OZ Minerals. The authors would also like to acknowledge the laboratory staff, in particular, Adam Ryntjes and Simon Golding.	Akdag S, 2021, UNDERGR SPACE, V6, P1, DOI 10.1016/j.undsp.2019.08.002; Akdag S, 2018, ROCK MECH ROCK ENG, V51, P1657, DOI 10.1007/s00603-018-1415-3; [Anonymous], 1988, INT J ROCK MECH MIN, V25, P71; Ayatollahi MR, 2016, ROCK MECH ROCK ENG, V49, P1161, DOI 10.1007/s00603-015-0830-y; Berto F., 2017, ENG SOLID MECH, V5, P167, DOI DOI 10.5267/J.ESM.2017.6.002; Bluhm J. I., 1975, Engineering Fracture …	31	1	1	8	8	PERGAMON-ELSEVIER SCIENCE LTD	OXFORD	THE BOULEVARD, LANGFORD LANE, KIDLINGTON, OXFORD OX5 1GB, ENGLAND	0013-7944	1873-7315		ENG FRACT MECH	Eng. Fract. Mech.	OCT 1	2020	237
J	Chen, SJ; Feng, F; Wang, YJ; Li, DY; Huang, WP; Zhao, XD; Jiang, N				Chen, Shao-jie; Feng, Fan; Wang, Ya-jun; Li, Di-yuan; Huang, Wan-peng; Zhao, Xing-dong; Jiang, Ning			Tunnel failure in hard rock with multiple weak planes due to excavation unloading of in-situ stress	JOURNAL OF CENTRAL SOUTH UNIVERSITY			English	Article						rock tunnel; weak planes; excavation unloading; crack propagation; energy evolution; finite element method; discrete element method (FEM; DEM)	INTERMEDIATE PRINCIPAL STRESS; DISCRETE ELEMENT METHOD; STRUCTURAL PLANES; ROCKBURST; MECHANISM; STRENGTH; MASS; SIMULATION; SANDSTONE; FISSURES	Natural geological structures in rock (e.g., joints, weakness planes, defects) play a vital role in the stability of tunnels and underground operations during construction. We investigated the failure characteristics of a deep circular tunnel in a rock mass with multiple weakness planes using a 2D combined finite element method/discrete element method (FEM/DEM). Conventional triaxial compression …	[Chen, Shao-jie; Feng, Fan; Huang, Wan-peng; Jiang, Ning] Shandong Univ Sci & Technol, Coll Energy & Min Engn, Qingdao 266590, Peoples R China; [Feng, Fan; Wang, Ya-jun] China Univ Min & Technol Beijing, State Key Lab Geomech & Deep Underground Engn, Beijing 100083, Peoples R China; [Feng, Fan; Zhao, Xing-dong] Northeastern Univ, Sch Resources & Civil Engn, Shenyang 110819, Peoples R China; [Li, …	Feng, F (corresponding author), Shandong Univ Sci & Technol, Coll Energy & Min Engn, Qingdao 266590, Peoples R China.; Feng, F (corresponding author), China Univ Min & Technol Beijing, State Key Lab Geomech & Deep Underground Engn, Beijing 100083, Peoples R China.; Feng, F (corresponding author), Northeastern Univ, Sch Resources & Civil Engn, Shenyang 110819, Peoples R China.	fengfan0213@sdust.edu.cn					Cai M, 2008, INT J ROCK MECH MIN, V45, P763, DOI 10.1016/j.ijrmms.2007.07.026; Cai M, 2014, ROCK MECH ROCK ENG, V47, P659, DOI 10.1007/s00603-013-0437-0; Cai M, 2013, ROCK MECH ROCK ENG, V46, P289, DOI 10.1007/s00603-012-0331-1; Chalivendra VB, 2009, INT J IMPACT ENG, V36, P888, DOI 10.1016/j.ijimpeng.2008.11.009; Chen JT, 2020, PURE APPL GEOPHYS, V177, P5325, DOI 10.1007/s00024-020-02550-9; Chen…	55	0	0	13	13	JOURNAL OF CENTRAL SOUTH UNIV	HUNAN	EDITORIAL OFF, CHANGSHA, CHINA MAINLAND, HUNAN 410083, PEOPLES R CHINA	2095-2899	2227-5223		J CENT SOUTH UNIV	J. Cent. South Univ.	OCT	2020	27	10			SI
J	Liu, CY; Zhao, GM; Xu, WS; Meng, XR; Huang, SJ; Zhou, J; Wang, YK				Liu, Chong-yan; Zhao, Guang-ming; Xu, Wen-song; Meng, Xiang-rui; Huang, Shun-jie; Zhou, Jun; Wang, Yun-kun			Experimental investigation on failure process and spatio-temporal evolution of rockburst in granite with a prefabricated circular hole	JOURNAL OF CENTRAL SOUTH UNIVERSITY			English	Article						rockburst; acoustic emission; spatio-temporal evolution; thermal imaging	ACOUSTIC-EMISSION; TRIAXIAL COMPRESSION; TUNNEL-EXCAVATION; COAL SAMPLES; ROCK; STRESS; DAMAGE; CRACKING; TESTS; ZONE	To study the mechanism of rockburst and its spatio-temporal evolution criterion, a rockburst simulation experiment was performed on granite specimens, each with a prefabricated circular hole, under different lateral loads. Using micro camera, acoustic emission (AE) system, and infrared thermal imager, the AE characteristics and thermal radiation temperature migration were studied during the rockb…	[Liu, Chong-yan; Zhao, Guang-ming; Xu, Wen-song; Meng, Xiang-rui; Huang, Shun-jie; Zhou, Jun] Anhui Univ Sci & Technol, State Key Lab Min Response & Disaster Prevent & C, Huainan 232001, Peoples R China; [Liu, Chong-yan; Zhao, Guang-ming; Xu, Wen-song; Meng, Xiang-rui; Huang, Shun-jie; Zhou, Jun] Anhui Univ Sci & Technol, Sch Min & Safety Engn, Huainan 232001, Peoples R China; [Wang, Yun-kun] Uni…	Zhao, GM (corresponding author), Anhui Univ Sci & Technol, State Key Lab Min Response & Disaster Prevent & C, Huainan 232001, Peoples R China.; Zhao, GM (corresponding author), Anhui Univ Sci & Technol, Sch Min & Safety Engn, Huainan 232001, Peoples R China.	guangmingzhao@163.com					Chang SH, 2004, INT J ROCK MECH MIN, V41, P1069, DOI 10.1016/j.ijrmms.2004.04.006; Du K, 2016, ROCK MECH ROCK ENG, V49, P3437, DOI 10.1007/s00603-016-0990-4; Feng XT, 2017, ENGINEERING-PRC, V3, P538, DOI 10.1016/J.ENG.2017.04.013; Gong FQ, 2019, B ENG GEOL ENVIRON, V78, P5445, DOI 10.1007/s10064-019-01474-6; Gong FQ, 2019, ROCK MECH ROCK ENG, V52, P1459, DOI 10.1007/s00603-018-1660-5; Hu XC, 2019…	32	0	0	14	14	JOURNAL OF CENTRAL SOUTH UNIV	HUNAN	EDITORIAL OFF, CHANGSHA, CHINA MAINLAND, HUNAN 410083, PEOPLES R CHINA	2095-2899	2227-5223		J CENT SOUTH UNIV	J. Cent. South Univ.	OCT	2020	27	10			SI
J	Li, B; Ding, QF; Xu, NW; Lei, YF; Xu, Y; Zhu, ZP; Liu, JF				Li, Biao; Ding, Quan-fu; Xu, Nu-wen; Lei, Yi-fan; Xu, Yuan; Zhu, Zhong-ping; Liu, Jing-fei			Mechanical response and stability analysis of rock mass in high geostress underground powerhouse caverns subjected to excavation	JOURNAL OF CENTRAL SOUTH UNIVERSITY			English	Article						high geostress; underground powerhouse caverns; microseismic monitoring; discrete element modelling; stability analysis; &#39640; &#22320; &#24212; &#21147; &#22320; &#19979; &#21378; &#25151; &#27934; &#23460; &#32676; &#24494; &#38663; &#30417; &#27979; &#31163; &#25955; &#20803; &#27169; &#25311; &#31283; &#23450; &#24615; &#20998; &#26512	ROCKBURST DEVELOPMENT PROCESSES; HOUZIYAN HYDROPOWER STATION; SURROUNDING ROCK; DEEP TUNNELS; DEFORMATION; STRESS; FAILURE; DAMAGE; ZONE; DISPLACEMENT	To investigate the stability of rock mass in high geostress underground powerhouse caverns subjected to excavation, a microseismic (MS) monitoring system was established and the discrete element method (DEM)-based numerical simulation was carried out. The tempo-spatial damage characteristics of rock mass were analyzed. The evolution laws of MS source parameters during the formation of a rock coll…	[Li, Biao; Ding, Quan-fu] Southwest Petr Univ, Sch Geosci & Technol, Chengdu 610500, Peoples R China; [Xu, Nu-wen; Lei, Yi-fan] Sichuan Univ, State Key Lab Hydraul & Mt River Engn, Coll Water Resource & Hydropower, Chengdu 610065, Peoples R China; [Xu, Yuan] Univ Oxford, Dept Engn Sci, Oxford OX5 1PF, England; [Zhu, Zhong-ping] Sichuan Dadu River Shuangjiangkou Hydropower Dev, Maerkang 624099, Pe…	Xu, NW (corresponding author), Sichuan Univ, State Key Lab Hydraul & Mt River Engn, Coll Water Resource & Hydropower, Chengdu 610065, Peoples R China.	xunuwen@scu.edu.cn					Alejano LR, 1999, INT J ROCK MECH MIN, V36, P475, DOI 10.1016/S0148-9062(99)00022-4; Andersson JC, 2009, INT J ROCK MECH MIN, V46, P865, DOI 10.1016/j.ijrmms.2009.02.010; BOATWRIGHT J, 1984, B SEISMOL SOC AM, V74, P361; Cai M, 2007, INT J ROCK MECH MIN, V44, P550, DOI 10.1016/j.ijrmms.2006.09.013; Cai M, 1998, PURE APPL GEOPHYS, V153, P67, DOI 10.1007/s000240050185; Cai M, 2001, INT J ROCK MECH M…	41	1	1	6	6	JOURNAL OF CENTRAL SOUTH UNIV	HUNAN	EDITORIAL OFF, CHANGSHA, CHINA MAINLAND, HUNAN 410083, PEOPLES R CHINA	2095-2899	2227-5223		J CENT SOUTH UNIV	J. Cent. South Univ.	OCT	2020	27	10			SI
J	Lin, JY; Zuo, YJ; Wang, J; Zheng, LJ; Chen, B; Sun, WJB; Liu, H				Lin, Jian-yun; Zuo, Yu-jun; Wang, Jian; Zheng, Lu-jing; Chen, Bin; Sun, Wen-ji-bin; Liu, Hao			Stability analysis of underground surrounding rock mass based on block theory	JOURNAL OF CENTRAL SOUTH UNIVERSITY			English	Article						key block theory; Unwedge analysis software; stress monitoring system; support evaluation	CAVING FEATURES; DYNAMIC ACTION; MECHANICAL-PROPERTIES; FAILURE-MECHANISM; COAL-MINE; ROADWAY; WORKINGS; SLOPE; IDENTIFICATION; VELOCITY	Evaluation of the performance of existing support in underground tunnels is of great importance for production and interests. Based on field investigation, the shape and number of joints and fractures were investigated in the mining area. Then, the stability of each structural blocks is analyzed by 3D wedge stability analysis software (Unwedge). Moreover, a new analysis method based on critical b…	[Lin, Jian-yun; Zuo, Yu-jun; Zheng, Lu-jing; Chen, Bin; Sun, Wen-ji-bin; Liu, Hao] Guizhou Univ, Min Coll, Guiyang 550025, Peoples R China; [Lin, Jian-yun; Zuo, Yu-jun; Zheng, Lu-jing; Liu, Hao] Guizhou Univ, Sch Resource & Environm Engn, Guiyang 550025, Peoples R China; [Wang, Jian] Cent South Univ, Sch Resources & Safety Engn, Changsha 410083, Peoples R China; [Sun, Wen-ji-bin] Univ Newcastle, …	Zuo, YJ (corresponding author), Guizhou Univ, Min Coll, Guiyang 550025, Peoples R China.; Zuo, YJ (corresponding author), Guizhou Univ, Sch Resource & Environm Engn, Guiyang 550025, Peoples R China.	zuo_yujun@163.com					Chen G, 2012, GEOMECH GEOENGIN, V7, P255, DOI 10.1080/17486025.2011.592609; Cheng GW, 2019, INT J ROCK MECH MIN, V123, DOI 10.1016/j.ijrmms.2019.104096; Dong LJ, 2016, INT J ROCK MECH MIN, V86, P282, DOI 10.1016/j.ijrmms.2016.04.021; Dong LJ, 2017, IEEE ACCESS, V5, P18804, DOI 10.1109/ACCESS.2017.2745705; Dong LJ, 2017, IEEE ACCESS, V5, P16818, DOI 10.1109/ACCESS.2017.2743115; Dong LJ, 2017, IEEE…	44	0	0	11	11	JOURNAL OF CENTRAL SOUTH UNIV	HUNAN	EDITORIAL OFF, CHANGSHA, CHINA MAINLAND, HUNAN 410083, PEOPLES R CHINA	2095-2899	2227-5223		J CENT SOUTH UNIV	J. Cent. South Univ.	OCT	2020	27	10			SI
J	Li, F; You, S; Ji, HG; Elmo, D; Wang, HT				Li, Fei; You, Shuang; Ji, Hong-guang; Elmo, Davide; Wang, Hong-tao			Strength and energy exchange of deep sandstone under high hydraulic conditions	JOURNAL OF CENTRAL SOUTH UNIVERSITY			English	Article						deep sandstone; high hydraulic pressure; mechanical characteristics; energy storage; rock burst proneness	HARD-ROCK; EVOLUTION CHARACTERISTICS; FAILURE; ROCKBURST; STORAGE	To investigate the influence of confining pressure and pore water pressure on strength characteristics, energy storage state and energy release intensity at peak failure of deep sandstone, a series of triaxial compression tests under hydraulic coupling conditions are carried out. By analyzing the process of rock deformation and failure, the stress thresholds of the rock are obtained. The change t…	[Li, Fei; You, Shuang; Ji, Hong-guang; Wang, Hong-tao] Univ Sci & Technol Beijing, Beijing Key Lab Urban Underground Space Engn, Beijing 100083, Peoples R China; [Li, Fei; You, Shuang; Ji, Hong-guang; Wang, Hong-tao] Univ Sci & Technol Beijing, Sch Civil & Resource Engn, Beijing 100083, Peoples R China; [Elmo, Davide] Univ British Columbia, Inst Min Engn, Vancouver, BC V6T 1Z4, Canada	You, S (corresponding author), Univ Sci & Technol Beijing, Beijing Key Lab Urban Underground Space Engn, Beijing 100083, Peoples R China.; You, S (corresponding author), Univ Sci & Technol Beijing, Sch Civil & Resource Engn, Beijing 100083, Peoples R China.	youshuang@ustb.edu.cn	Elmo, Davide/AAK-7757-2021				Cai MF, 2017, ENGINEERING-PRC, V3, P432, DOI 10.1016/J.ENG.2017.04.027; COOKNGW, 1965, INT J ROCK MECH MIN, V2, P389, DOI [10.1016/0148-9062(65)90004-5, DOI 10.1016/0148-9062(65)90004-5]; Cui FP, 2018, MINE WATER ENVIRON, V37, P346, DOI 10.1007/s10230-018-0530-4; Feng XT, 2019, ROCK MECH ROCK ENG, V52, P2109, DOI 10.1007/s00603-018-1700-1; Feng XT, 2017, ENGINEERING-PRC, V3, P538, DOI 10.1016/J.E…	28	0	0	7	7	JOURNAL OF CENTRAL SOUTH UNIV	HUNAN	EDITORIAL OFF, CHANGSHA, CHINA MAINLAND, HUNAN 410083, PEOPLES R CHINA	2095-2899	2227-5223		J CENT SOUTH UNIV	J. Cent. South Univ.	OCT	2020	27	10			SI
J	Yang, JC; Liu, KW; Li, XD; Liu, ZX				Yang, Jia-cai; Liu, Ke-wei; Li, Xu-dong; Liu, Zhi-xiang			Stress initialization methods for dynamic numerical simulation of rock mass with high in-situ stress	JOURNAL OF CENTRAL SOUTH UNIVERSITY			English	Article						in-situ stress; stress initialization method; dynamic disturbance; numerical simulation; rock mass	BLASTING EXCAVATION; DAMAGE; ROCKBURST; MECHANISM; FAILURE; WAVE	In the context of deep rock engineering, the in-situ stress state is of major importance as it plays an important role in rock dynamic response behavior. Thus, stress initialization becomes crucial and is the first step for the dynamic response simulation of rock mass in a high in-situ stress field. In this paper, stress initialization methods, including their principles and operating procedures …	[Yang, Jia-cai; Liu, Ke-wei; Li, Xu-dong; Liu, Zhi-xiang] Cent South Univ, Sch Resources & Safety Engn, Changsha 410083, Peoples R China; [Liu, Ke-wei] Univ Western Australia, Sch Civil & Resource Engn, Perth, WA, Australia	Liu, KW (corresponding author), Cent South Univ, Sch Resources & Safety Engn, Changsha 410083, Peoples R China.; Liu, KW (corresponding author), Univ Western Australia, Sch Civil & Resource Engn, Perth, WA, Australia.	kewei_liu@csu.edu.cn					Ahmed SS, 2017, INT J ROCK MECH MIN, V99, P50, DOI 10.1016/j.ijrmms.2016.04.006; [Anonymous], 2009, VERS 12 1 ANSYS LS D; [Anonymous], 2012, KEYW US MAN, VI; Barnes M., 1999, INT J SPACE STRUCT, V14, P89; BING Dao, 2016, STRESS INITIALIZATIO; Blair DP, 2007, GEOPHYSICS, V72, pE33, DOI 10.1190/1.2424543; BORRVALL T, 2011, 8 EUR LS DYNA C; CARTER JP, 1990, INT J ROCK MECH MIN, V27, P129, DOI 10.101…	52	1	1	5	5	JOURNAL OF CENTRAL SOUTH UNIV	HUNAN	EDITORIAL OFF, CHANGSHA, CHINA MAINLAND, HUNAN 410083, PEOPLES R CHINA	2095-2899	2227-5223		J CENT SOUTH UNIV	J. Cent. South Univ.	OCT	2020	27	10			SI
J	Greenberger, RN; Ehlmann, BL; Osinski, GR; Tornabene, LL; Green, RO				Greenberger, Rebecca N.; Ehlmann, Bethany L.; Osinski, Gordon R.; Tornabene, Livio L.; Green, Robert O.			Compositional Heterogeneity of Impact Melt Rocks at the Haughton Impact Structure, Canada: Implications for Planetary Processes and Remote Sensing	JOURNAL OF GEOPHYSICAL RESEARCH-PLANETS			English	Article						Haughton; hyperspectral imaging; imaging spectroscopy; impact crater; impact melt	INDUCED HYDROTHERMAL ACTIVITY; DEVON ISLAND; REFLECTANCE SPECTROSCOPY; SPECTRAL REFLECTANCE; RIES CRATER; CARBONATE MINERALS; MU-M; MARS; PETROLOGY; GERMANY	Connecting the surface expression of impact crater-related lithologies to planetary or regional subsurface compositions requires an understanding of material transport during crater formation. Here, we use imaging spectroscopy of six clast-rich impact melt rock outcrops within the well-preserved 23.5-Ma, 23-km diameter Haughton impact structure, Canada, to determine melt rock composition and spat…	[Greenberger, Rebecca N.; Ehlmann, Bethany L.] CALTECH, Div Geol & Planetary Sci, Pasadena, CA 91125 USA; [Ehlmann, Bethany L.; Green, Robert O.] CALTECH, Jet Prop Lab, Pasadena, CA USA; [Osinski, Gordon R.; Tornabene, Livio L.] Univ Western Ontario, Dept Earth Sci, London, ON, Canada; [Osinski, Gordon R.; Tornabene, Livio L.] Univ Western Ontario, Inst Earth & Space Explorat, London, ON, Canada;…	Greenberger, RN (corresponding author), CALTECH, Div Geol & Planetary Sci, Pasadena, CA 91125 USA.	rgreenbe@caltech.edu		Ehlmann, Bethany/0000-0002-2745-3240; Greenberger, Rebecca/0000-0003-1583-0261; Osinski, Gordon/0000-0002-1832-5925	NASA Postdoctoral Program Fellowship; Barringer Family Fund; Rose Hills Foundation; NASA Planetary Major Equipment grant [NNX13AG74G]; Natural Sciences and Engineering Research Council of CanadaNatural Sciences and Engineering Research Council of Canada (NSERC)CGIAR	We gratefully acknowledge the other members of the field team (Chris Carr, Byung-Hun Choe, Shamus Duff, Etienne Godin, Anna Grau, Elise Harrington, Mark Jellinek, Anterro Kukko, Catherine Neish, Jen Newman, Alex Pontefract, and Mike Zanetti), especially for packing up camp to allow us to image two last sites, while twin otters were en route during a sudden early pullout on the first cloudless day…	ADAMS JB, 1986, J GEOPHYS RES-SOLID, V91, P8098, DOI 10.1029/JB091iB08p08098; ADAMS JB, 1995, REMOTE SENS ENVIRON, V52, P137, DOI 10.1016/0034-4257(94)00098-8; AINES RD, 1984, J GEOPHYS RES, V89, P4059, DOI 10.1029/JB089iB06p04059; ANDERSON JH, 1964, SURF SCI, V2, P252, DOI 10.1016/0039-6028(64)90064-0; Arvidson RE, 2014, SCIENCE, V343, DOI 10.1126/science.1248097; Bibring JP, 2005, SCIENCE, V307…	99	0	0	1	1	AMER GEOPHYSICAL UNION	WASHINGTON	2000 FLORIDA AVE NW, WASHINGTON, DC 20009 USA	2169-9097	2169-9100		J GEOPHYS RES-PLANET	J. Geophys. Res.-Planets	OCT	2020	125	10
J	Ma, CD; Xie, WB; Liu, ZL; Li, QY; Xu, JQ; Tan, GS				Ma, Chunde; Xie, Weibin; Liu, Zelin; Li, Qiyue; Xu, Jiaqing; Tan, Guanshuang			A New Technology for Smooth Blasting without Detonating Cord for Rock Tunnel Excavation	APPLIED SCIENCES-BASEL			English	Article						rock tunnel excavation; smooth blasting; sympathetic detonation; critical distance; new charging structure; no detonating cord	SYMPATHETIC DETONATION; CONSTRUCTION	Featured Application For the first time, we successfully measured the critical distance of rock emulsion explosive under the constraint of blasthole, which was about 1.0 similar to 1.1 m. Based on the critical distance, a smooth blasting technology without detonating cord was designed, which can achieve the purpose of simplifying the working procedure, saving costs and improving efficiency. In th…	[Ma, Chunde; Xie, Weibin; Li, Qiyue; Xu, Jiaqing; Tan, Guanshuang] Cent South Univ, Sch Resources & Safety Engn, Changsha 410083, Peoples R China; [Ma, Chunde] Cent South Univ, Adv Res Ctr, Changsha 410083, Peoples R China; [Liu, Zelin] Cent South Univ, Sch Civil Engn, Changsha 410075, Peoples R China	Liu, ZL (corresponding author), Cent South Univ, Sch Civil Engn, Changsha 410075, Peoples R China.	cdma@csu.edu.cn; weibin@csu.edu.cn; zelinl@csu.edu.cn; qyli@csu.edu.cn; xu1001@csu.edu.cn; tanguanshuang@csu.edu.cn		Liu, Zelin/0000-0002-5794-8690	Major Science and Technology Project of Xinjiang Uygur Autonomous Region [2018A03003, 2018A03003-2]; Fundamental Research Funds for the Central Universities of Central South University [2019zzts676]	This research was funded by the Major Science and Technology Project of Xinjiang Uygur Autonomous Region, grant number 2018A03003, the Research on Mechanized Safety and Rapid Construction Technology of Extra-long Highway Tunnel, grant number 2018A03003-2, and the Fundamental Research Funds for the Central Universities of Central South University, grant number 2019zzts676.	Chen L, 2013, DEF TECHNOL, V9, P224, DOI 10.1016/j.dt.2013.12.002; Chen Q.K., 2017, MIN RES DEV, V37, P45; DeFisher S., 2006, P INS MUN EN MAT TEC, P937; Ding LY, 2014, SAFETY SCI, V62, P8, DOI 10.1016/j.ssci.2013.07.021; Dong LJ, 2020, J CLEAN PROD, V257, DOI 10.1016/j.jclepro.2020.120899; FOURNEY WL, 1981, INT J ROCK MECH MIN, V18, P113, DOI 10.1016/0148-9062(81)90737-3; Hu YG, 2014, ROCK MECH …	31	0	0	5	5	MDPI	BASEL	ST ALBAN-ANLAGE 66, CH-4052 BASEL, SWITZERLAND		2076-3417		APPL SCI-BASEL	Appl. Sci.-Basel	OCT	2020	10	19
J	Mohyla, M; Vojtasik, K; Hrubesova, E; Stolarik, M; Nedoma, J; Pinka, M				Mohyla, Marek; Vojtasik, Karel; Hrubesova, Eva; Stolarik, Martin; Nedoma, Jan; Pinka, Miroslav			Approach for Optimisation of Tunnel Lining Design	APPLIED SCIENCES-BASEL			English	Article						tunnel construction; tunnel lining; shotcrete; material homogenisation; numerical modelling	NATM TUNNEL; SHOTCRETE; STEEL; 2D	This paper presents an approach that enables the specific characteristics of a primary tunnel lining implemented using numerical modelling to be taken into account during its design. According to the fundamental principles of the New Austrian Tunnelling Method, the primary lining undergoes time-dependent deformation, which is determined by its design. The main design element is shotcrete, which, …	[Mohyla, Marek; Vojtasik, Karel; Hrubesova, Eva; Stolarik, Martin; Pinka, Miroslav] VSB Tech Univ Ostrava, Dept Geotech & Underground Engn, Fac Civil Engn, Ludvika Podeste 1875-17, Ostrava 70800, Czech Republic; [Nedoma, Jan] VSB Tech Univ Ostrava, Dept Telecommun, Fac Elect Engn & Comp Sci, 17 Listopadu 15, Ostrava 70833, Czech Republic	Mohyla, M (corresponding author), VSB Tech Univ Ostrava, Dept Geotech & Underground Engn, Fac Civil Engn, Ludvika Podeste 1875-17, Ostrava 70800, Czech Republic.; Nedoma, J (corresponding author), VSB Tech Univ Ostrava, Dept Telecommun, Fac Elect Engn & Comp Sci, 17 Listopadu 15, Ostrava 70833, Czech Republic.	marek.mohyla@vsb.cz; karel.vojtasik@vsb.cz; eva.hrubesova@vsb.cz; martin.stolarik@vsb.cz; jan.nedoma@vsb.cz; miroslav.pinka@vsb.cz	Hrubesova, Eva/V-2708-2017; Mohyla, Marek/S-2215-2016; Stolarik, Martin/X-6709-2018	Hrubesova, Eva/0000-0003-0981-8354; Mohyla, Marek/0000-0001-9649-5244; Nedoma, Jan/0000-0001-7459-2043; Stolarik, Martin/0000-0002-6062-6270; Pinka, Miroslav/0000-0003-3641-8444; Vojtasik, Karel/0000-0002-1801-1360	Ministry of Education, Youth and Sports of the Czech RepublicMinistry of Education, Youth & Sports - Czech Republic [SP2020/156]	This study was founded by conceptual and specific research development at VSB-Technical University of Ostrava in 2019 and 2020 provided by the Ministry of Education, Youth and Sports of the Czech Republic and also by the project No. SP2020/156.	Aldorf J., 2009, INF CZECH ASS CIV EN, V15, P27; [Anonymous], 2011, 199211731201 CSN; [Anonymous], 2006, 19971731000 EUR STAN; Behnen G, 2015, GEOTECHNIK, V38, P96, DOI 10.1002/gete.201400010; BULYTCHEV NS, 1994, GEOMECHANICS 93, P3; Carranza-Torres C, 2009, TUNN UNDERGR SP TECH, V24, P506, DOI 10.1016/j.tust.2009.02.001; ELNAHHAS F, 1992, TUNN UNDERGR SP TECH, V7, P33, DOI 10.1016/0886-7798(92)9…	39	0	0	8	8	MDPI	BASEL	ST ALBAN-ANLAGE 66, CH-4052 BASEL, SWITZERLAND		2076-3417		APPL SCI-BASEL	Appl. Sci.-Basel	OCT	2020	10	19
J	Wang, Y; Shang, XY; Wang, ZW; Gao, R				Wang, Yi; Shang, Xueyi; Wang, Zewei; Gao, Rui			High-Accuracy Location of Microseismic Events in a Strong Inhomogeneous Mining Environment by Optimized Global Full Waveform Inversion	APPLIED SCIENCES-BASEL			English	Article						microseismic (MS) monitoring; MS source location; waveform inversion; multi-scale grid-search; 3D velocity	SPECTRAL-ELEMENT METHOD; VELOCITY MODEL; GROUND MOTION; EARTHQUAKES; FAULT; TIME; TOMOGRAPHY; COMPONENT; NETWORKS	High-accuracy determination of a microseismic (MS) location is the core task in MS monitoring. In this study, a 3D multi-scale grid Green's function database, depending on recording wavefield frequency band for the target mining area, is pre-generated based on the reciprocity theorem and 3D spectral element method (SEM). Then, a multi-scale global grid search strategy is performed based on this p…	[Wang, Yi; Wang, Zewei; Gao, Rui] Sun Yat Sen Univ, Sch Earth Sci & Engn, Guangzhou 510275, Peoples R China; [Shang, Xueyi] Chongqing Univ, Sch Resource & Safety Engn, State Key Lab Coal Mine Disaster Dynam & Control, Chongqing 400044, Peoples R China	Shang, XY (corresponding author), Chongqing Univ, Sch Resource & Safety Engn, State Key Lab Coal Mine Disaster Dynam & Control, Chongqing 400044, Peoples R China.	ghostzzz@mail.ustc.edu.cn; shangxueyi@cqu.edu.cn; wangzw.csu@gmail.com; ruigao126@126.com			National Natural Science Foundation of China (NSFC)National Natural Science Foundation of China (NSFC) [52004041, 41804045]; China Postdoctoral Science FoundationChina Postdoctoral Science Foundation [2020T130757]; Basic Scientific Research Operating Expenses of Central Universities [2020CDJQY-A047]; Chognqing Postdoctoral Science Foundation [cstc2020jcyj-bshX0106]	This research was funded by the National Natural Science Foundation of China (NSFC) under Grant 52004041 and Grant 41804045, the China Postdoctoral Science Foundation under Grant 2020T130757, the Basic Scientific Research Operating Expenses of Central Universities under Grant 2020CDJQY-A047, and Chognqing Postdoctoral Science Foundation under Grant cstc2020jcyj-bshX0106.	Bignardi S, 2012, B SEISMOL SOC AM, V102, P802, DOI 10.1785/0120110091; BOUCHON M, 1976, GEOPHYS J ROY ASTR S, V47, P515, DOI 10.1111/j.1365-246X.1976.tb07099.x; Cesca S, 2014, GEOPHYS J INT, V198, P941, DOI 10.1093/gji/ggu172; Dong LJ, 2019, SHOCK VIB, V2019, DOI 10.1155/2019/9732606; Dong LJ, 2019, ENG FRACT MECH, V210, P95, DOI 10.1016/j.engfracmech.2018.01.032; Dong LJ, 2017, IEEE ACCESS, V5,…	63	0	0	4	4	MDPI	BASEL	ST ALBAN-ANLAGE 66, CH-4052 BASEL, SWITZERLAND		2076-3417		APPL SCI-BASEL	Appl. Sci.-Basel	OCT	2020	10	20
J	Lin, QB; Cao, P; Meng, JJ; Cao, RH; Zhao, ZY				Lin, Qibin; Cao, Ping; Meng, Jingjing; Cao, Rihong; Zhao, Zhiye			Strength and failure characteristics of jointed rock mass with double circular holes under uniaxial compression: Insights from discrete element method modelling	THEORETICAL AND APPLIED FRACTURE MECHANICS			English	Article						Jointed rock mass; Double circular hole; Strength; Failure mode; Uniaxial compression; DEM	CRACK EVOLUTION MECHANISM; NON-PERSISTENT JOINTS; SANDSTONE SPECIMENS; FRACTURE EVOLUTION; BEHAVIOR; COALESCENCE; PROPAGATION; GRANITE; FLAWS	Underground projects are typically performed in nonpersistent jointed rock masses. Excavation of tunnels or chambers causes crack initiation, propagation and coalescence, resulting in the instability and destruction of surrounding rocks. The failure behaviour of rocks is complicated owing to the interaction between holes and joints. Therefore, understanding the failure characteristics of holes in…	[Lin, Qibin; Cao, Ping; Cao, Rihong] Cent South Univ, Sch Resources & Safety Engn, Changsha 410083, Peoples R China; [Lin, Qibin; Zhao, Zhiye] Nanyang Technol Univ, Sch Civil & Environm Engn, Singapore 639798, Singapore; [Meng, Jingjing] Lulea Univ Technol, Dept Civil Environm & Nat Resources Engn, Lulea, Sweden	Meng, JJ (corresponding author), Lulea Univ Technol, Dept Civil Environm & Nat Resources Engn, Lulea, Sweden.	jingjing.meng@ltu.se	Lin, Qibin/AAI-6977-2020	Lin, Qibin/0000-0001-7916-2739; Meng, Jingjing/0000-0003-0148-9779	National Natural Science Foundation of ChinaNational Natural Science Foundation of China (NSFC) [11772358, 51174228]; Water Conservancy Science and Technology Major Project of Hunan Province, China [XSKJ2019081-10]	This research was supported by the National Natural Science Foundation of China (Grant Nos. 11772358, 51174228) and the Water Conservancy Science and Technology Major Project of Hunan Province, China (Grant No. XSKJ2019081-10). The authors are very grateful for the editor and the anonymous reviewers' valuable comments.	Bahaaddini M, 2013, COMPUT GEOTECH, V49, P206, DOI 10.1016/j.compgeo.2012.10.012; Bobet A, 1998, INT J ROCK MECH MIN, V35, P863, DOI 10.1016/S0148-9062(98)00005-9; Cao P, 2015, ENG GEOL, V187, P113, DOI 10.1016/j.enggeo.2014.12.010; Cao RH, 2018, ARCH CIV MECH ENG, V18, P198, DOI 10.1016/j.acme.2017.06.010; Cao RH, 2016, ROCK MECH ROCK ENG, V49, P4319, DOI 10.1007/s00603-016-1029-6; Cao RH, 2020,…	54	13	13	7	7	ELSEVIER	AMSTERDAM	RADARWEG 29, 1043 NX AMSTERDAM, NETHERLANDS	0167-8442	1872-7638		THEOR APPL FRACT MEC	Theor. Appl. Fract. Mech.	OCT	2020	109
J	Liu, B; Zhou, Y; Gao, YT; Xu, CS				Liu, Bing; Zhou, Yu; Gao, Yong-Tao; Xu, Chaoshui			Experimental and numerical study on crack development characteristics between two cavities in rock-like material under uniaxial compression	THEORETICAL AND APPLIED FRACTURE MECHANICS			English	Article						Failure mechanism of rocks with multiple cavities; Failure process modelling using discrete element method (DEM); Displacement vectors of crack development; Clustering analysis for crack detection	BONDED-PARTICLE MODEL; TOMOGRAPHY CT EXPERIMENTS; FRACTURE EVOLUTION; ACOUSTIC-EMISSION; FAILURE BEHAVIOR; DAMAGE EVOLUTION; MOLDED GYPSUM; SANDSTONE; GRANITE; DEFORMATION	The understanding of failure mechanisms of rocks containing multiple cavities is important for stability assessment of rock excavations in rock engineering applications. However, published research is still limited on the failure mechanism between cavities and quantitative assessment of the crack development characteristics for different cavity configurations. In this research, specimens containi…	[Liu, Bing; Zhou, Yu; Gao, Yong-Tao] Univ Sci & Technol Beijing, Key Lab, Minist Educ Efficient Min & Safety Met Mine, Beijing 100083, Peoples R China; [Xu, Chaoshui] Univ Adelaide, Sch Civil Environm & Min Engn, Adelaide, SA 5005, Australia; [Xu, Chaoshui] Wuhan Univ Sci & Technol, Sch Resource & Environm Engn, Wuhan, Peoples R China	Zhou, Y (corresponding author), Univ Sci & Technol Beijing, Key Lab, Minist Educ Efficient Min & Safety Met Mine, Beijing 100083, Peoples R China.	westboy85@ustb.edu.cn			National Natural Science Foundation of ChinaNational Natural Science Foundation of China (NSFC) [51504016]; Fundamental Research Funds for Central UniversitiesFundamental Research Funds for the Central Universities [FRF-TP-18- 016A3]; China Scholarship CouncilChina Scholarship Council [201806460044]	This work was supported by the National Natural Science Foundation of China (Grant No. 51504016) and the Fundamental Research Funds for Central Universities (Grant No. FRF-TP-18- 016A3). The first author would also like to express his gratitude to the China Scholarship Council (No. 201806460044).	Anderson T., 2003, INTRO MULTIVARIATE S; Bewley A., 2013, AUSTR C ROB AUT SYDN; Bobet A., 1997, FRACTURE COALESCENCE; CARTER BJ, 1992, INT J FRACTURE, V57, P221; CARTER BJ, 1991, INT J NUMER ANAL MET, V15, P21, DOI 10.1002/nag.1610150103; CARTER BJ, 1992, ROCK MECH ROCK ENG, V25, P167, DOI 10.1007/BF01019710; CHENG YZ, 1995, IEEE T PATTERN ANAL, V17, P790, DOI 10.1109/34.400568; Cho N, 2007, INT …	60	1	1	17	17	ELSEVIER	AMSTERDAM	RADARWEG 29, 1043 NX AMSTERDAM, NETHERLANDS	0167-8442	1872-7638		THEOR APPL FRACT MEC	Theor. Appl. Fract. Mech.	OCT	2020	109
J	Zhao, R; Tao, M; Zhao, HT; Cao, WZ; Li, XB; Wang, SF				Zhao, Rui; Tao, Ming; Zhao, Huatao; Cao, Wenzhuo; Li, Xibing; Wang, Shaofeng			Dynamics fracture characteristics of cylindrically-bored granodiorite rocks under different hole size and initial stress state	THEORETICAL AND APPLIED FRACTURE MECHANICS			English	Article						Cylindrically-bored granodiorite; Dynamic stress concentration; Impact loading; Initial stress	CIRCULAR LINED TUNNEL; IMPERFECT INTERFACE; BURIED TUNNELS; EVOLUTION; RATIO; EXCAVATION; INCIDENT	A modified Split Hopkinson pressure bar (SHPB) was used to carry out dynamic and static combined loading on prefabricated granite samples. Meanwhile, digital image correlation (DIC) technology was used to evaluate the failure mode of samples with different cylinder hole sizes under different loading conditions. In addition, the dynamic failure characteristics of different circular tunnel radii we…	[Zhao, Rui; Tao, Ming; Zhao, Huatao; Li, Xibing; Wang, Shaofeng] Cent South Univ, Sch Resources & Safety Engn, Changsha, Hunan, Peoples R China; [Cao, Wenzhuo] Imperial Coll, Royal Sch Mines, Dept Earth Sci & Engn, London, England	Tao, M (corresponding author), Cent South Univ, Sch Resources & Safety Engn, Changsha, Hunan, Peoples R China.	mingtao@csu.edu.cn			National Natural Science Foundation of ChinaNational Natural Science Foundation of China (NSFC) [11772357, 41630642]; Fundamental Research Funds for the Central Universities of Central South University [2020zzts708]	The research presented in this paper was supported by the National Natural Science Foundation of China (Grant No. 11772357, 41630642) and the Fundamental Research Funds for the Central Universities of Central South University (Grant No. 2020zzts708).	Cao WZ, 2016, TUNN UNDERGR SP TECH, V53, P78, DOI 10.1016/j.tust.2016.01.017; CARTER BJ, 1992, ROCK MECH ROCK ENG, V25, P167, DOI 10.1007/BF01019710; Daryadel SS, 2016, J NON-CRYST SOLIDS, V432, P432, DOI 10.1016/j.jnoncrysol.2015.10.043; Deng J, 2019, J ROCK MECH GEOTECH, V11, P944, DOI 10.1016/j.jrmge.2019.02.005; Fan ZF, 2019, COMPUT GEOTECH, V110, P308, DOI 10.1016/j.compgeo.2019.02.026; Gerc…	39	0	0	18	18	ELSEVIER	AMSTERDAM	RADARWEG 29, 1043 NX AMSTERDAM, NETHERLANDS	0167-8442	1872-7638		THEOR APPL FRACT MEC	Theor. Appl. Fract. Mech.	OCT	2020	109
J	Ouyang, YP; Yang, Q; Chen, XQ; Xu, YF				Ouyang, Yiping; Yang, Qi; Chen, Xinquan; Xu, Yongfu			An Analytical Model for Rock Cutting with a Chisel Pick of the Cutter Suction Dredger	JOURNAL OF MARINE SCIENCE AND ENGINEERING			English	Article						analytical model; cutting force; chisel pick; cutting parameter; fracture mechanism; cutter suction dredger	SPHERICAL CAVITY-EXPANSION; BACK RAKE ANGLE; TRANSITION DEPTH; PDC CUTTERS; INDENTATION; FORCE; PERFORMANCE; MECHANICS; TESTS; PREDICTION	Cutter suction dredgers are important pieces of rock excavation equipment in port and waterway construction. It is valuable but difficult to properly estimate the cutting force on the chisel pick of the cutter suction dredger. In this paper, an analytical model, called the crushed zone expansion induced tensile failure model (CEIT model), is proposed for rock cutting with a chisel pick in order t…	[Ouyang, Yiping; Yang, Qi; Chen, Xinquan] Shanghai Jiao Tong Univ, State Key Lab Ocean Engn, Shanghai 200240, Peoples R China; [Ouyang, Yiping; Yang, Qi; Chen, Xinquan] Shanghai Jiao Tong Univ, Collaborat Innovat Ctr Adv Ship & Deep Sea Explor, Shanghai 200240, Peoples R China; [Ouyang, Yiping; Yang, Qi; Chen, Xinquan; Xu, Yongfu] Shanghai Jiao Tong Univ, Sch Naval Architecture Ocean & Civil Engn…	Ouyang, YP (corresponding author), Shanghai Jiao Tong Univ, State Key Lab Ocean Engn, Shanghai 200240, Peoples R China.; Ouyang, YP (corresponding author), Shanghai Jiao Tong Univ, Collaborat Innovat Ctr Adv Ship & Deep Sea Explor, Shanghai 200240, Peoples R China.; Ouyang, YP (corresponding author), Shanghai Jiao Tong Univ, Sch Naval Architecture Ocean & Civil Engn, Shanghai 200240, Peoples R Ch…	yangqi110@sjtu.edu.cn; ouyouai@139.com; chenxinquan@sjtu.edu.cn; yongfuxu@sjtu.edu.cn			National Natural Science Foundation of ChinaNational Natural Science Foundation of China (NSFC) [51179104]; Key Project of National Nature Science Foundation of ChinaNational Natural Science Foundation of China (NSFC) [41630633]	This work was supported by the National Natural Science Foundation of China [grant number 51179104] and the Key Project of National Nature Science Foundation of China [grant number 41630633].	Ab Adzis AH, 2018, AIP CONF PROC, V2035, DOI 10.1063/1.5075585; Akbari B, 2016, J NAT GAS SCI ENG, V35, P347, DOI 10.1016/j.jngse.2016.08.043; Alehossein H, 2000, ROCK MECH ROCK ENG, V33, P267, DOI 10.1007/s006030070003; Allington A.V., 1969, MACHINING ROCK MAT; Bao RH, 2011, ROCK MECH ROCK ENG, V44, P339, DOI 10.1007/s00603-010-0133-2; Bilgin N, 2006, INT J ROCK MECH MIN, V43, P139, DOI 10.1016/…	64	0	0	2	2	MDPI	BASEL	ST ALBAN-ANLAGE 66, CH-4052 BASEL, SWITZERLAND		2077-1312		J MAR SCI ENG	J. Mar. Sci. Eng.	OCT	2020	8	10
J	Gao, XH; Cheng, BC; Tian, WP; Zhang, ZP; Li, JC; Qi, HL				Gao, Xuhe; Cheng, Baocheng; Tian, Weiping; Zhang, Zhipei; Li, Jiachun; Qi, Hongliang			Simulation Parameter Selection and Steady Seepage Analysis of Binary Structure Slope	WATER			English	Article						slope support; superposition calculation; numerical simulation; steady-state seepage; binary structure; pore water pressure	STABILITY	The selection of calculation parameters for slope excavation support design and the analysis of seepage stability is a significant challenge. This difficulty also hinders the development of slope support engineering. This study examined the right binary structure slope engineering of the K5 + 220-K5 + 770 section of the TJ1A mark of the Jiangkou-Weng'an Highway in Guizhou province. In this study,…	[Gao, Xuhe; Tian, Weiping; Li, Jiachun; Qi, Hongliang] Changan Univ, Minist Educ, Key Lab Highway Engn Special Reg, Xian 710064, Peoples R China; [Cheng, Baocheng] Henan Nonferrous Met Geol Explorat Inst, Zhengzhou 450052, Peoples R China; [Zhang, Zhipei] Xian Univ Sci & Technol, Coll Geol & Environm, Xian 710054, Peoples R China	Gao, XH (corresponding author), Changan Univ, Minist Educ, Key Lab Highway Engn Special Reg, Xian 710064, Peoples R China.; Cheng, BC (corresponding author), Henan Nonferrous Met Geol Explorat Inst, Zhengzhou 450052, Peoples R China.	2017021008@chd.edu.cn; yousebaocheng@126.com; fz02@gl.chd.edu.cn; zhipeizhangt@126.com; zhs@chd.edu.cn; qihongl@chd.edu.cn		Gao, Xuhe/0000-0001-6942-3368	Western Transportation Construction Science and Technology Project [2006-318-000-07]; CCCC (China Communications Construction Co., Ltd.) Technology Research and Development Project [2011-ZJKJ-01]; National Natural Science Foundation of ChinaNational Natural Science Foundation of China (NSFC) [51708043]; Fundamental Research Funds for the Central Universities, CHD [300102219106, 300102219209]	This work was funded by the Western Transportation Construction Science and Technology Project [2006-318-000-07], the CCCC (China Communications Construction Co., Ltd.) Technology Research and Development Project (2011-ZJKJ-01), the National Natural Science Foundation of China [51708043], the Fundamental Research Funds for the Central Universities, CHD [300102219106] and the Fundamental Research …	Editorial Board of Engineering Geology, 2007, HDB ENG GEOL, V4th; [高小育 Gao Xiaoyu], 2004, [岩土力学, Rock and Soil Mechanics], V25, P69; LAM L, 1987, CAN GEOTECH J, V24, P565, DOI 10.1139/t87-071; Liu J., 1992, SOIL SEEPAGE STABILI; Liu WP, 2017, WATER-SUI, V9, DOI 10.3390/w9100758; Liu Y., 2008, HYDRAULICS; Mao C., 1982, J GEOTECH ENG, V4, P87; MAO Chang-xi, 2001, CHINESE J GEOTECHNIC, V23, P746; Mo…	20	0	0	0	0	MDPI	BASEL	ST ALBAN-ANLAGE 66, CH-4052 BASEL, SWITZERLAND		2073-4441		WATER-SUI	Water	OCT	2020	12	10
J	Jin, ZR; Talukdar, M; Sone, H				Jin, Zirou; Talukdar, Mayukh; Sone, Hiroki			Apparent moduli and strength differences between cylindrical and prism specimens caused by edge confinement effects	INTERNATIONAL JOURNAL OF ROCK MECHANICS AND MINING SCIENCES			English	Article						Shape effects; Numerical modeling; UCS; Young's modulus; Triaxial compression		Rock samples obtained from excavation and fault damage zones are friable, and it is challenging to obtain cylindrical specimens from such rocks using coring bits in the lab. On the other hand, preparation of prismatic specimens may be less destructive because it does not exert excessive rotational torque around the sides of the rock as in the preparation of cylindrical specimens. Therefore, prism…	[Jin, Zirou; Talukdar, Mayukh; Sone, Hiroki] Univ Wisconsin, Madison, WI 53706 USA	Jin, ZR (corresponding author), Univ Wisconsin, Madison, WI 53706 USA.	zjin62@wisc.edu	Talukdar, Mayukh/AAL-8581-2021		National Science FoundationNational Science Foundation (NSF) [1727661, OCE 1450528]	We would like to thank the reviewers for their constructive suggestions which improved the manuscript. This work was partially supported by the National Science Foundation grants 1727661 and OCE 1450528.	Jaeger JC, 2007, FUNDAMENTALS ROCK ME; KOVARI K, 1983, INT J ROCK MECH MIN, V20, P283; Lee H., 2005, THESIS; LOCKNER DA, 1991, NATURE, V350, P39, DOI 10.1038/350039a0; Ma XD, 2016, J GEOPHYS RES-SOL EA, V121, P6477, DOI 10.1002/2016JB012979; Paterson MS, 2005, EXPT ROCK DEFORMATIO; Peng J, 2018, ENG GEOL, V246, P245, DOI 10.1016/j.enggeo.2018.10.003; Tuncay E, 2009, B ENG GEOL ENVIRON, V68, P491,…	10	0	0	1	2	PERGAMON-ELSEVIER SCIENCE LTD	OXFORD	THE BOULEVARD, LANGFORD LANE, KIDLINGTON, OXFORD OX5 1GB, ENGLAND	1365-1609	1873-4545		INT J ROCK MECH MIN	Int. J. Rock Mech. Min. Sci.	OCT	2020	134
J	Lisjak, A; Young-Schultz, T; Li, B; He, L; Tatone, BSA; Mahabadi, OK				Lisjak, A.; Young-Schultz, T.; Li, B.; He, L.; Tatone, B. S. A.; Mahabadi, O. K.			A novel rockbolt formulation for a GPU-accelerated, finite-discrete element method code and its application to underground excavations	INTERNATIONAL JOURNAL OF ROCK MECHANICS AND MINING SCIENCES			English	Article						Rockbolts; Rock reinforcement; Finite-discrete element method (FDEM); Rock fracturing; GPU computing; Numerical modelling	FULLY GROUTED ROCKBOLTS; FINITE/DISCRETE ELEMENT; MECHANICAL-BEHAVIOR; ANALYTICAL-MODEL; OPALINUS CLAY; REINFORCEMENT; BOLTS; SIMULATION; TUNNELS; MASSES	Rockbolting is widely used in civil and mining engineering to increase the inherent strength of the rock mass and reduce deformations around underground excavations. Rockbolt design by means of computer-aided numerical simulations has been playing an increasingly important role in geotechnical engineering. The research work presented herein introduces a novel rockbolt logic for the finite-discret…	[Lisjak, A.; Young-Schultz, T.; Li, B.; He, L.; Tatone, B. S. A.; Mahabadi, O. K.] Geomechanica Inc, Suite 900,390 Bay St, Toronto, ON M5H 2Y2, Canada	Lisjak, A (corresponding author), Geomechanica Inc, Suite 900,390 Bay St, Toronto, ON M5H 2Y2, Canada.	andrea.lisjak@geomechanica.com					Aziz N, 2016, ROCK MECH ROCK ENG, V49, P3189, DOI 10.1007/s00603-016-0973-5; Bahrani N, 2017, J ROCK MECH GEOTECH, V9, P267, DOI 10.1016/j.jrmge.2016.07.006; Barton N., 1974, ROCK MECH, V6, P189, DOI [DOI 10.1007/BF01239496, 10.1007/bf01239496]; BENMOKRANE B, 1995, INT J ROCK MECH MIN, V32, P633, DOI 10.1016/0148-9062(95)00021-8; Bieniawski Z, 1973, CIV ENG S AFR, DOI 10.1016/0148-9062(74)90924-3…	68	1	1	7	11	PERGAMON-ELSEVIER SCIENCE LTD	OXFORD	THE BOULEVARD, LANGFORD LANE, KIDLINGTON, OXFORD OX5 1GB, ENGLAND	1365-1609	1873-4545		INT J ROCK MECH MIN	Int. J. Rock Mech. Min. Sci.	OCT	2020	134
J	Zeng, GS; Wang, HN; Jiang, MJ; Luo, LS				Zeng, G. S.; Wang, H. N.; Jiang, M. J.; Luo, L. S.			Analytical solution of displacement and stress induced by the sequential excavation of noncircular tunnels in viscoelastic rock	INTERNATIONAL JOURNAL OF ROCK MECHANICS AND MINING SCIENCES			English	Article						Sequential excavations; Noncircular tunnels; Viscoelastic rock; Analytical solutions	LINED CIRCULAR TUNNELS; CROSS-SECTION; ELASTIC SOLUTION; PIPE-ROOF; DESIGN; FAILURE; FIELD	The sequential excavation of a tunnel cross-section is usually employed in large scale tunnel construction to reduce the excavation impact on surrounding rock. Time-dependent sequential excavation combined with rock rheology makes the mechanical response of the surrounding rock a complex function of time, and it is possibly closely related to the excavation path. This study presents new analytica…	[Zeng, G. S.] Shanghai Inst Technol, Sch Urban Construct & Safety Engn, Shanghai 201418, Peoples R China; [Wang, H. N.; Luo, L. S.] Tongji Univ, Sch Aerosp Engn & Appl Mech, Shanghai 200092, Peoples R China; [Wang, H. N.; Jiang, M. J.] Tongji Univ, State Key Lab Disaster Reduct Civil Engn, Shanghai 200092, Peoples R China; [Jiang, M. J.] Tianjin Univ, Dept Civil Engn, Tianjin 300072, Peoples R Ch…	Wang, HN (corresponding author), Tongji Univ, Sch Aerosp Engn & Appl Mech, Shanghai 200092, Peoples R China.	wanghn@tongji.edu.cn			National Natural Science Foundation of ChinaNational Natural Science Foundation of China (NSFC) [11872281, 51639008, 11572228]; State Key Laboratory for Disaster Reduction in Civil Engineering [SLDRCE19-A-06]	This study was financially supported by the National Natural Science Foundation of China (Grant Nos. 11872281 & 51639008, 11572228) and the State Key Laboratory for Disaster Reduction in Civil Engineering (SLDRCE19-A-06). Their support is greatly appreciated.	Cao CY, 2018, TUNN UNDERGR SP TECH, V77, P188, DOI 10.1016/j.tust.2018.04.007; Carranza-Torres C, 1999, INT J ROCK MECH MIN, V36, P777, DOI 10.1016/S0148-9062(99)00047-9; Dai HL, 2004, INT J PRES VES PIP, V81, P739, DOI 10.1016/j.ijpvp.2004.05.004; Duenser C, 2012, COMPUT GEOTECH, V44, P157, DOI 10.1016/j.compgeo.2012.04.003; Exadaktylos G. E., 2001, INT J ROCK MECH MIN, V39, P905; Exadaktylos GE…	40	0	0	15	18	PERGAMON-ELSEVIER SCIENCE LTD	OXFORD	THE BOULEVARD, LANGFORD LANE, KIDLINGTON, OXFORD OX5 1GB, ENGLAND	1365-1609	1873-4545		INT J ROCK MECH MIN	Int. J. Rock Mech. Min. Sci.	OCT	2020	134
J	Procesi, M; Cinti, D; Casentini, B; Cabassi, J; Amalfitano, S; Pizzino, L; Capecchiacci, F; Butturini, A; Fazi, S				Procesi, Monia; Cinti, Daniele; Casentini, Barbara; Cabassi, Jacopo; Amalfitano, Stefano; Pizzino, Luca; Capecchiacci, Francesco; Butturini, Andrea; Fazi, Stefano			Geochemical characterization of an urban lake in the centre of Rome (Lake Bullicante, Italy)	ITALIAN JOURNAL OF GEOSCIENCES			English	Article						Lake Bullicante; fluid geochemistry; microbiology; Rome; Alban Hill Volcanic District	CARBON-ISOTOPE FRACTIONATION; DISSOLVED ORGANIC-CARBON; ALBAN HILLS VOLCANO; STRONTIUM; ABSORPTION; RATIOS; WATERS; REGION; ROCKS	Urban lakes have become increasingly important in the planning of urban ecology, green infrastructure and green areas in European cities. This paper describes the chemical, isotope and microbial features of Lake Bullicante, a small artificial lake located within the urban area of the city of Rome. It has an anthropogenic origin due to excavation works that intercepted the underlying aquifer, givi…	[Procesi, Monia; Cinti, Daniele; Pizzino, Luca] Ist Nazl Geofis & Vulcanol, Via Vigna Murata 605, I-00143 Rome, Italy; [Casentini, Barbara; Amalfitano, Stefano; Fazi, Stefano] CNR, CNR IRSA, Water Res Inst, Via Salaria Km 29-300 CP10, I-00015 Rome, Italy; [Cabassi, Jacopo] CNR, CNR IRSA, Inst Geosci & Earth Resources, Via La Pira 4, I-50121 Florence, Italy; [Capecchiacci, Francesco] Univ Firenze,…	Procesi, M (corresponding author), Ist Nazl Geofis & Vulcanol, Via Vigna Murata 605, I-00143 Rome, Italy.	monia.procesi@ingv.it	Cinti, Daniele/Q-1114-2017; Amalfitano, Stefano/C-6737-2012; Procesi, Monia/AAA-8002-2019; Cabassi, Jacopo/B-1231-2016	Cinti, Daniele/0000-0002-8995-3312; Amalfitano, Stefano/0000-0002-6148-1472; Procesi, Monia/0000-0003-0029-5235; Cabassi, Jacopo/0000-0001-7778-8498; Butturini, Andrea/0000-0002-7712-6328; CASENTINI, BARBARA/0000-0002-0371-7512	Davines SpA; INGV project "FISR Italia Centrale 2018"	Many thanks are due to the INGV Laboratory of Palermo for the technical support in the dissolved gases, isotopic and trace elements analysis. We thank Alessandra Sciarra for dissolved gas analysis of waters from wells. We wish to express our gratitude also to Maila Severini for the assistance in microbiological analysis, to Emanuela Bagnato and Andrea Gasparini for their help in field measurement…	Amalfitano S, 2018, FRONT MICROBIOL, V9, DOI 10.3389/fmicb.2018.02903; BARBIERI M, 1979, CHEM GEOL, V24, P181, DOI 10.1016/0009-2541(79)90121-9; Battisti C, 2017, ENVIRON DEV, V24, P179, DOI 10.1016/j.envdev.2017.05.003; Boari E, 2009, B VOLCANOL, V71, P977, DOI 10.1007/s00445-009-0278-6; Brinkmann T, 2003, AQUAT SCI, V65, P415, DOI 10.1007/s00027-003-0670-9; CABASSI J., J VOLCANOL GEOTHER R, V37…	57	0	0	4	4	SOC GEOLOGICA ITALIANA	ROME	UNIV DEGLI STUDI LA SAPIENZA, DIPART SCI DELLA TERRA, PIAZZALE ALDO MORO 5, ROME, I-00185, ITALY	2038-1719	2038-1727		ITAL J GEOSCI	Ital. J. Geosci.	OCT	2020	139	3
J	Morovatdar, A; Palassi, M; Ashtiani, RS				Morovatdar, Ali; Palassi, Massoud; Ashtiani, Reza S.			Effect of pipe characteristics in umbrella arch method on controlling tunneling-induced settlements in soft grounds	JOURNAL OF ROCK MECHANICS AND GEOTECHNICAL ENGINEERING			English	Article						Tunnel reinforcement; Umbrella arch method (UAM); Urban tunneling; Forepoling pipes; Finite element analysis; Numerical simulation	MODEL; EXCAVATIONS; DESIGN; SYSTEM	Recent developments in tunneling have stimulated design practitioners to more effectively utilize the underground spaces. However, tunneling at shallow depth in soft grounds gives rise to concerns associated with tunnel instability. Umbrella arch method (UAM), as a pre-reinforcement approach of tunnels in complex geological conditions, is widely used to maintain the tunnel stability. Quantitative…	[Morovatdar, Ali; Ashtiani, Reza S.] Univ Texas El Paso, Dept Civil Engn, El Paso, TX 79968 USA; [Palassi, Massoud] Univ Tehran, Coll Engn, Fac Civil Engn, Tehran 141556619, Iran	Morovatdar, A (corresponding author), Univ Texas El Paso, Dept Civil Engn, El Paso, TX 79968 USA.	amorovatdar@miners.utep.edu					Abdollahi MS, 2019, TUNN UNDERGR SP TECH, V88, P186, DOI 10.1016/j.tust.2019.03.008; Aksoy CO, 2010, TUNN UNDERGR SP TECH, V25, P553, DOI 10.1016/j.tust.2010.03.004; ALIMOHAMMADI H, 2019, INT J ENG APPL SCI, V7, DOI DOI 10.31873/IJEAS.6.10.10; Ashtiani R. S., 2019, FHWATX19069651; Barla M, 2013, ELECT J GEOTECH ENG, V18, P2997; Beizaei M, 2020, P INT C CAS HIST GEO; Beyzaei M, 2019, KSCE J CIV EN…	43	2	2	3	4	SCIENCE PRESS	BEIJING	16 DONGHUANGCHENGGEN NORTH ST, BEIJING 100717, PEOPLES R CHINA	1674-7755	2589-0417		J ROCK MECH GEOTECH	J. Rock Mech. Geotech. Eng.	OCT	2020	12	5
J	Parwata, INS; Nakashima, S; Shimizu, N; Osawa, T				Parwata, I. Nyoman Sudi; Nakashima, Shinichiro; Shimizu, Norikazu; Osawa, Takahiro			Effect of digital elevation models on monitoring slope displacements in open-pit mine by differential interferometry synthetic aperture radar	JOURNAL OF ROCK MECHANICS AND GEOTECHNICAL ENGINEERING			English	Article						Open-pit mine; Slope monitoring; Digital elevation model (DEM); Interferometric synthetic aperture radar (InSAR); Differential interferometric synthetic aperture radar (DInSAR)	SAR INTERFEROMETRY; LAND SUBSIDENCE; INSAR; TOPOGRAPHY; EARTHQUAKE; MISSION; GPS	Displacement monitoring in open-pit mines is one of the important tasks for safe management of mining processes. Differential interferometric synthetic aperture radar (DInSAR), mounted on an artificial satellite, has the potential to be a cost-effective method for monitoring surface displacements over extensive areas, such as open-pit mines. DInSAR requires the ground surface elevation data in th…	[Parwata, I. Nyoman Sudi; Nakashima, Shinichiro; Shimizu, Norikazu] Yamaguchi Univ, Grad Sch Sci & Engn, Ube, Yamaguchi 7558611, Japan; [Parwata, I. Nyoman Sudi; Shimizu, Norikazu; Osawa, Takahiro] Yamaguchi Univ, Ctr Res & Applicat Satellite Remote Sensing, Ube, Yamaguchi 7558611, Japan; [Osawa, Takahiro] Japan Aerosp Explorat Agcy JAXA, Satellite Applicat & Operat Ctr SAOC, Reg Satellite Applic…	Parwata, INS (corresponding author), Yamaguchi Univ, Grad Sch Sci & Engn, Ube, Yamaguchi 7558611, Japan.; Parwata, INS (corresponding author), Yamaguchi Univ, Ctr Res & Applicat Satellite Remote Sensing, Ube, Yamaguchi 7558611, Japan.	sudi_jbc@yahoo.com			JSPS KAKENHIMinistry of Education, Culture, Sports, Science and Technology, Japan (MEXT)Japan Society for the Promotion of ScienceGrants-in-Aid for Scientific Research (KAKENHI) [16H03153]; Limestone Association of Japan	The authors express their gratitude to the Japan Aerospace Exploration Agency (JAXA) for providing the ALOS-PALSAR data. The authors also wish to express their sincere appreciation to Hachinohe Mining Co., Ltd. for their cooperation with the displacement monitoring by GPS. They also thank Emeritus Prof. T. Tanaka of Yamaguchi University and Prof. M. Shimada of Tokyo Denki University for their val…	Burgmann R, 2000, ANNU REV EARTH PL SC, V28, P169, DOI 10.1146/annurev.earth.28.1.169; Chaussard E, 2014, REMOTE SENS ENVIRON, V140, P94, DOI 10.1016/j.rse.2013.08.038; Eriksen HO, 2017, REMOTE SENS ENVIRON, V191, P297, DOI 10.1016/j.rse.2016.12.024; Ferretti A, 2014, SATELLITE INSAR DATA: RESERVOIR MONITORING FROM SPACE, P1, DOI 10.3997/9789073834712; Ferretti A., 2007, INSAR PRINCIPLES GUI; Gab…	44	0	0	2	2	SCIENCE PRESS	BEIJING	16 DONGHUANGCHENGGEN NORTH ST, BEIJING 100717, PEOPLES R CHINA	1674-7755	2589-0417		J ROCK MECH GEOTECH	J. Rock Mech. Geotech. Eng.	OCT	2020	12	5
J	Yasar, S				Yasar, Serdar			Predictive plots for conical pick performance using mechanical and elastoplastic properties of rocks	JOURNAL OF ROCK MECHANICS AND GEOTECHNICAL ENGINEERING			English	Article						Performance prediction; Rock cutting tests; Specific energy; Cutting force; Plasticity index	NUMERICAL-SIMULATION; CUTTING FORCE; ENERGY; TESTS; FRAGMENTATION; FRACTURE; STRESS; FINITE	Conical picks are by far the most widely used drag type cutting tools employed on partial face rock excavation machines. The cutting force and specific energy are two important design parameters for the conical pick performance, and the rock cutting testing is considered as the promising tool for determining these parameters. In the absence of an instrumented cutting rig, researchers generally re…	[Yasar, Serdar] Karadeniz Tech Univ, Dept Min Engn, TR-61080 Trabzon, Turkey	Yasar, S (corresponding author), Karadeniz Tech Univ, Dept Min Engn, TR-61080 Trabzon, Turkey.	seyasar@ktu.edu.tr	Yasar, Serdar/AAA-1448-2020	Yasar, Serdar/0000-0003-4973-7970			Balci C, 2004, J S AFR I MIN METALL, V104, P633; Bao RH, 2011, ROCK MECH ROCK ENG, V44, P339, DOI 10.1007/s00603-010-0133-2; Bilgin N, 2006, INT J ROCK MECH MIN, V43, P139, DOI 10.1016/j.ijrmms.2005.04.009; Copur H, 2003, J S AFR I MIN METALL, V103, P589; Demou SG, 1983, 8748 US BUR MIN; EVANS I, 1984, INT J MINING ENG, V2, P63, DOI 10.1007/BF00880858; FOWELL RJ, 1994, TUNNELLING '94, P787; Fowel…	41	0	0	2	3	SCIENCE PRESS	BEIJING	16 DONGHUANGCHENGGEN NORTH ST, BEIJING 100717, PEOPLES R CHINA	1674-7755	2589-0417		J ROCK MECH GEOTECH	J. Rock Mech. Geotech. Eng.	OCT	2020	12	5
J	Zhang, CQ; Cui, GJ; Zhang, Y; Zhou, H; Liu, N; Huang, SL				Zhang, Chuanqing; Cui, Guojian; Zhang, Yang; Zhou, Hui; Liu, Ning; Huang, Shuling			Squeezing deformation control during bench excavation for the Jinping deep soft-rock tunnel	ENGINEERING FAILURE ANALYSIS			English	Article						Deep tunnel; Soft rocks; Squeezing deformation; Parameter inversion; Support and reinforcement; Optimisation design		Jinping II hydropower station in Sichuan Province, China, is one of the largest tunnel groups in the world. The tunnel was excavated using bench excavation with a top heading and a bench. Severe squeezing problems were reported immediately after the excavation of the top heading when crossing the chlorite schist stratum at Ch.1+537 m. Squeezing deformation could last for a long period during tunn…	[Zhang, Chuanqing; Cui, Guojian; Zhou, Hui] Chinese Acad Sci, Inst Rock & Soil Mech, State Key Lab Geomecha & Geotech Engn, Wuhan, Hubei, Peoples R China; [Zhang, Chuanqing; Cui, Guojian; Zhou, Hui] Univ Chinese Acad Sci, Beijing, Peoples R China; [Zhang, Yang; Liu, Ning] PowerChina Huadong Engn Corp Ltd, Hangzhou, Zhejiang, Peoples R China; [Huang, Shuling] Changjiang River Sci Res Inst, Minist …	Cui, GJ (corresponding author), Chinese Acad Sci, Inst Rock & Soil Mech, State Key Lab Geomecha & Geotech Engn, Wuhan, Hubei, Peoples R China.	cgj921211@gmail.com			Key projects of the Yalong River Joint Fund of the National Natural Science Foundation of ChinaNational Natural Science Foundation of China (NSFC) [U1865203]; National Key Research and Development Program of China [2018YFC0809601]; Youth Innovation Promotion Association CAS; Yalong River Hydropower Development Company LTD	The authors gratefully acknowledge the financial support from the Key projects of the Yalong River Joint Fund of the National Natural Science Foundation of China (Grant No. U1865203), the National Key Research and Development Program of China(Grant No. 2019YFC0605103), the National Key Research and Development Program of China (Grant No. 2018YFC0809601), and Youth Innovation Promotion Association…	Barla G., 2008, 12 INT C INT ASS COM, V6, P4265; Barla G, 2016, J ROCK MECH GEOTECH, V8, P294, DOI 10.1016/j.jrmge.2015.12.003; Fekete S, 2010, TUNN UNDERGR SP TECH, V25, P614, DOI 10.1016/j.tust.2010.04.008; Gikas V, 2012, SENSORS-BASEL, V12, P11249, DOI 10.3390/s120811249; Goel RK, 2014, INT J MIN SCI TECHNO, V24, P783, DOI 10.1016/j.ijmst.2014.10.008; He MC, 2014, J ROCK MECH GEOTECH, V6, P165…	24	0	0	12	18	PERGAMON-ELSEVIER SCIENCE LTD	OXFORD	THE BOULEVARD, LANGFORD LANE, KIDLINGTON, OXFORD OX5 1GB, ENGLAND	1350-6307	1873-1961		ENG FAIL ANAL	Eng. Fail. Anal.	OCT	2020	116
J	Shahmoradi, J; Rad, HS; Roghanchi, P				Shahmoradi, Javad; Salari Rad, Hosein; Roghanchi, Pedram			Face Stability Analysis for the Earth Pressure Balance Method in Nonhomogeneous Inclined Soil Layers: Case Study	INTERNATIONAL JOURNAL OF GEOMECHANICS			English	Article						Face stability; Earth pressure balance; Limit equilibrium; Nonhomogeneous ground; Inclined soil layers; Numerical simulation	SHALLOW CIRCULAR TUNNELS; SEEPAGE; FAILURE; DRIVEN; MODEL	Earth pressure balance tunnel boring machines (EPB TBMs) were successfully used for tunnel excavation in loose grounds. Determining the minimal support pressure in the tunnel face is one of the most critical steps in tunneling by the earth pressure balance method. This study aimed to investigate the tunnel face stability of the Dez-Ghomrood water transfer tunnel analytically and numerically. Duri…	[Shahmoradi, Javad; Roghanchi, Pedram] New Mexico Inst Min & Technol, Dept Mineral Engn, Socorro, NM 87801 USA; [Salari Rad, Hosein] Amirkabir Univ Technol, Dept Min Engn, Tehran 1591634311, Iran	Roghanchi, P (corresponding author), New Mexico Inst Min & Technol, Dept Mineral Engn, Socorro, NM 87801 USA.	pedram.roghanchi@nmt.edu	Rad, Hossein Salari/ABA-5106-2020				Abu-Farsakh MY, 1999, INT J NUMER ANAL MET, V23, P23, DOI 10.1002/(SICI)1096-9853(199901)23:1<23::AID-NAG956>3.0.CO;2-Z; Anagnostou G, 1996, TUNN UNDERGR SP TECH, V11, P165, DOI 10.1016/0886-7798(96)00017-X; Anagnostou G., 1994, TUNNELLING UNDERGROU; Berthoz N, 2012, TUNN UNDERGR SP TECH, V30, P25, DOI 10.1016/j.tust.2012.01.005; Broere W., 2001, TUNN FAC STAB NEW CP; CHAMBON P, 1994, J GEOTECH E…	33	1	1	21	27	ASCE-AMER SOC CIVIL ENGINEERS	RESTON	1801 ALEXANDER BELL DR, RESTON, VA 20191-4400 USA	1532-3641	1943-5622		INT J GEOMECH	Int. J. Geomech.	OCT 1	2020	20	10
J	Zareifard, MR				Zareifard, Mohammad Reza			Ground Reaction Curve for Deep Circular Tunnels in Strain-Softening Mohr-Coulomb Rock Masses Considering the Damaged Zone	INTERNATIONAL JOURNAL OF GEOMECHANICS			English	Article						Ground reaction curve; Circular tunnel; Mohr-Coulomb criterion; Strain-softening model; Blast-induced damaged zone	RESPONSE CURVES; EXCAVATION; OPENINGS; PARAMETERS; PROJECT	The drill and blast method is one of the most widely used techniques for excavation of tunnels in rock masses. The most worrying issue in this method is unfavorable damage induced by blast impact into the surrounding rock mass. The blast-induced damaged zone has a possible influence on the tunnel stability. Therefore, the damage in the rock mass should be minimized as much as possible, or if it i…	[Zareifard, Mohammad Reza] Estahban Higher Educ Ctr, Dept Civil Engn, Estahban 4465574519, Iran	Zareifard, MR (corresponding author), Estahban Higher Educ Ctr, Dept Civil Engn, Estahban 4465574519, Iran.	zareefard@aut.ac.ir		Zareifard, Mohammad Reza/0000-0002-7868-5498			Alonso E, 2003, INT J NUMER ANAL MET, V27, P1153, DOI 10.1002/nag.315; Backblom G, 1999, TUNN UNDERGR SP TECH, V14, P377, DOI 10.1016/S0886-7798(99)00053-X; Bieniawski ZT., 1976, P97; BROWN ET, 1983, J GEOTECH ENG-ASCE, V109, P15, DOI 10.1061/(ASCE)0733-9410(1983)109:1(15); Cai M, 2007, INT J ROCK MECH MIN, V44, P247, DOI 10.1016/j.ijrmms.2006.07.005; CARLSON SR, 1993, INT J ROCK MECH MIN, V30, P…	66	1	1	13	16	ASCE-AMER SOC CIVIL ENGINEERS	RESTON	1801 ALEXANDER BELL DR, RESTON, VA 20191-4400 USA	1532-3641	1943-5622		INT J GEOMECH	Int. J. Geomech.	OCT 1	2020	20	10
J	Mohamad, ET; Li, DY; Murlidhar, BR; Armaghani, DJ; Kassim, KA; Komoo, I				Mohamad, Edy Tonnizam; Li, Diyuan; Murlidhar, Bhatawdekar Ramesh; Jahed Armaghani, Danial; Kassim, Khairul Anuar; Komoo, Ibrahim			The effects of ABC, ICA, and PSO optimization techniques on prediction of ripping production	ENGINEERING WITH COMPUTERS			English	Article						Surface excavation; Ripping production; Neuro-bee; Neuro-imperialism; Neuro-swarm	ARTIFICIAL NEURAL-NETWORK; PARTICLE SWARM OPTIMIZATION; IMPERIALIST COMPETITIVE ALGORITHM; GROUND VIBRATION PREDICTION; SHEAR-STRENGTH; ROCK FRAGMENTATION; INDEX; EXCAVATABILITY; CAPACITY; MACHINE	As blasting has some environmental constraints, ripping has got more prevalent as a method of breaking ground in both civil and mining engineering applications. A rippability model of a higher applicability is, therefore, needed to appropriately predict the ripping production (Q) prior to carrying out such tests. For the purpose of predicting the results of ripping production that were attained i…	[Mohamad, Edy Tonnizam; Murlidhar, Bhatawdekar Ramesh; Kassim, Khairul Anuar] Univ Teknol Malaysia, Ctr Trop Geoengn GEOTROPIK, Sch Civil Engn, Fac Engn, Skudai 81310, Johor, Malaysia; [Li, Diyuan] Cent South Univ, Sch Resources & Safety Engn, Changsha 410083, Peoples R China; [Jahed Armaghani, Danial] Duy Tan Univ, Inst Res & Dev, Da Nang 550000, Vietnam; [Komoo, Ibrahim] Univ Kebangsaan Malaysi…	Li, DY (corresponding author), Cent South Univ, Sch Resources & Safety Engn, Changsha 410083, Peoples R China.; Armaghani, DJ (corresponding author), Duy Tan Univ, Inst Res & Dev, Da Nang 550000, Vietnam.	edy@utm.my; diyuan.li@csu.edu.cn; rmbhatawdekar2@live.utm.my; danialjahedarmaghani@duytan.edu.vn; kanuar@utm.my; komoo@pkrisc.cc.ukm.my	Li, Diyuan/V-2199-2017	Li, Diyuan/0000-0002-4181-5463			Abad SVANK, 2018, NEURAL COMPUT APPL, V29, P423, DOI 10.1007/s00521-016-2456-8; Ahmadi MA, 2013, APPL SOFT COMPUT, V13, P1085, DOI 10.1016/j.asoc.2012.10.009; Armaghani DJ, 2014, ARAB J GEOSCI, V7, P5383, DOI 10.1007/s12517-013-1174-0; Armaghani DJ, 2017, TUNN UNDERGR SP TECH, V63, P29, DOI 10.1016/j.tust.2016.12.009; Armaghani DJ, 2016, ARAB J GEOSCI, V9, DOI 10.1007/s12517-015-2057-3; Armaghani…	83	8	8	5	9	SPRINGER	NEW YORK	ONE NEW YORK PLAZA, SUITE 4600, NEW YORK, NY, UNITED STATES	0177-0667	1435-5663		ENG COMPUT-GERMANY	Eng. Comput.	OCT	2020	36	4
J	Lu, W; Sun, HB				Lu, Wei; Sun, Huibin			Study on support characteristic curve of concrete-filled steel tubular arch in underground support	STRUCTURES			English	Article						Concrete filled steel tubular arch; Support characteristic curve; Underground excavation; Convergence-confinement method	FAILURE-MECHANISM; COAL-MINE; CONFINEMENT; JOINTS; SETS	Concrete filled steel tubular (CFST) arch has broad application prospects as a high-strength support form in underground excavations, especially in weak and broken surrounding rock. However, the structural design of CFST arch in underground excavation still relies on experience-based method and lack of quantitative mechanical analysis. This paper presents a detailed analysis on the mechanical beh…	[Lu, Wei; Sun, Huibin] Shandong Univ, Res Ctr Geotech & Struct Engn, Jinan 250061, Peoples R China; [Lu, Wei; Sun, Huibin] Shandong Jianzhu Univ, Sch Transportat Engn, Jinan 250101, Peoples R China	Sun, HB (corresponding author), Shandong Jianzhu Univ, Sch Transportat Engn, Jinan 250101, Peoples R China.	sunhb0206@163.com	Lu, Wei/AAJ-3100-2021				Alejano LR, 2010, INT J ROCK MECH MIN, V47, P150, DOI 10.1016/j.ijrmms.2009.07.008; Brady BHG., 2004, ROCK MECH UNDERGROUN; Carranza-Torres C, 2017, TUNN UNDERGR SP TECH, V69, P233, DOI 10.1016/j.tust.2017.04.003; CEN, 2002, EUROCODE3 DES STEEL; da Silva LS, 2001, COMPUT STRUCT, V79, P873; Dias D, 2011, TUNN UNDERGR SP TECH, V26, P517, DOI 10.1016/j.tust.2011.03.004; Fahimifar A, 2009, TUNN UNDER…	25	2	2	13	18	ELSEVIER SCIENCE INC	NEW YORK	STE 800, 230 PARK AVE, NEW YORK, NY 10169 USA	2352-0124			STRUCTURES	Structures	OCT	2020	27
J	Luo, YB; Chen, JX; Shi, Z; Li, JZ; Liu, WW				Luo, Yanbin; Chen, Jianxun; Shi, Zhou; Li, Juzhu; Liu, Weiwei			Mechanical characteristics of primary support of large span loess highway tunnel: A case study in Shaanxi Province, Loess Plateau, NW China primary	TUNNELLING AND UNDERGROUND SPACE TECHNOLOGY			English	Article						Large span; Tunnel; Rock mass deformation; Primary support; Stress characteristics	EXISTING HIGHWAY; DEFORMATION; EXCAVATION; SHALLOW; ROCK	When a large span loess tunnel is excavated, the rock mass is disturbed, and it is difficult to form a load-bearing arch under shallow depth region. As a result, the structural deformation is complicated. This paper analyzed the deformation of 18 sections in Grade V rock mass and the primary support structural force of 2 sections in a case study of a highway loess tunnel in the large span loess h…	[Luo, Yanbin; Chen, Jianxun; Shi, Zhou; Liu, Weiwei] Changan Univ, Sch Highway, Xian 710064, Peoples R China; [Li, Juzhu] Jiangsu Transportat Inst, Nanjing 210000, Peoples R China	Chen, JX; Liu, WW (corresponding author), Changan Univ, Sch Highway, Xian 710064, Peoples R China.	chenjx1969@163.com; liuwwchd@163.com			National Key R&D Program of China [2018YFB1600100]; National Natural Science Fund Project of ChinaNational Natural Science Foundation of China (NSFC) [51978065, 51678063]; China Postdoctoral Science FoundationChina Postdoctoral Science Foundation [2016M602738]; Chang Jiang Scholars ProgramProgram for Changjiang Scholars & Innovative Research Team in University (PCSIRT) [Q2018209]	The authors would like to acknowledge the financial support provided by the National Key R&D Program of China (Grant No. 2018YFB1600100), the National Natural Science Fund Project of China (Grant Nos. 51978065; Nos. 51678063), the China Postdoctoral Science Foundation (Grant No. 2016M602738) and the Chang Jiang Scholars Program (Grant No. Q2018209).	Bizjak KF, 2004, ENG GEOL, V75, P89, DOI 10.1016/j.enggeo.2004.05.003; Cao CY, 2018, KSCE J CIV ENG, V22, P3170, DOI 10.1007/s12205-017-1586-6; Chen JX, 2020, KSCE J CIV ENG, V24, P1357, DOI 10.1007/s12205-020-1324-3; [陈建勋 CHEN Jianxun], 2007, [中国公路学报, China Journal of Highway and Transport], V20, P71; Derbyshire E, 2001, EARTH-SCI REV, V54, P231, DOI 10.1016/S0012-8252(01)00050-2; Galli G, 2004,…	33	1	1	21	40	PERGAMON-ELSEVIER SCIENCE LTD	OXFORD	THE BOULEVARD, LANGFORD LANE, KIDLINGTON, OXFORD OX5 1GB, ENGLAND	0886-7798			TUNN UNDERGR SP TECH	Tunn. Undergr. Space Technol.	OCT	2020	104
J	Ma, K; Zhang, JH; Zhou, Z; Xu, NW				Ma, Ke; Zhang, Jianhai; Zhou, Zhong; Xu, Nuwen			Comprehensive analysis of the surrounding rock mass stability in the underground caverns of Jinping I hydropower station in Southwest China	TUNNELLING AND UNDERGROUND SPACE TECHNOLOGY			English	Article						Energy dissipation theory; Numerical simulation; Failure mechanism; Underground cavern; Jinping I hydropower station	EXCAVATION-INDUCED DAMAGE; FINITE-ELEMENT-ANALYSIS; LARGE-SCALE; MODEL TESTS; FAILURE; POWERHOUSE; BEHAVIOR; STRESS; ZONE	The geological conditions of the underground caverns in the Jinping I hydropower station are particularly complicated, with high ground stress (the extreme value of the measuring point is 35.7 MPa), complicated deformation and failure mechanisms, and large unloading depth. The large deformation of the surrounding rock mass was beyond current engineering and academic understanding. During the cons…	[Ma, Ke] Dalian Univ Technol, State Key Lab Coastal & Offshore Engn, Dalian 116024, Liaoning, Peoples R China; [Zhang, Jianhai; Xu, Nuwen] Sichuan Univ, State Key Lab Hydraul & Mt River Engn, Chengdu 610065, Sichuan, Peoples R China; [Zhou, Zhong] PowerChina Chengdu Engn Corp Ltd, Chengdu 610072, Sichuan, Peoples R China	Zhang, JH; Xu, NW (corresponding author), Sichuan Univ, State Key Lab Hydraul & Mt River Engn, Chengdu 610065, Sichuan, Peoples R China.	zhangjianhai@scu.edu.cn; xunuwen@scu.edu.cn		Xu, Nuwen/0000-0002-5415-6532	National Key R&D Program of China [2018YFC1505004, 2017YFC1501100]; National Natural Science Foundation of ChinaNational Natural Science Foundation of China (NSFC) [51679158]	This work was supported by the financial support from the National Key R&D Program of China (Nos. 2018YFC1505004 and 2017YFC1501100), and the National Natural Science Foundation of China (No. 51679158). We appreciate the colleagues at the Jinping I hydropower station for their valuable contributions to the project.	Aksoy CO, 2006, INT J ROCK MECH MIN, V43, P166, DOI 10.1016/j.ijrmms.2005.06.004; Dai F, 2016, INT J ROCK MECH MIN, V86, P269, DOI 10.1016/j.ijrmms.2016.05.001; He J.H., 2019, 2019 INT C COMP SCI, P358; Hudson JA, 2009, ENVIRON GEOL, V57, P1275, DOI 10.1007/s00254-008-1554-z; Li A, 2018, TUNN UNDERGR SP TECH, V77, P45, DOI 10.1016/j.tust.2018.03.023; Li HB, 2017, ROCK MECH ROCK ENG, V50, P1883, D…	28	0	0	13	26	PERGAMON-ELSEVIER SCIENCE LTD	OXFORD	THE BOULEVARD, LANGFORD LANE, KIDLINGTON, OXFORD OX5 1GB, ENGLAND	0886-7798			TUNN UNDERGR SP TECH	Tunn. Undergr. Space Technol.	OCT	2020	104
J	Ashour, A; Philippe, D; Jonathan, P				Ashour, Abouessa; Philippe, Duringer; Jonathan, Pelletier			The power of the physical fabric of mudstone in creating trace fossil like redoximorphic features, case study from the late Eocene, Sirt Basin	JOURNAL OF AFRICAN EARTH SCIENCES			English	Article						Mudstone fabric; Paleosols; Redox features; Trace fossils; Tubular forms; Fe-oxides	BIGHORN BASIN; PALEOCLIMATIC IMPLICATIONS; PALEOSOLS; IRON; CONCRETIONS; CRACKING; CLASSIFICATION; IDENTIFICATION; ENVIRONMENTS; PERMEABILITY	This article presents complex paleo-pedoturbation features, preserved in a massive mudstone stratum belonging to a siliciclastic sequence in the upper Eocene. The outcrop of these turbations presents an intricate network of iron oxide in semi tubular forms. The mudstone to which these structures are restricted is lithologically similar to other mudstone beds, below and above it in the sequence. I…	[Ashour, Abouessa; Philippe, Duringer] Univ Strasbourg UdS, CNRS, Inst Phys Globe Strasbourg IPGS, UMR 7516,Ecole & Observ Sci Terre EOST, Batiment Geol,1 Rue Blessig, F-67084 Strasbourg, France; [Jonathan, Pelletier] Tech Ctr, TOTAL, Ave Larribau, F-64018 Pau, France	Ashour, A (corresponding author), Univ Strasbourg UdS, CNRS, Inst Phys Globe Strasbourg IPGS, UMR 7516,Ecole & Observ Sci Terre EOST, Batiment Geol,1 Rue Blessig, F-67084 Strasbourg, France.	aabouessa@unistra.fr			program PAUSE	Thanks firstly go to program PAUSE for the financial support of a research job for Mr. Abouessa at University of Strasbourg, and for the University of Strasbourg (UDS/EOST) for the adoption of the study Project. Special thanks go to M. Schuster for his very critical and exciting comments. J.-F. Ghienne's contribution was, as well, very constructive. Finally, the corrections provided by the review…	Abouessa A, 2015, J AFR EARTH SCI, V111, P335, DOI 10.1016/j.jafrearsci.2015.08.007; Aharon P, 2006, GEOL SOC AM SPEC PAP, V404, P283, DOI 10.1130/2006.2404(24); ALLISON PA, 1988, PALEOBIOLOGY, V14, P139, DOI 10.1017/S009483730001188X; AMBROSI JP, 1986, CHEM GEOL, V57, P371, DOI 10.1016/0009-2541(86)90059-8; ARSHAD MA, 1980, CAN J SOIL SCI, V60, P685, DOI 10.4141/cjss80-078; Ashour A, 2012, J AFR…	85	0	0	1	1	PERGAMON-ELSEVIER SCIENCE LTD	OXFORD	THE BOULEVARD, LANGFORD LANE, KIDLINGTON, OXFORD OX5 1GB, ENGLAND	1464-343X	1879-1956		J AFR EARTH SCI	J. Afr. Earth Sci.	OCT	2020	170
J	Gao, X; Yan, EC; Yeh, TCJ; Yin, XM; Cai, JS; Hao, YH; Wen, JC				Gao, Xu; Yan, E-Chuan; Yeh, Tian-Chyi Jim; Yin, Xiao-Meng; Cai, Jing-Sen; Hao, Yong-Hong; Wen, Jet-Chau			Back analysis of displacements for estimating spatial distribution of viscoelastic properties around an unlined rock cavern	COMPUTERS AND GEOTECHNICS			English	Article						Unlined rock cavern; Viscoelastic parameters; Displacement back analysis; Heterogeneity; Successive linear estimator	SENSITIVITY-ANALYSIS; MODEL; VARIABILITY; STABILITY; HETEROGENEITY; SIMULATION; PARAMETERS; STRENGTH; MASSES; FLOW	A displacement back analysis algorithm is developed, considering the time-dependent effect of the rock mass. It can map spatially distributed the first elastic modulus (E-1), viscidity coefficient (eta(1)), and the second elastic modulus (E-2) of the Kelvin-Voigt viscoelastic constitutive model (VCM) and the Poynting-Thomson VCM in a rock mass by fusion of the observed displacement data from the …	[Gao, Xu; Yan, E-Chuan; Cai, Jing-Sen] China Univ Geosci, Fac Engn, Wuhan 430074, Peoples R China; [Yeh, Tian-Chyi Jim; Hao, Yong-Hong] Tianjin Normal Univ, Key Lab Water Environm & Resources, Tianjin, Peoples R China; [Yeh, Tian-Chyi Jim] Univ Arizona, Dept Hydrol & Atmospher Sci, 1133 E James E Rogers Way,122 Harshbarger Bldg 11, Tucson, AZ 85721 USA; [Yin, Xiao-Meng] Xinyang Normal Univ, Coll …	Yeh, TCJ (corresponding author), Univ Arizona, Dept Hydrol & Atmospher Sci, 1133 E James E Rogers Way,122 Harshbarger Bldg 11, Tucson, AZ 85721 USA.	yeh@hwr.arizona.edu		Wen, Jet-Chau/0000-0001-7363-1039	Fundamental Research Funds for the Central Universities, China University of Geosciences (Wuhan)Fundamental Research Funds for the Central Universities [CUG170686, G1323520270]; Engineering Research Center of Rock-Soil Drilling & Excavation and Protection, Ministry of Education; National Natural Science Foundation of ChinaNational Natural Science Foundation of China (NSFC) [41807264, 41672313, 41…	The first author acknowledge the support by the Fundamental Research Funds for the Central Universities, China University of Geosciences (Wuhan) (Grant No. G1323520270) and Engineering Research Center of Rock-Soil Drilling & Excavation and Protection, Ministry of Education. The second author acknowledge the support by the National Natural Science Foundation of China (Grant No. 41672313). The four…	Allaire G, 2004, J COMPUT PHYS, V194, P363, DOI 10.1016/j.jcp.2003.09.032; Boyd DL, 2018, ENG GEOL, V233, P200, DOI 10.1016/j.enggeo.2017.12.012; Cai M, 2011, ROCK MECH ROCK ENG, V44, P379, DOI 10.1007/s00603-011-0138-5; Canakci H, 2007, ENG GEOL, V94, P10, DOI 10.1016/j.enggeo.2007.06.009; Chen SJ, 2016, ROCK MECH ROCK ENG, V49, P855, DOI 10.1007/s00603-015-0795-x; Eivazy H, 2017, ROCK MECH ROCK…	44	0	0	5	11	ELSEVIER SCI LTD	OXFORD	THE BOULEVARD, LANGFORD LANE, KIDLINGTON, OXFORD OX5 1GB, OXON, ENGLAND	0266-352X	1873-7633		COMPUT GEOTECH	Comput. Geotech.	OCT	2020	126
J	Maanoja, S; Lakaniemi, AM; Lehtinen, L; Salminen, L; Auvinen, H; Kokko, M; Palmroth, M; Muuri, E; Rintala, J				Maanoja, Susanna; Lakaniemi, Aino-Maija; Lehtinen, Leena; Salminen, Linda; Auvinen, Hannele; Kokko, Marika; Palmroth, Marja; Muuri, Eveliina; Rintala, Jukka			Compacted bentonite as a source of substrates for sulfate-reducing microorganisms in a simulated excavation-damaged zone of a spent nuclear fuel repository	APPLIED CLAY SCIENCE			English	Article						Sulfide formation; Microbial activity; Organic matter; Engineered barrier system; Buffer-host rock interface; Geologic disposal	GEOLOGICAL REPOSITORIES; ORGANIC-MATTER; CARBON; BACTERIA; SULFIDE; CALCIUM; CLAYS; MX-80; ATP	Sulfide formed by sulfate-reducing microorganisms (SRM) is a potential safety risk in the geological disposal of spent nuclear fuel (SNF) enclosed in copper canisters because it can corrode copper. The canisters will be isolated from the environment by surrounding them with compacted bentonite. This study shows experimentally that the organic matter naturally present in compacted bentonites can b…	[Maanoja, Susanna; Lakaniemi, Aino-Maija; Lehtinen, Leena; Salminen, Linda; Auvinen, Hannele; Kokko, Marika; Palmroth, Marja; Rintala, Jukka] Tampere Univ, Fac Engn & Nat Sci, Res Grp Bio & Circular Econ, POB 541, Tampere 33014, Finland; [Maanoja, Susanna; Muuri, Eveliina] Posiva Oy, Olkiluoto 27160, Eurajoki, Finland	Maanoja, S (corresponding author), Tampere Univ, Fac Engn & Nat Sci, Res Grp Bio & Circular Econ, POB 541, Tampere 33014, Finland.	susanna.maanoja@tuni.fi		Palmroth, Marja Riitta Tuulikki/0000-0002-2368-5511; Auvinen, Hannele/0000-0002-8063-565X; Rintala, Jukka/0000-0003-3949-3810; Kokko, Marika/0000-0002-2208-8803; Lakaniemi, Aino-Maija/0000-0001-7189-8741	Posiva Oy; Swedish Nuclear Fuel and Waste Management Company	This work was funded by Posiva Oy and Swedish Nuclear Fuel and Waste Management Company. We thank B. Pastina, K. Koskinen, T. Lamminmaki, P. Pitkanen, V. Heino and M. Vuorio for their support and review of this work, and M. Pekala, P. Alt-Epping, P. Wersin, U. Mader and M. Kiczka for their help in planning the experiment and in interpreting the data. We are ever so thankful to J. Laakso, K. Raass…	[Anonymous], 1997, 1484 SFSEN; [Anonymous], 1979, 3021 SFS; [Anonymous], 2009, 10304 SFSEN ISO; Anthony J.W., 2001, HDB MINERALOGY; APHA AWWA WPCF, 1995, STANDARD METHODS EXA, V19; Autio J., 2013, 201215 POSIVA; Bengtsson A., 2017, TR1705 SWED NUCL FUE; Bengtsson A, 2017, APPL CLAY SCI, V137, P203, DOI 10.1016/j.clay.2016.12.024; Bomberg M, 2015, BIOMED RES INT, V2015, DOI 10.1155/2015/979530; Br…	64	0	0	5	9	ELSEVIER	AMSTERDAM	RADARWEG 29, 1043 NX AMSTERDAM, NETHERLANDS	0169-1317	1872-9053		APPL CLAY SCI	Appl. Clay Sci.	OCT	2020	196
J	Radnic, J; Matesan, D; Abaza, A				Radnic, Jure; Matesan, Domagoj; Abaza, Ante			Restoration and Strengthening of Historical Buildings: The Example of Minceta Fortress in Dubrovnik	ADVANCES IN CIVIL ENGINEERING			English	Article							SEISMIC RESISTANCE; MASONRY BUILDINGS; BASILICA; CHURCH	Firstly, some important aspects of the restoration and structural strengthening of historical masonry buildings are briefly discussed. Particularly, as an illustration of the appropriate approach to solving such an issue, an example of the restoration of the Minceta fortress in Dubrovnik has been described. Based on the results of the extensive field and laboratory works with defined damages and …	[Radnic, Jure; Matesan, Domagoj; Abaza, Ante] Univ Split, Fac Civil Engn Architecture & Geodesy, Split, Croatia	Radnic, J (corresponding author), Univ Split, Fac Civil Engn Architecture & Geodesy, Split, Croatia.	jure.radnic@gradst.hr; domagoj.matesan@gradst.hr; abaza.ante@gmail.com		Matesan, Domagoj/0000-0002-8497-224X	Ministry of Science, Education and Sport of CroatiaMinistry of Science, Education and Sports, Republic of Croatia; Society of Friends of Dubrovnik Antiques	This work was supported by funds from the Ministry of Science, Education and Sport of Croatia, as well as the Society of Friends of Dubrovnik Antiques. The authors appreciate their financial support.	Aguilar JS, 2002, BMC INFECT DIS, V2, DOI 10.1186/1471-2334-2-9; Aktas YD, 2015, J CULT HERIT, V16, P381, DOI 10.1016/j.culher.2014.06.009; Alessandri C, 2012, J CULT HERIT, V13, pE61, DOI 10.1016/j.culher.2012.10.010; [Anonymous], **NON-TRADITIONAL**; Bartoli G, 2019, ENG STRUCT, V180, P713, DOI 10.1016/j.engstruct.2018.10.001; Beritic L., 1955, FORTIFICATIONS TOWN; Betti M, 2008, ADV ENG SOFTW,…	38	0	0	2	3	HINDAWI LTD	LONDON	ADAM HOUSE, 3RD FLR, 1 FITZROY SQ, LONDON, W1T 5HF, ENGLAND	1687-8086	1687-8094		ADV CIV ENG	Adv. Civ. Eng.	SEP 30	2020	2020
J	Shi, GC; Yang, XJ; Chen, W; Chen, H; Zhang, JC; Tao, ZG				Shi, Guangcheng; Yang, Xiaojie; Chen, Wen; Chen, Hong; Zhang, Jicheng; Tao, Zhigang			Characteristics of failure area and failure mechanism of a landslide in Yingjiang County, Yunnan, China	LANDSLIDES			English	Article						Landslide; Instability mechanism; Slope excavation; Rainfall; Field investigation	INDUCED SLOPE FAILURE; REACTIVATED LANDSLIDE; TRIGGERING MECHANISM; STABILITY ANALYSIS; SOIL SLOPES; DEFORMATION; EXCAVATION; EVOLUTION; FLOW	Due to excavations and continuous rainfall, two landslides occurred on February 9, 2018, and July 28, 2019, respectively, in the quarry of the Changdifang Reservoir engineering area, in Yingjiang County, Yunnan Province, China. The volume of the second landslide was approximately 2.4 x 10(5) m(3), threatening the safety of construction workers and the hydropower station project construction sever…	[Shi, Guangcheng; Yang, Xiaojie; Chen, Wen; Chen, Hong; Zhang, Jicheng; Tao, Zhigang] China Univ Min & Technol Beijing, State Key Lab Geomech & Deep Underground Engn, Beijing 100083, Peoples R China; [Shi, Guangcheng; Yang, Xiaojie; Chen, Wen; Chen, Hong; Zhang, Jicheng; Tao, Zhigang] China Univ Min & Technol Beijing, Sch Mech & Civil Engn, Beijing 100083, Peoples R China	Tao, ZG (corresponding author), China Univ Min & Technol Beijing, Sch Mech & Civil Engn, Beijing 100083, Peoples R China.	taozhigang@263.net		Tao, Zhigang/0000-0002-8908-3038	Fundamental Research Funds for the Central UniversitiesFundamental Research Funds for the Central Universities [2015QB02, 800015Z1207]	FundingThis study was financially supported by the Fundamental Research Funds for the Central Universities (Grant No. 2015QB02) and the Special Fund of Yueqi Scholars (No. 800015Z1207). All financial supports are greatly appreciated.Data availabilityThe data used to support the findings of this study are available from the corresponding author upon request.	Al-Homoud AS, 1998, ENVIRON GEOL, V33, P299, DOI 10.1007/s002540050250; Askarinejad A., 2012, RIV ITAL GEOTEC, V3, P50; Bordoloi S, 2020, ENG GEOL, P105742; Cen DF, 2017, ACTA GEOTECH, V12, P391, DOI 10.1007/s11440-016-0468-2; Chung MC, 2017, LANDSLIDES, V14, P19, DOI 10.1007/s10346-016-0698-2; Cogan J, 2018, LANDSLIDES, V15, P1215, DOI 10.1007/s10346-018-0982-4; Cui YF, 2019, LANDSLIDES, V16, P8…	36	0	0	24	38	SPRINGER HEIDELBERG	HEIDELBERG	TIERGARTENSTRASSE 17, D-69121 HEIDELBERG, GERMANY	1612-510X	1612-5118		LANDSLIDES	Landslides	FEB	2021	18	2
J	Fan, JY; Guo, ZB; Qiao, XB; Tao, ZG; Wang, FN				Fan, Jinyan; Guo, Zhibiao; Qiao, Xiaobing; Tao, Zhigang; Wang, Fengnian			Constant Resistance and Yielding Support Technology for Large Deformations of Surrounding Rocks in the Minxian Tunnel	ADVANCES IN CIVIL ENGINEERING			English	Article							STABILITY	During the excavation of the Minxian tunnel, problems of large deformations of surrounding rocks and failure of support structures appeared frequently, which caused serious influences on construction safety and costs of the tunnel. Based on laboratory analysis of mineral composition and field investigations on deformation characteristics of the surrounding rocks, the large deformation mechanism o…	[Fan, Jinyan; Guo, Zhibiao; Tao, Zhigang; Wang, Fengnian] State Key Lab Geomech & Deep Underground Engn, Beijing 100083, Peoples R China; [Fan, Jinyan; Wang, Fengnian] China Univ Min & Technol Beijing, Sch Mech & Civil Engn, Beijing 100083, Peoples R China; [Qiao, Xiaobing] Gansu Changda Highway Co Ltd, Lanzhou 730000, Peoples R China	Guo, ZB; Tao, ZG (corresponding author), State Key Lab Geomech & Deep Underground Engn, Beijing 100083, Peoples R China.	bqt1700602043@student.cumtb.edu.cn; guozhibiaobj@126.com; 1548945894@qq.com; taozhigang@263.net; wangfn_bj@163.com		Wang, Fengnian/0000-0002-9528-9817; Tao, Zhigang/0000-0002-8908-3038; FAN, JIN YAN/0000-0002-2725-8277	Gansu Changda Highway Co. Ltd.	The authors thank Fifth Engineering Co. Ltd. of First Highway Group of China Communications Construction for cooperation in the field tests and data collection for this study. The authors also gratefully acknowledge the financial support provided by the Gansu Changda Highway Co. Ltd.	CAO CY, 2018, SPACE TECHNOLOGY, V0077, P00188, DOI DOI 10.1016/J.TUST.2018.04.0072-S2.0-85045087163; Cardosa MJ, 2002, BMC MICROBIOL, V2, DOI 10.1186/1471-2180-2-9; Chen J. J., 2005, TUNNEL CONSTRUCTION, V25, P41; Chen W. Z., 2018, ANAL MECH LARGE DEFO; Chen ZH, 2002, BMC CANCER, V2, DOI 10.1186/1471-2407-2-18; Ding XL, 2017, ROCK MECH ROCK ENG, V50, P2443, DOI 10.1007/s00603-017-1247-6; He M. C.…	17	0	0	5	5	HINDAWI LTD	LONDON	ADAM HOUSE, 3RD FLR, 1 FITZROY SQ, LONDON, W1T 5HF, ENGLAND	1687-8086	1687-8094		ADV CIV ENG	Adv. Civ. Eng.	SEP 28	2020	2020
J	Zhang, DY; Liu, SY; Jia, JG				Zhang, Deyi; Liu, Songyong; Jia, Jiguang			Influence of Motion Parameters on Cutting Performance of Boom-Type Roadheader During the Swing Cutting	ARABIAN JOURNAL FOR SCIENCE AND ENGINEERING			English	Article						Cutting performance; Motion parameters; Swing cutting; Cutting performance indexes	ROCK PROPERTIES; CONICAL PICKS; FRAGMENTATION; PREDICTION; DESIGN; ANGLE; WEAR	The cutting performance of the boom-type roadheader impacts the energy consumption and efficiency of coal mine roadway excavation. The purpose of this work is to investigate the influence of motion parameters on cutting performance. The motion of the cutting head during swing cutting was simplified to establish a numerical model. Rock samples were arranged to perform the swing cutting to test the…	[Zhang, Deyi; Liu, Songyong; Jia, Jiguang] China Univ Min & Technol, Sch Mech Engn, Xuzhou 221116, Jiangsu, Peoples R China; [Zhang, Deyi; Liu, Songyong; Jia, Jiguang] China Univ Min & Technol, Jiangsu Collaborat Innovat Ctr Intelligent Min Eq, Xuzhou 221008, Jiangsu, Peoples R China	Liu, SY (corresponding author), China Univ Min & Technol, Sch Mech Engn, Xuzhou 221116, Jiangsu, Peoples R China.; Liu, SY (corresponding author), China Univ Min & Technol, Jiangsu Collaborat Innovat Ctr Intelligent Min Eq, Xuzhou 221008, Jiangsu, Peoples R China.	lsycumt@163.com		Liu, Songyong/0000-0002-2801-7969	National Natural Science Foundation of ChinaNational Natural Science Foundation of China (NSFC) [.51975570]; Top-notch Academic Programs Project of Jiangsu Higher Education Institutions (TAPP); Priority Academic Program Development of Jiangsu Higher Education Institutions (PAPD)	This work is supported by the National Natural Science Foundation of China (No .51975570), the Top-notch Academic Programs Project of Jiangsu Higher Education Institutions (TAPP) and Project Funded by the Priority Academic Program Development of Jiangsu Higher Education Institutions (PAPD).	Acaroglu O, 2006, TUNN UNDERGR SP TECH, V21, P172, DOI 10.1016/j.tust.2005.04.004; Acaroglu O, 2005, T I MIN METALL A, V114, P140, DOI 10.1179/037178405X54015; Balci C, 2004, J S AFR I MIN METALL, V104, P633; Bilgin N, 2006, INT J ROCK MECH MIN, V43, P139, DOI 10.1016/j.ijrmms.2005.04.009; Comakli R, 2014, TUNN UNDERGR SP TECH, V40, P38, DOI 10.1016/j.tust.2013.09.009; Deliac EP, 1993, COMPREHENS…	37	0	0	36	43	SPRINGER HEIDELBERG	HEIDELBERG	TIERGARTENSTRASSE 17, D-69121 HEIDELBERG, GERMANY	2193-567X	2191-4281		ARAB J SCI ENG	Arab. J. Sci. Eng.	MAY	2021	46	5
[truncated: 4,236 more rows]
[truncated: 17 more columns]
